# Supplementary material
Source: PubMed Central journal article supplement (PMC7191844)
Supplement: ao0c01104_si_001.pdf [file ao0c01104_si_001.pdf]

# Supporting Information

## DMAP-catalyzed one-pot synthesis of quinazoline-2,4-diones from 2-aminobenzamides and di-*tert*-butyl dicarbonate

Hui Chen,<sup>†</sup> Peng Li,<sup>‡</sup> Rongfei Qin,<sup>‡</sup> Hong Yan,<sup>†</sup> Gang Li,<sup>\*,‡</sup> and Haihong Huang<sup>\*,‡</sup>

<sup>†</sup> Beijing Key Laboratory of Environmental and Viral Oncology, College of Life Science and Bio-engineering, Beijing University of Technology, Beijing 100124, P. R. China

<sup>‡</sup> Beijing Key Laboratory of Active Substance Discovery and Druggability Evaluation & Chinese Academy of Medical Sciences Key Laboratory of Anti-DR TB Innovative Drug Research, Institute of Materia Medica, Peking Union Medical College and Chinese Academy of Medical Sciences, Beijing 100050, P. R. China

\*E-mail: ligang@imm.ac.cn; joyce@imm.ac.cn.

### Contents

|                                                                  | Page    |
|------------------------------------------------------------------|---------|
| General Information                                              | S2      |
| <sup>1</sup> H NMR and <sup>13</sup> C NMR Spectra of <b>5</b>   | S3-S22  |
| <sup>1</sup> H NMR and <sup>13</sup> C NMR Spectra of <b>6</b>   | S23-S38 |
| <sup>1</sup> H NMR Spectra of <b>7</b>                           | S39-S42 |
| <sup>1</sup> H NMR and <sup>13</sup> C NMR Spectra of <b>8</b>   | S43-S50 |
| <sup>1</sup> H NMR and <sup>13</sup> C NMR Spectra of <b>12</b>  | S51     |
| <sup>1</sup> H NMR and <sup>13</sup> C NMR Spectra of Zenarestat | S52     |

## General Information

The reagents and solvents were obtained from commercial suppliers and used without further purification. TLC was performed on silica gel plates (GF254) with visualization of components by UV light (254 nm).  $^1\text{H}$  and  $^{13}\text{C}$  NMR spectra were recorded on Varian 400 or 500 MHz NMR spectrometer with  $\text{DMSO-}d_6$  as a solvent. Chemical shifts are referenced to the residual solvent peak and reported in ppm ( $\delta$  scale) and all coupling constant ( $J$ ) values are given in Hz. The following multiplicity abbreviations are used: (s) singlet, (d) doublet, (t) triplet, (q) quartet, (m) multiplet, and (br) broad. ESI-HRMS data were measured on Thermo Exactive Orbitrap plus spectrometer. Melting points were determined on Yanaco MP-J3 microscope melting point apparatus. All microwave reactions were carried out in single-mode CEM Explorer SP 48.

# $^1\text{H}$ NMR and $^{13}\text{C}$ NMR Spectra

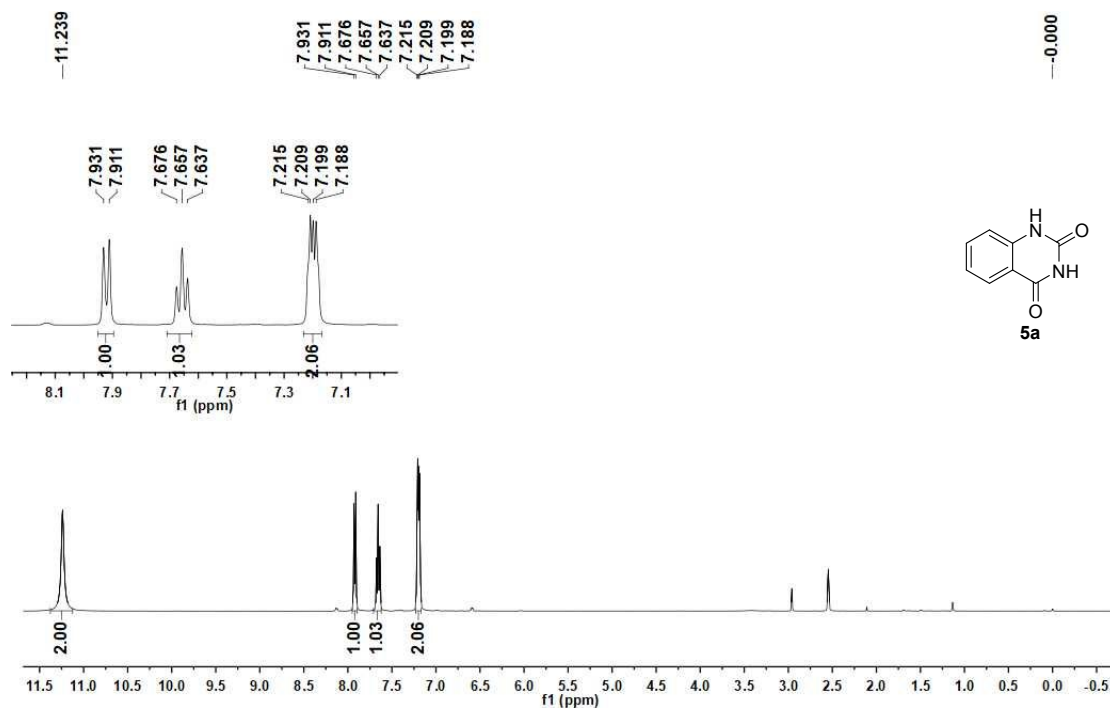

Figure S1.  $^1\text{H}$  NMR spectra of quinazoline-2,4(1*H*,3*H*)-dione (**5a**)

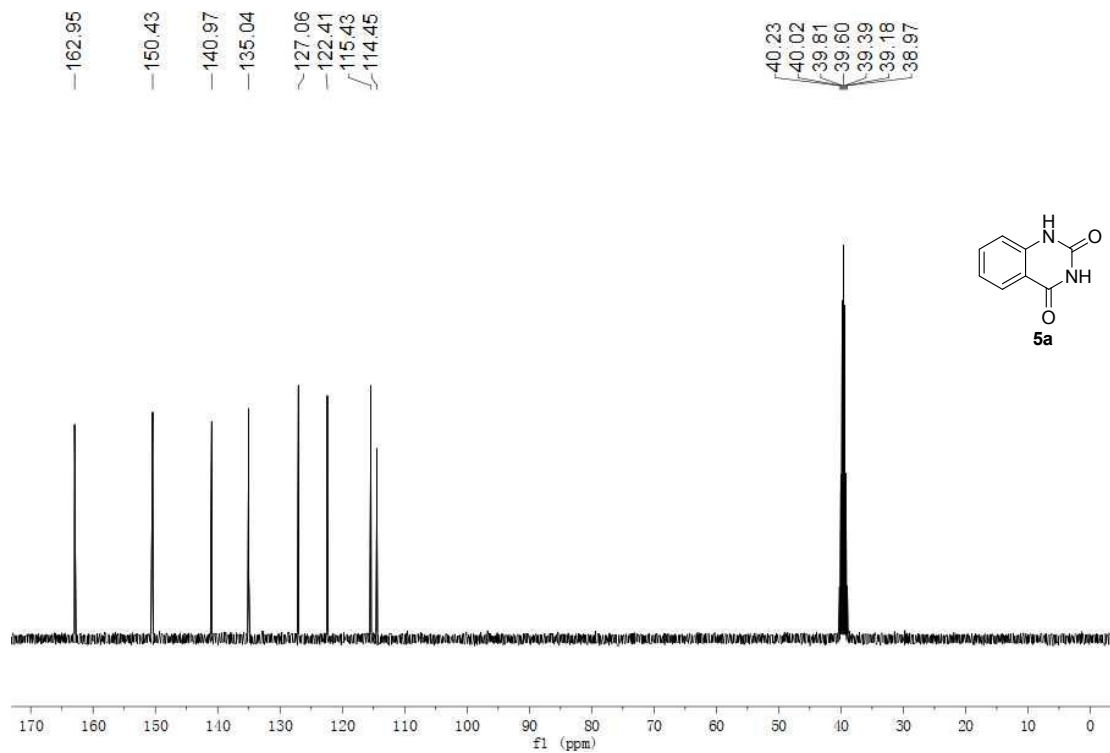

Figure S2.  $^{13}\text{C}$  NMR spectra of quinazoline-2,4(1*H*,3*H*)-dione (**5a**)

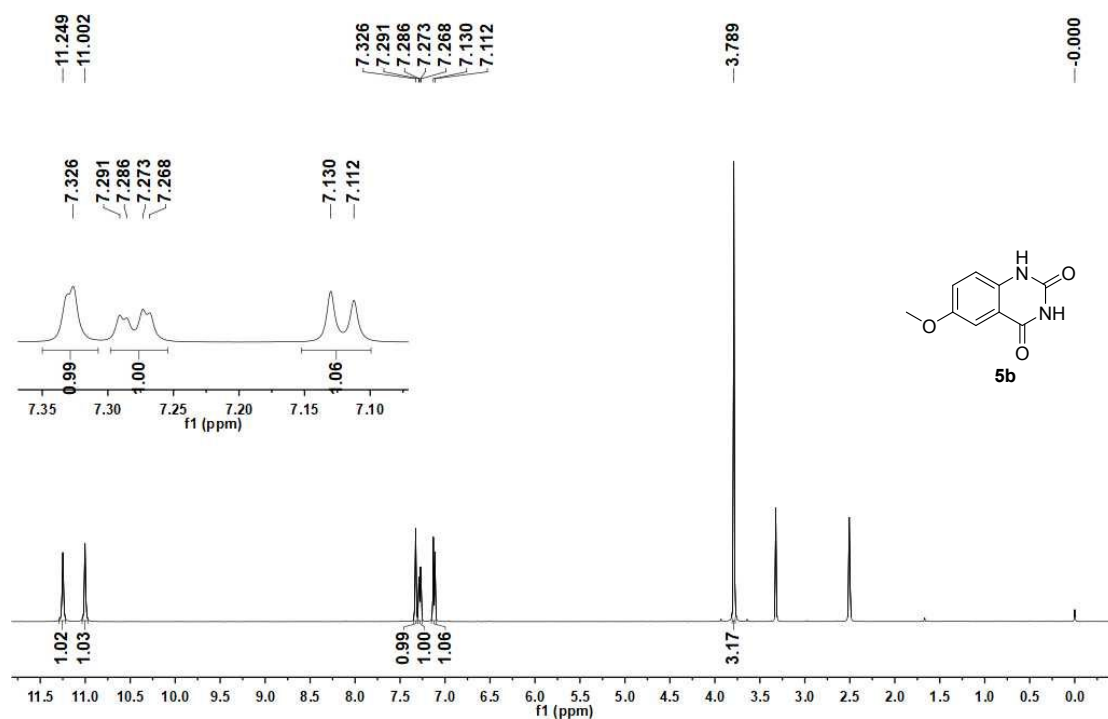

Figure S3. <sup>1</sup>H NMR spectra of 6-methoxyquinazoline-2,4(1*H*,3*H*)-dione (5b)

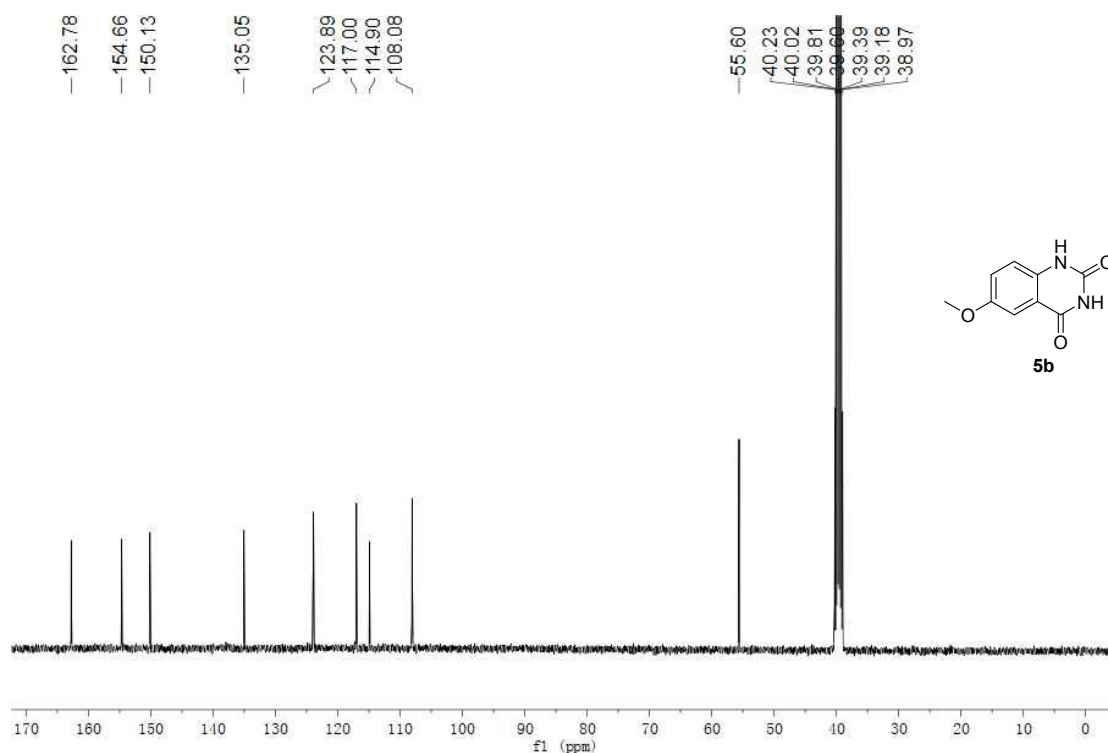

Figure S4. <sup>13</sup>C NMR spectra of 6-methoxyquinazoline-2,4(1*H*,3*H*)-dione (5b)

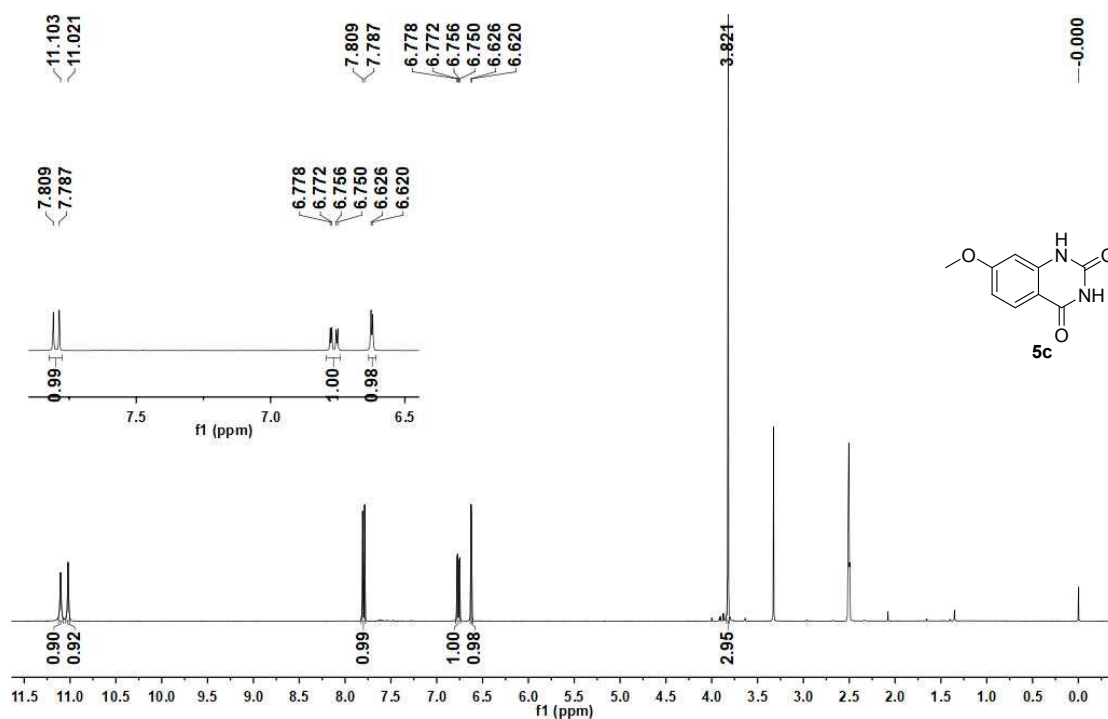

Figure S5. <sup>1</sup>H NMR spectra of 7-methoxyquinazoline-2,4(1*H*,3*H*)-dione (5c)

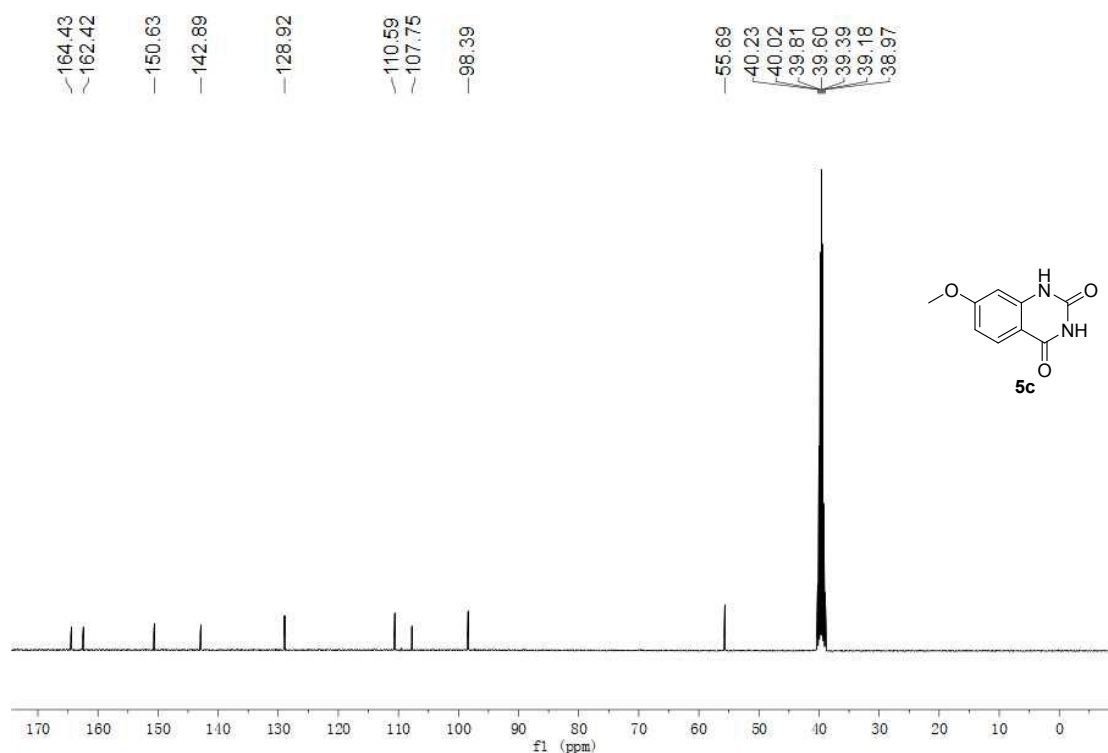

Figure S6. <sup>13</sup>C NMR spectra of 7-methoxyquinazoline-2,4(1*H*,3*H*)-dione (5c)

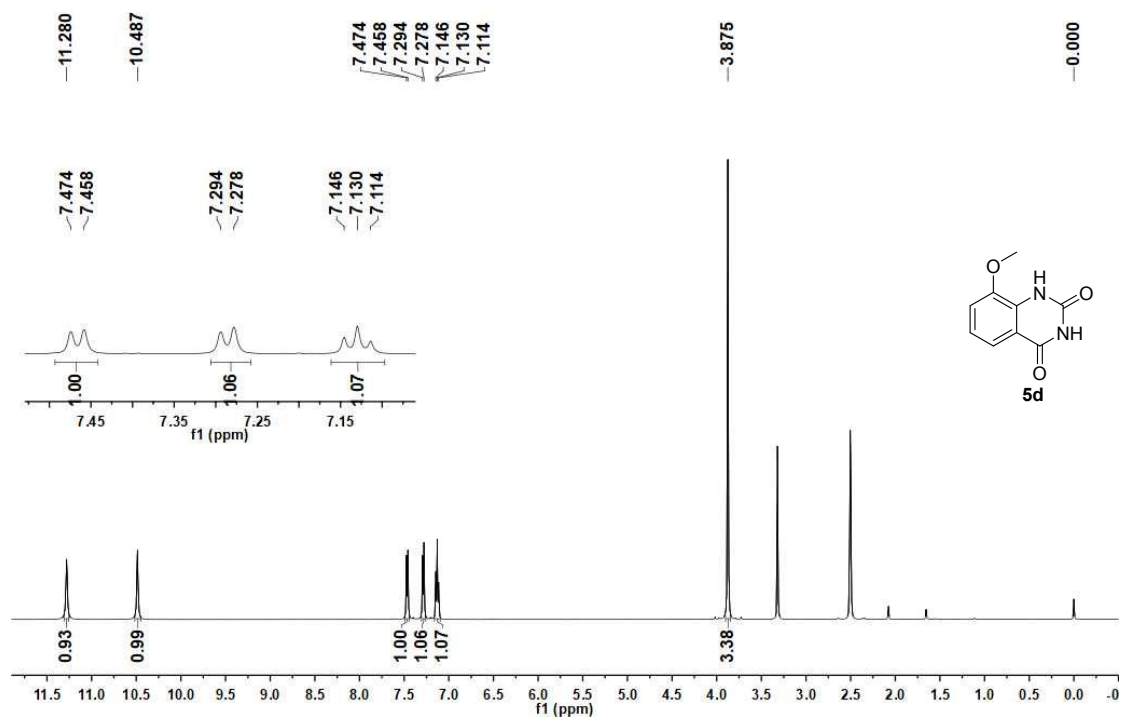

Figure S7.  $^1\text{H}$  NMR spectra of 8-methoxyquinazoline-2,4(1H,3H)-dione (5d)

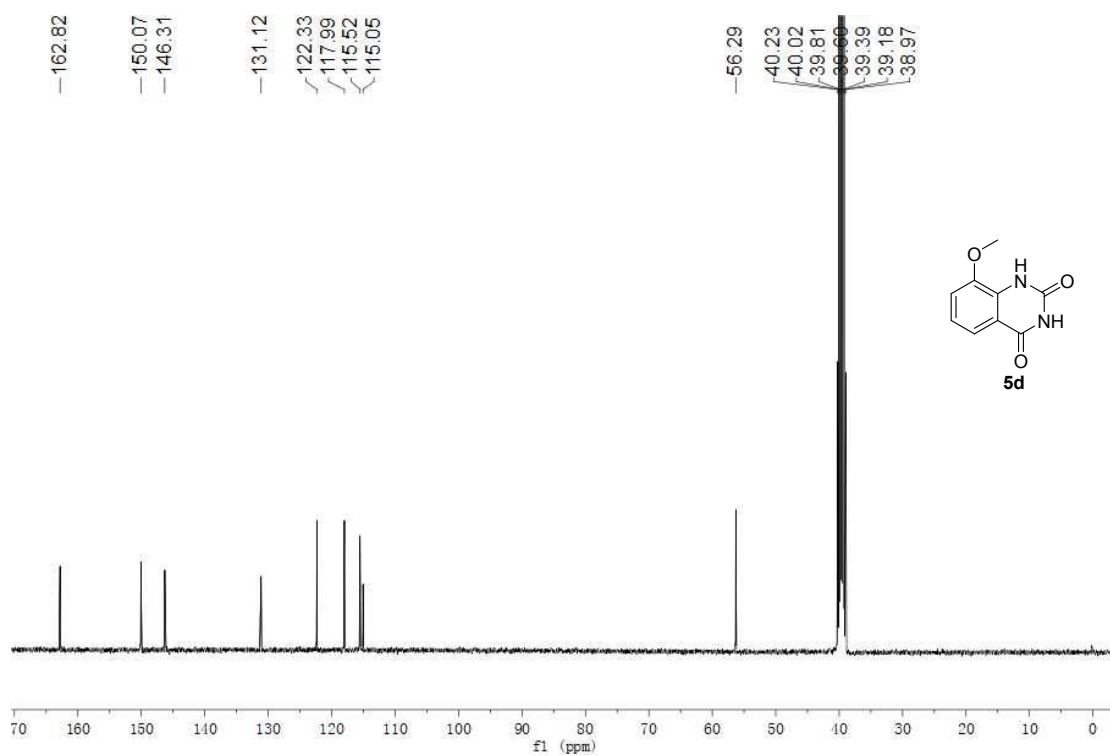

Figure S8.  $^{13}\text{C}$  NMR spectra of 8-methoxyquinazoline-2,4(1H,3H)-dione (5d)

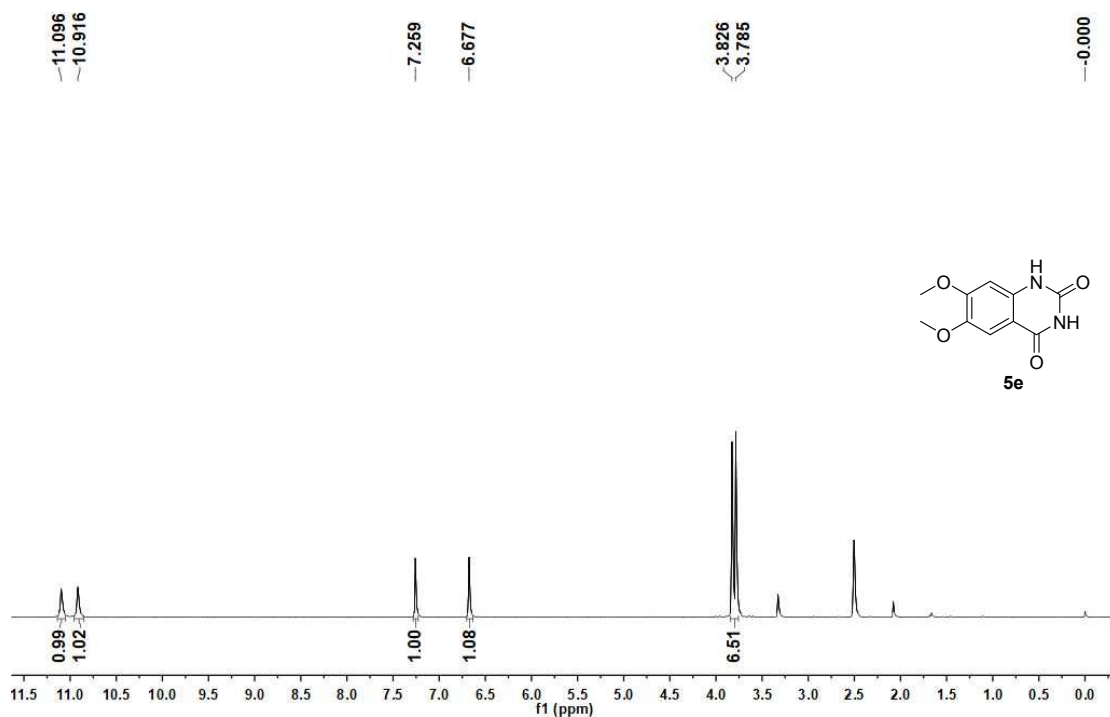

Figure S9.  $^1\text{H}$  NMR spectra of 6,7-dimethoxyquinazoline-2,4(1H,3H)-dione (5e)

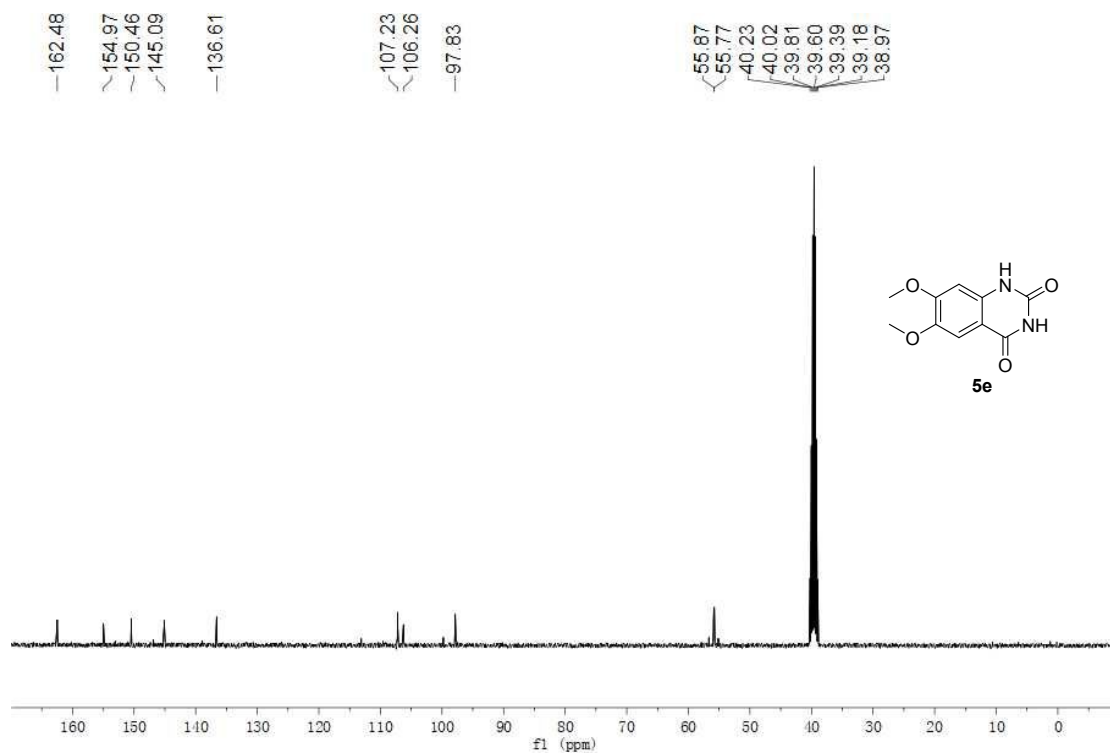

Figure S10.  $^{13}\text{C}$  NMR spectra of 6,7-dimethoxyquinazoline-2,4(1H,3H)-dione (5e)

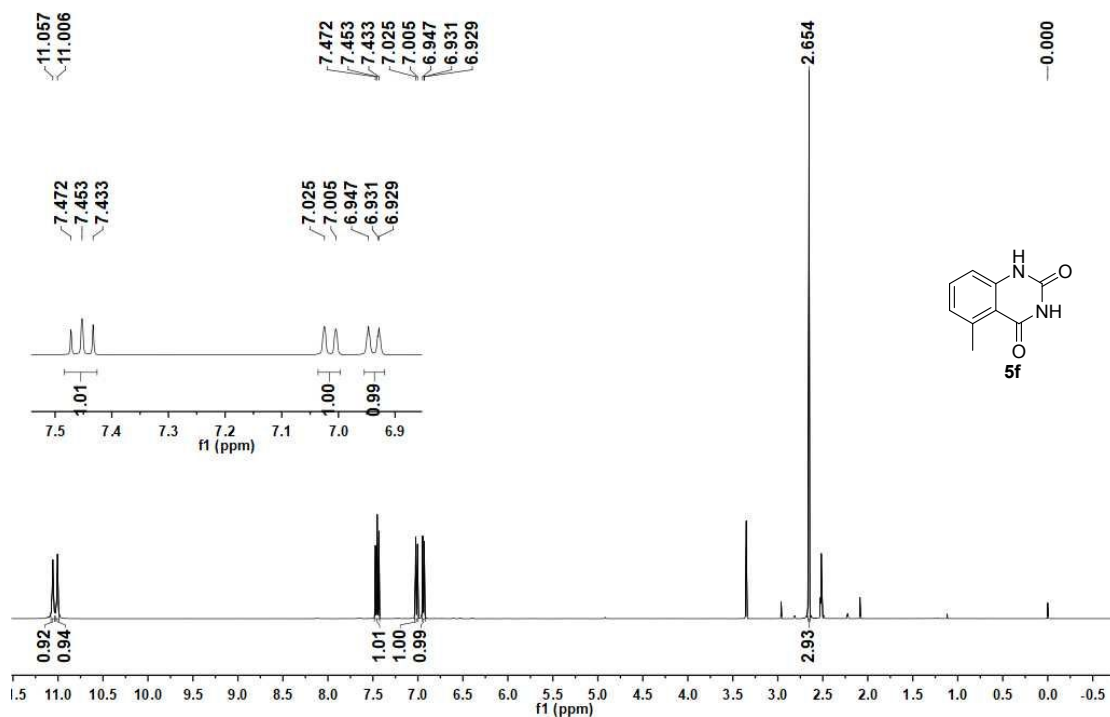

Figure S11. <sup>1</sup>H NMR spectra of 5-methylquinazoline-2,4(1*H*,3*H*)-dione (5f)

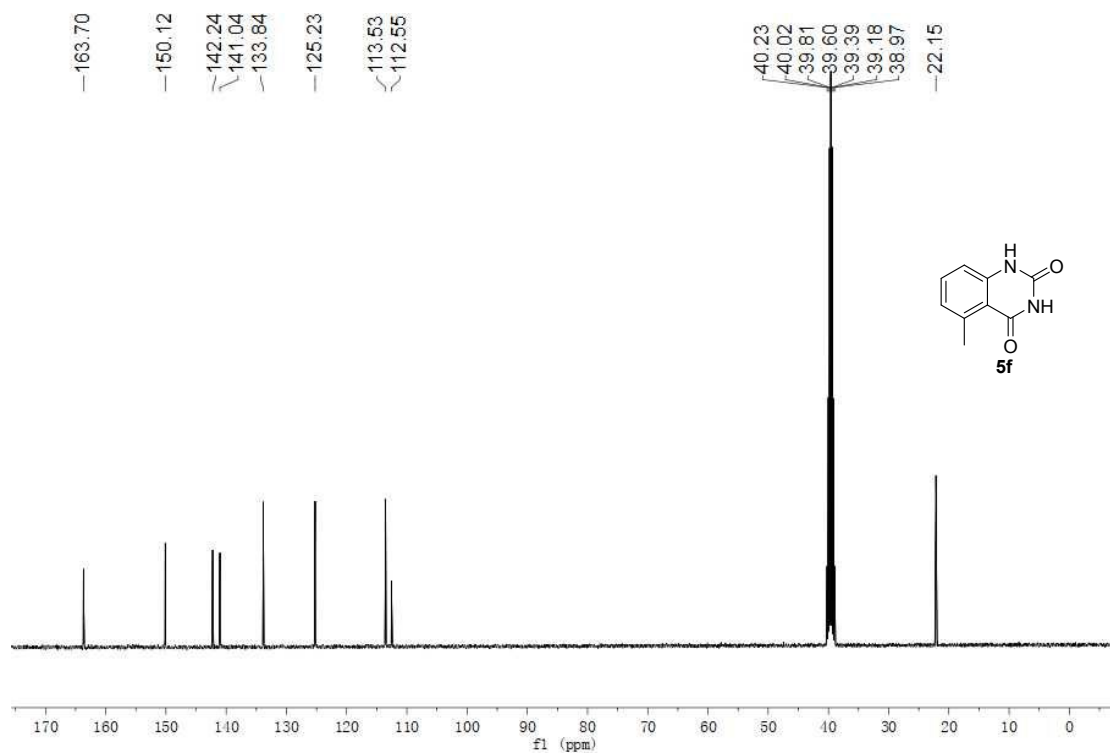

Figure S12. <sup>13</sup>C NMR spectra of 5-methylquinazoline-2,4(1*H*,3*H*)-dione (5f)



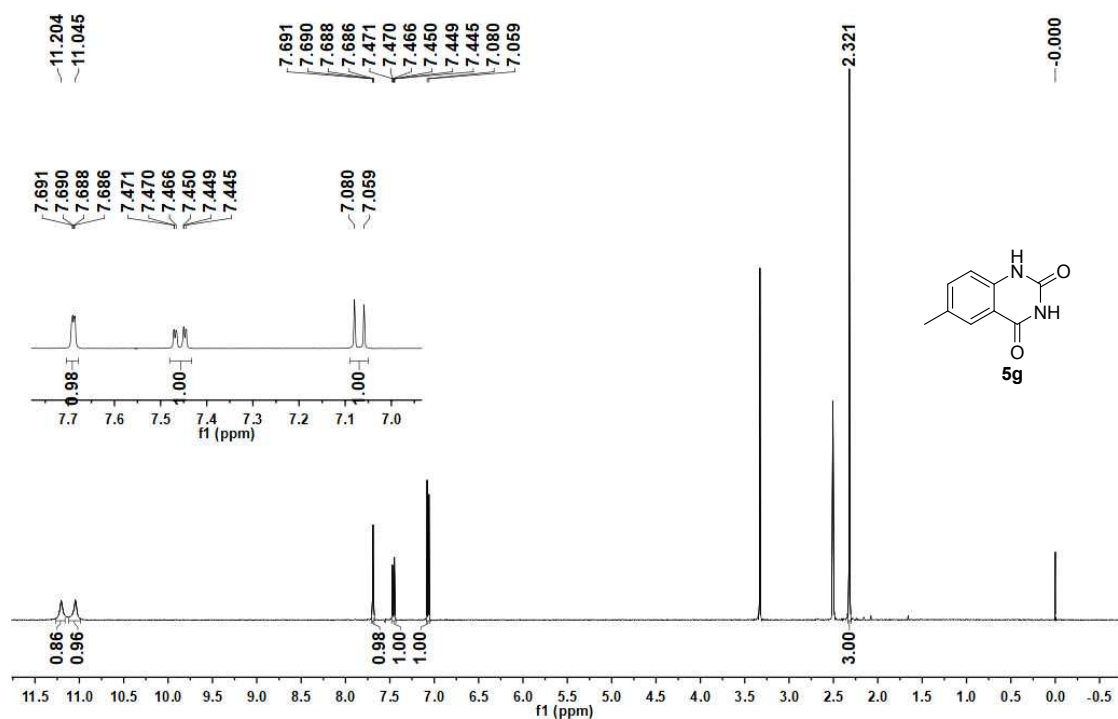

Figure S13.  $^1\text{H}$  NMR spectra of 6-methylquinazoline-2,4(1H,3H)-dione (5g)

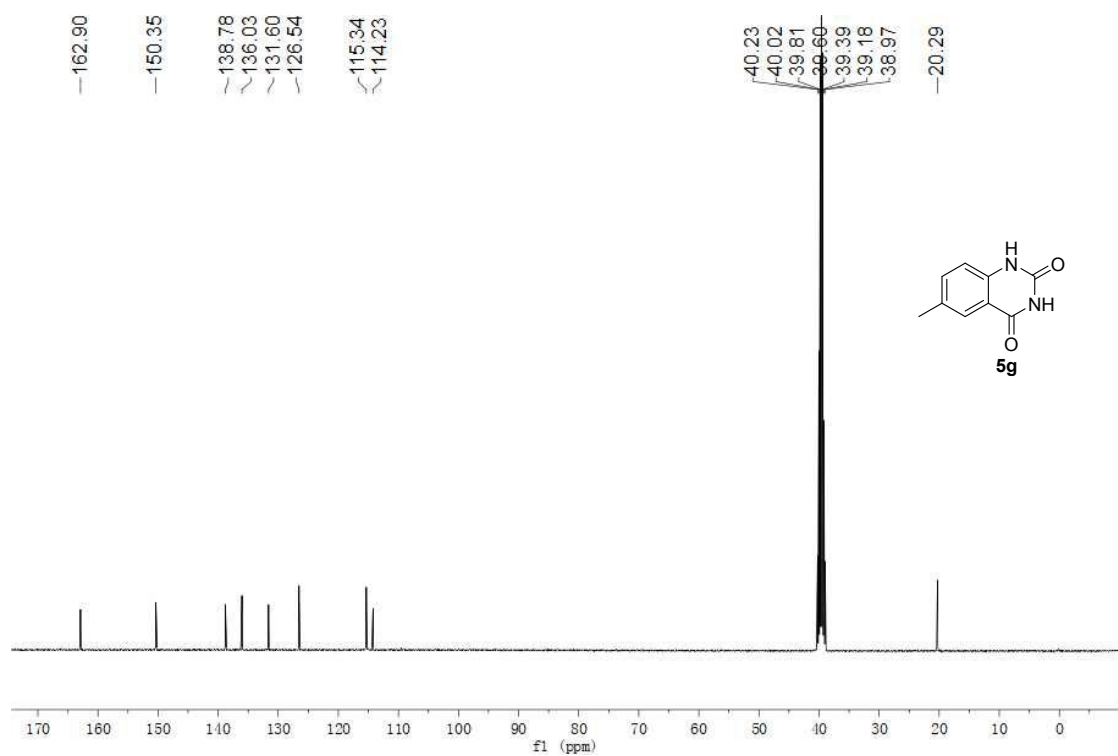

Figure S14.  $^{13}\text{C}$  NMR spectra of 6-methylquinazoline-2,4(1H,3H)-dione (5g)

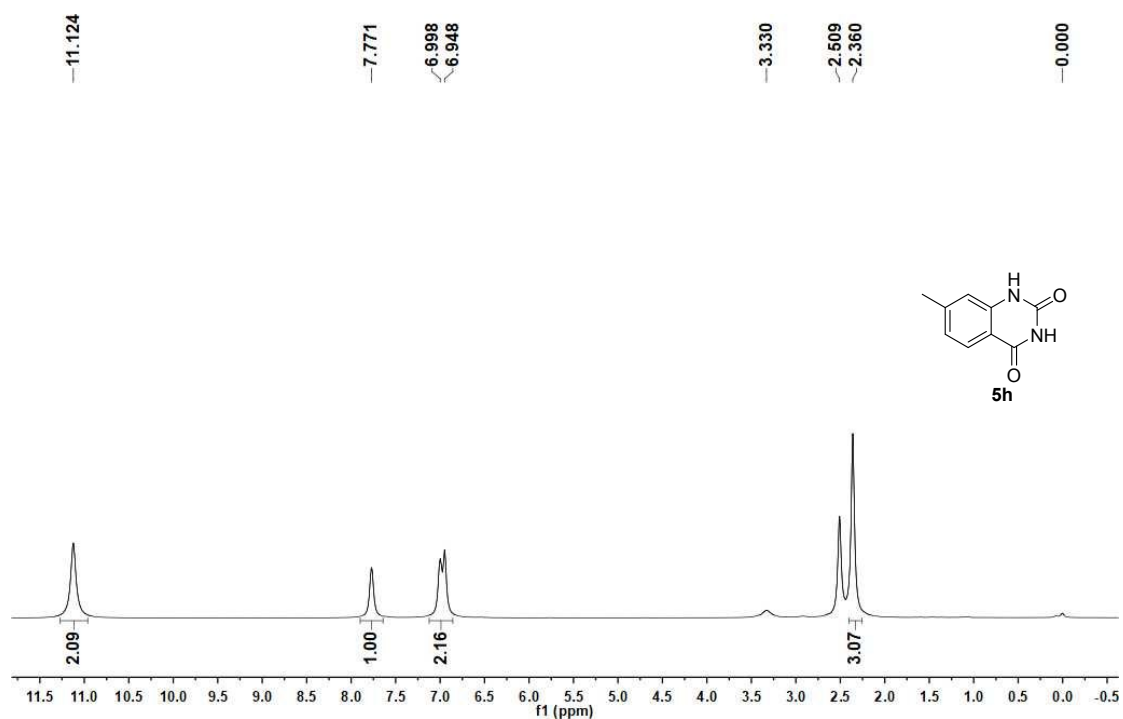

Figure S15.  $^1\text{H}$  NMR spectra of 7-methylquinazoline-2,4(1H,3H)-dione (5h)

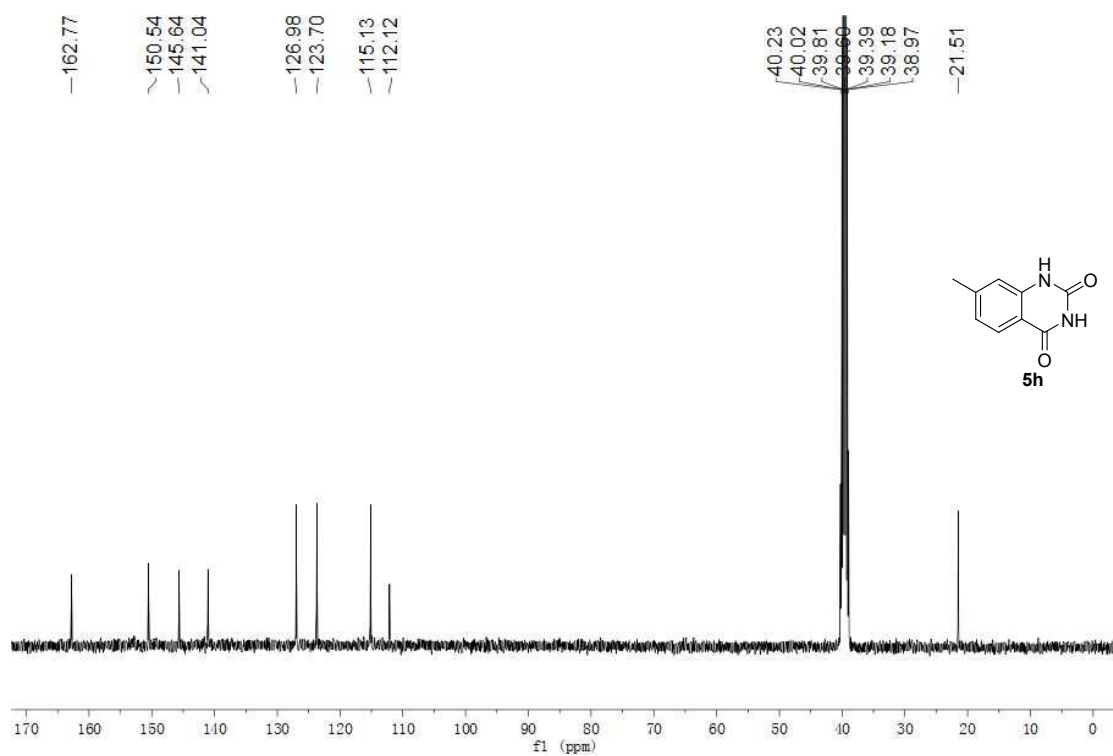

Figure S16.  $^{13}\text{C}$  NMR spectra of 7-methylquinazoline-2,4(1H,3H)-dione (5h)

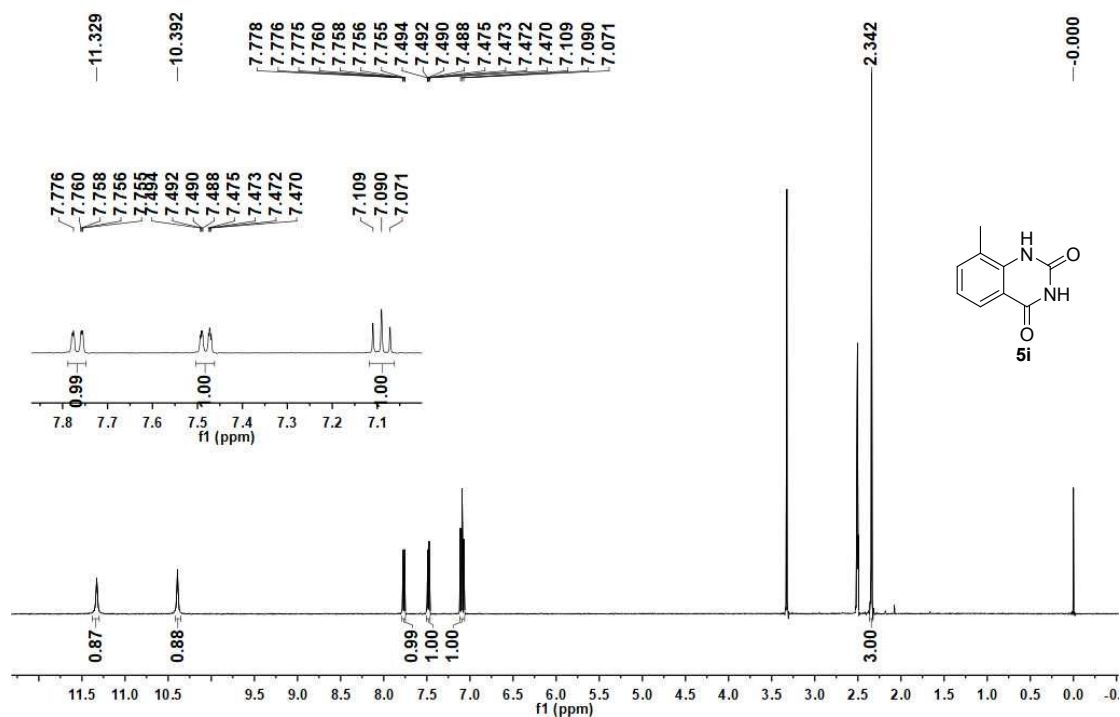

Figure S17. <sup>1</sup>H NMR spectra of 8-methylquinazoline-2,4(1H,3H)-dione (5i)

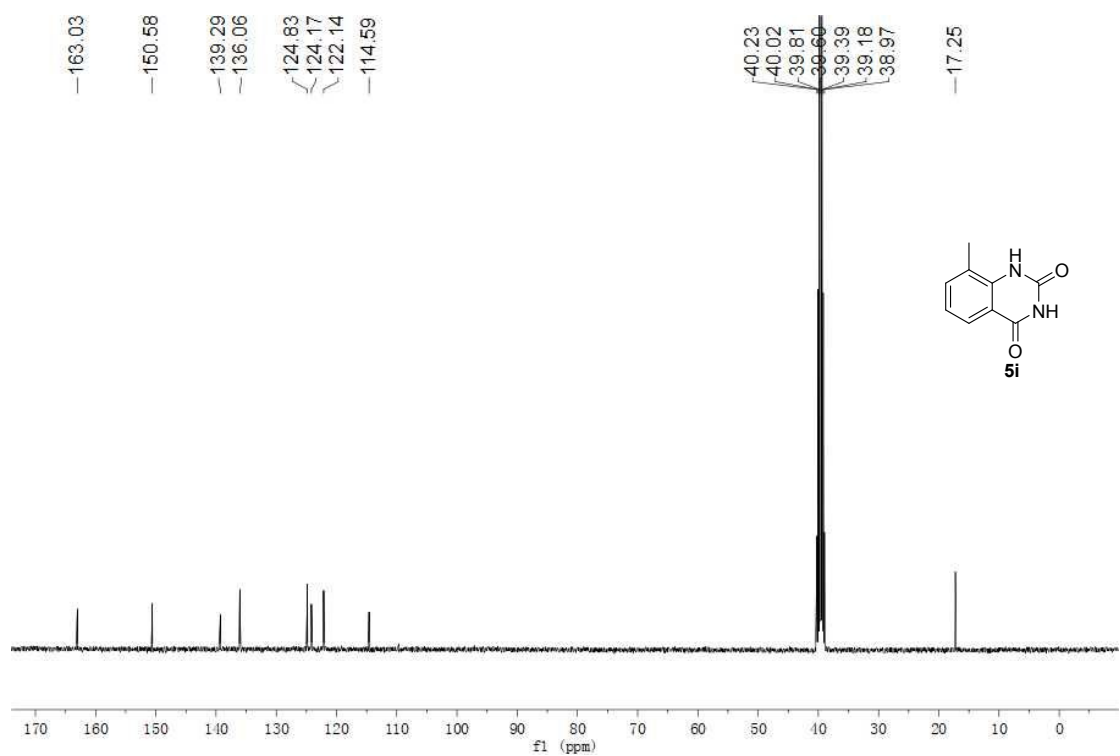

Figure S18. <sup>13</sup>C NMR spectra of 8-methylquinazoline-2,4(1H,3H)-dione (5i)

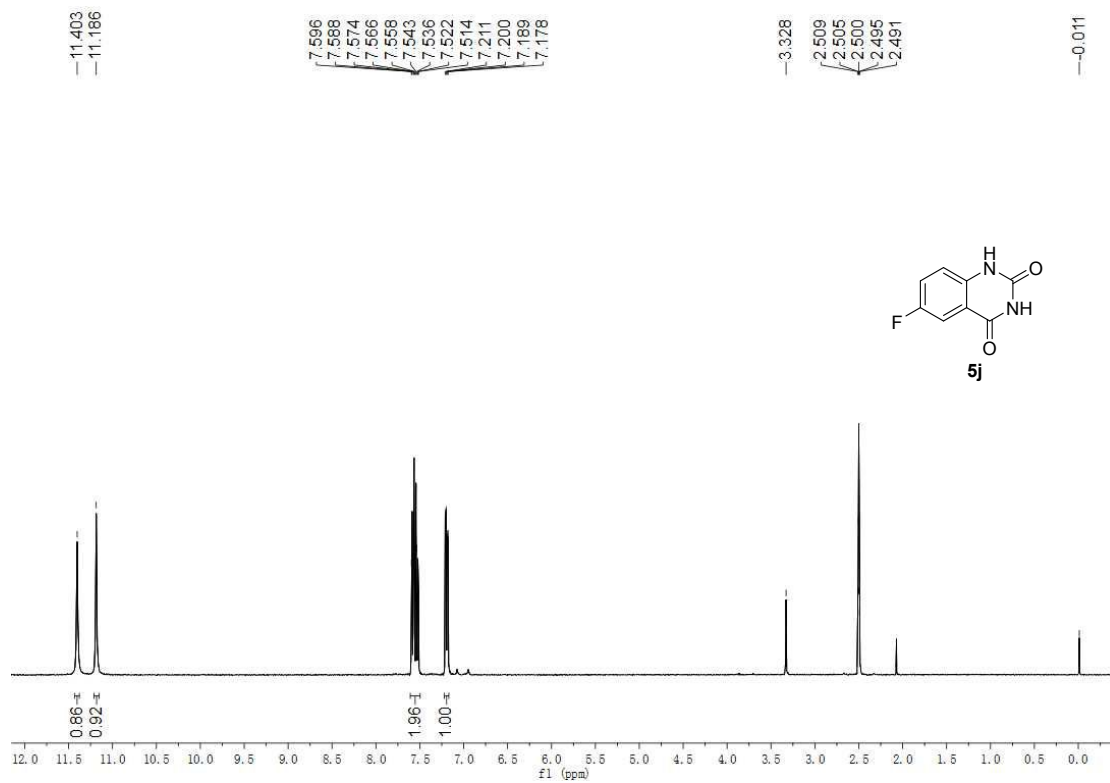

Figure S19.  $^1\text{H}$  NMR spectra of 6-fluoroquinazoline-2,4(1H,3H)-dione (5j)

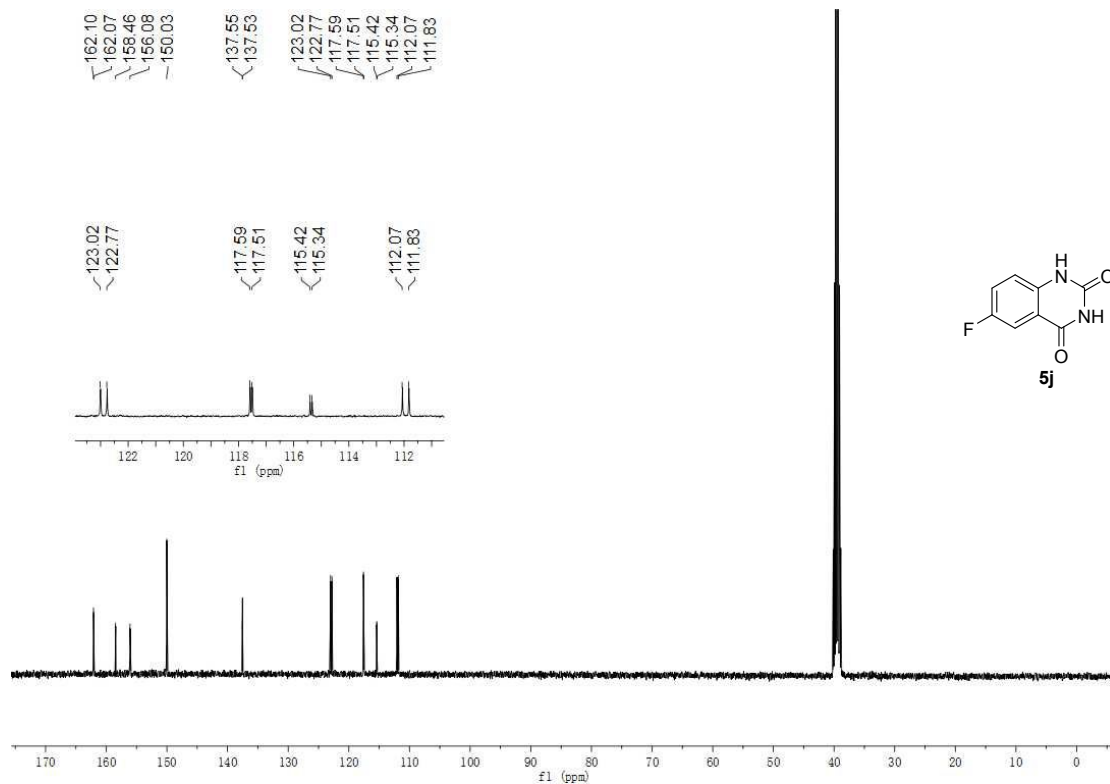

Figure S20.  $^{13}\text{C}$  NMR spectra of 6-fluoroquinazoline-2,4(1H,3H)-dione (5j)

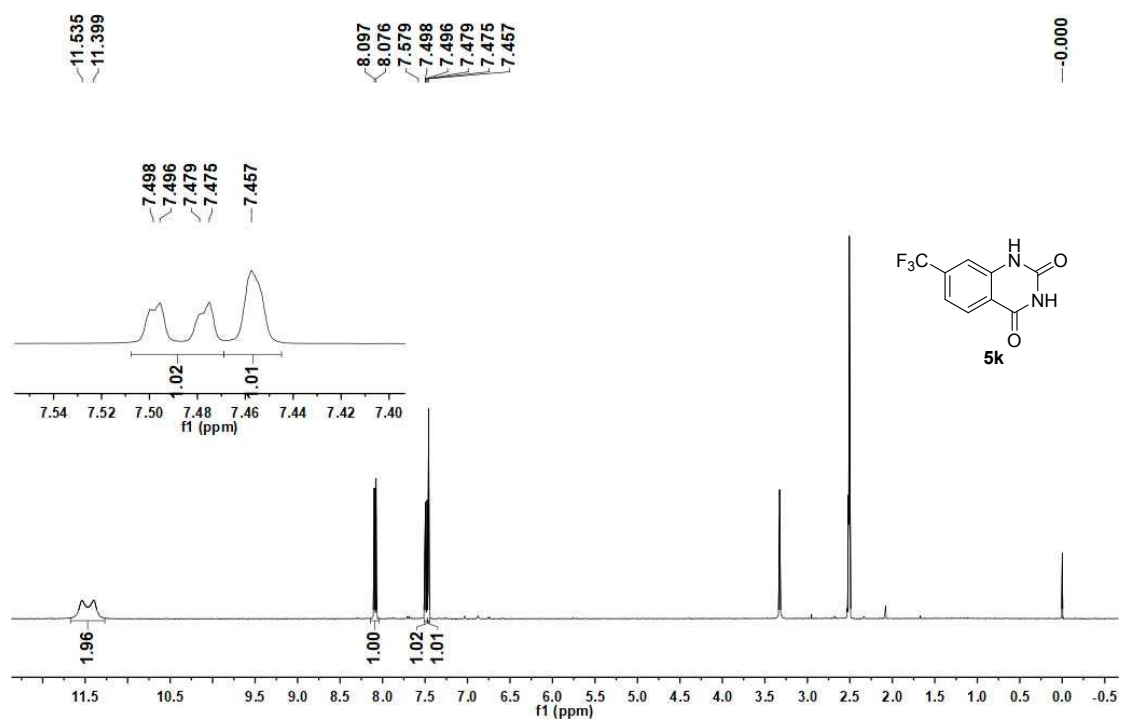

Figure S21.  $^1\text{H}$  NMR spectra of 7-(trifluoromethyl)quinazoline-2,4(1H,3H)-dione (5k)

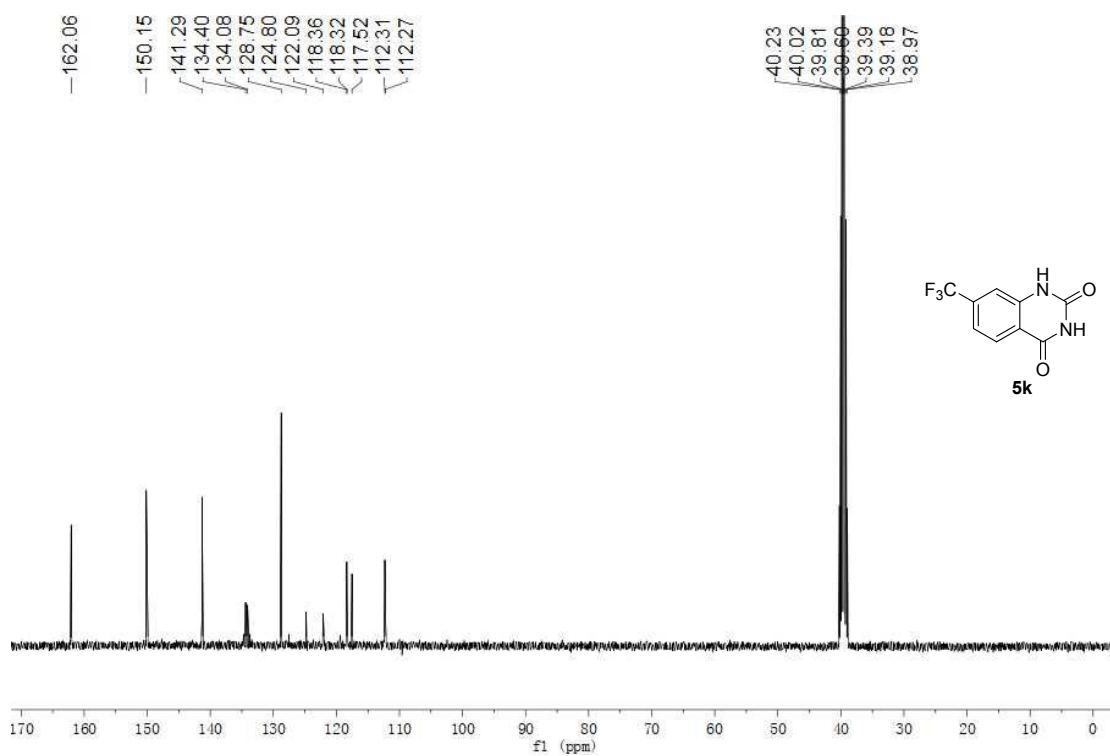

Figure S22.  $^{13}\text{C}$  NMR spectra of 7-(trifluoromethyl)quinazoline-2,4(1H,3H)-dione (5k)

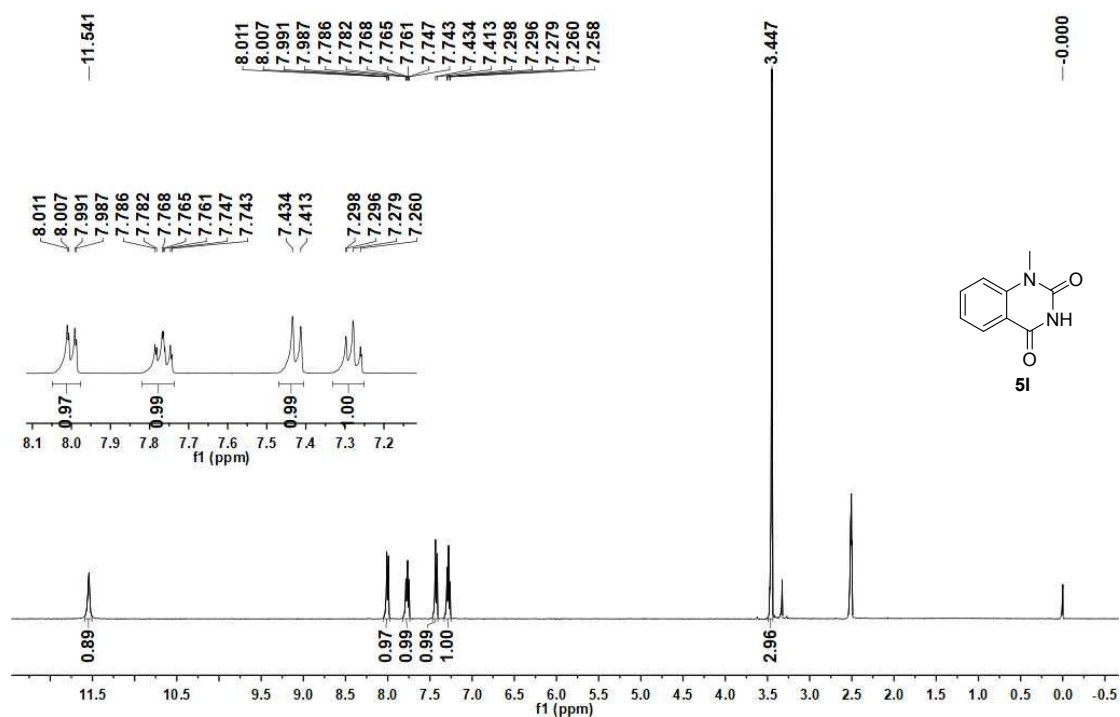

Figure S23. <sup>1</sup>H NMR spectra of 1-methylquinazoline-2,4(1H,3H)-dione (5I)

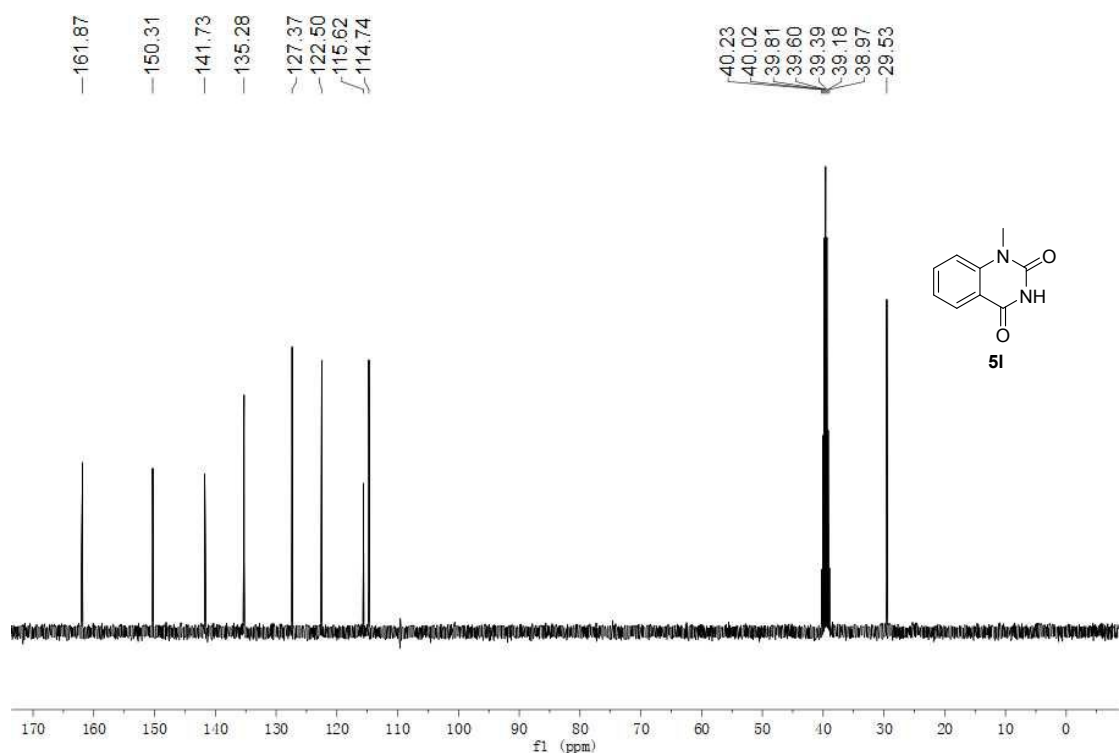

Figure S24 <sup>13</sup>C NMR spectra of 1-methylquinazoline-2,4(1H,3H)-dione (5I)

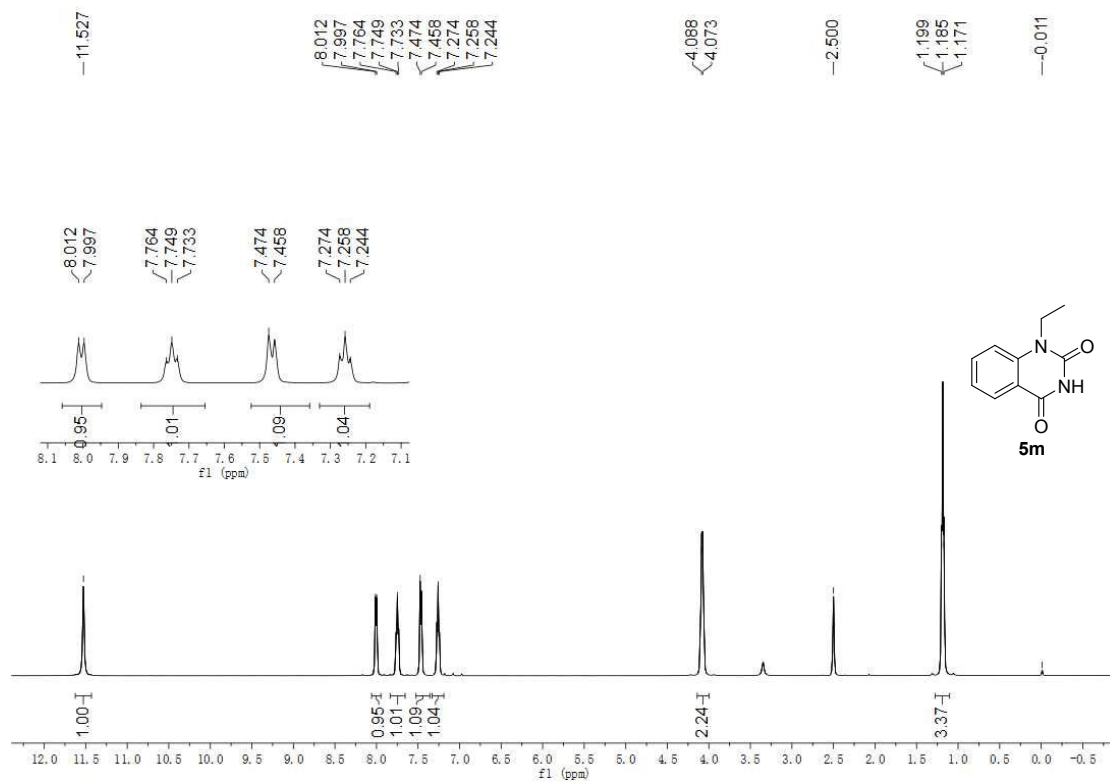

Figure S25.  $^1\text{H}$  NMR spectra of 1-ethylquinazoline-2,4(1H,3H)-dione (5m)

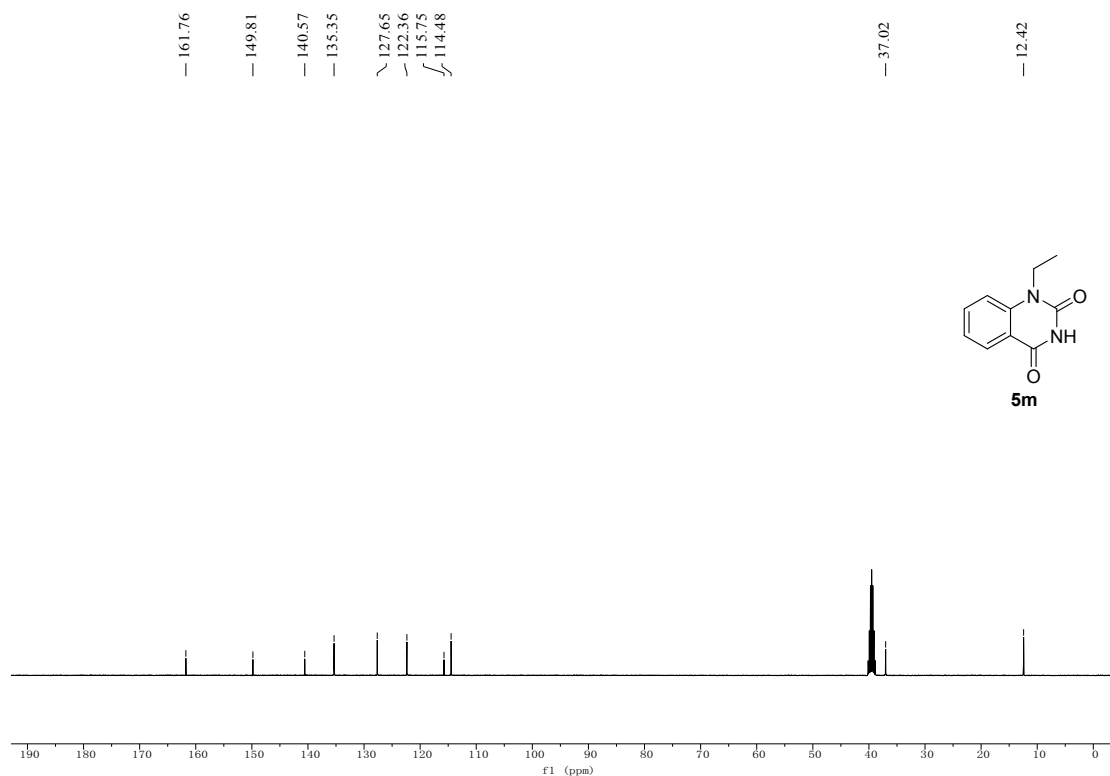

Figure S26.  $^{13}\text{C}$  NMR spectra of 1-ethylquinazoline-2,4(1H,3H)-dione (5m)

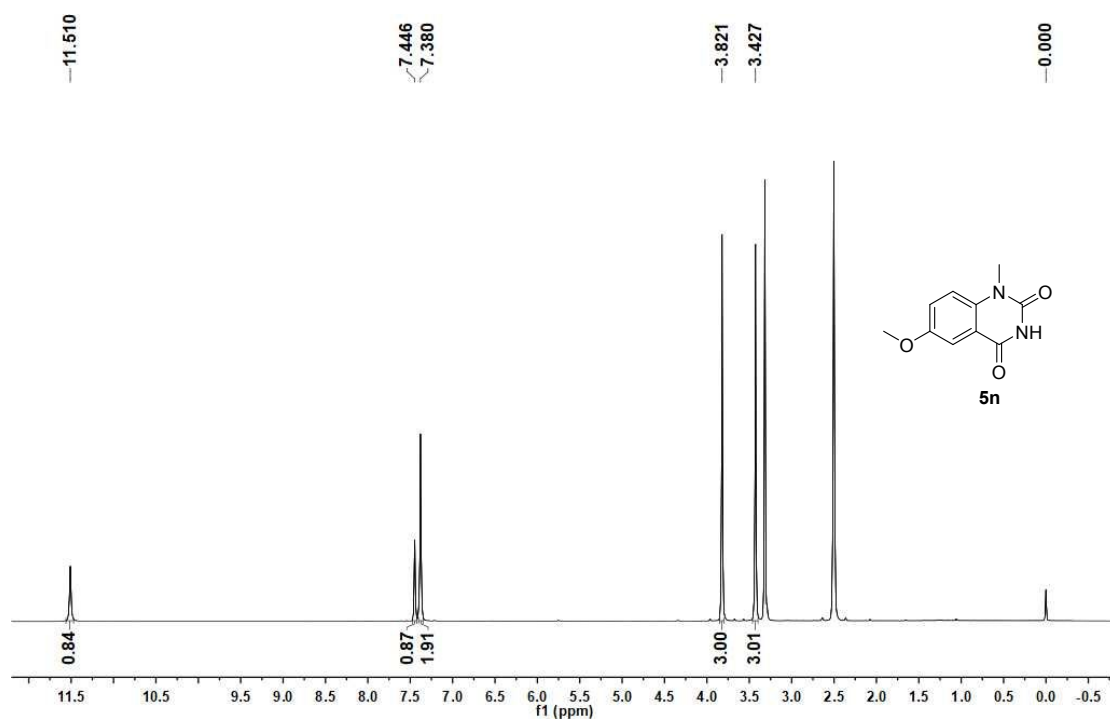

Figure S27.  $^1\text{H}$  NMR spectra of 6-methoxy-1-methylquinazoline-2,4(1H,3H)-dione (5n)

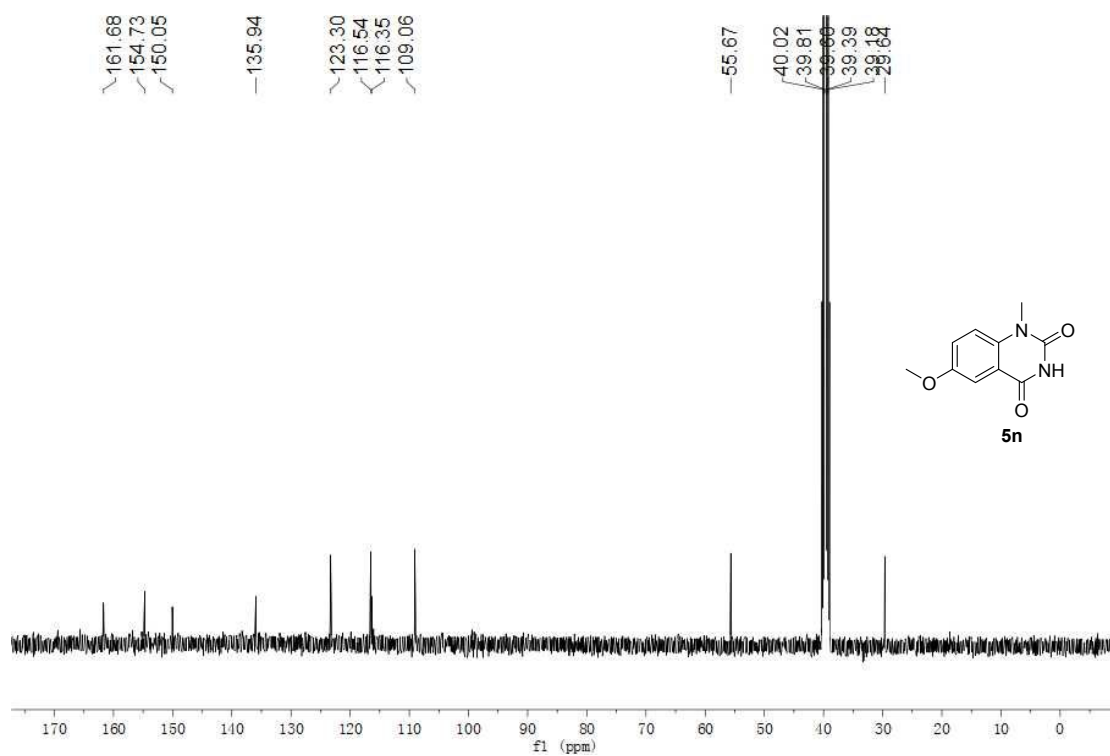

Figure S28.  $^{13}\text{C}$  NMR spectra of 6-methoxy-1-methylquinazoline-2,4(1H,3H)-dione (5n)



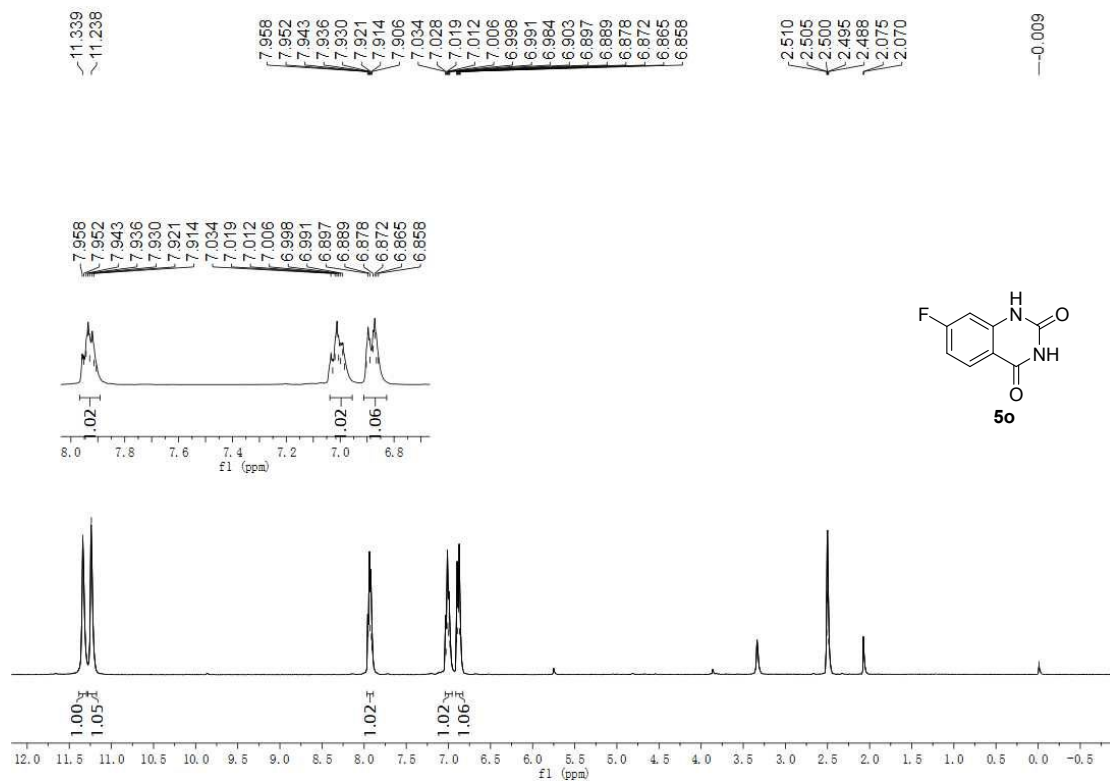

Figure S29. <sup>1</sup>H NMR spectra of 7-fluoroquinazoline-2,4(1H,3H)-dione (5o)

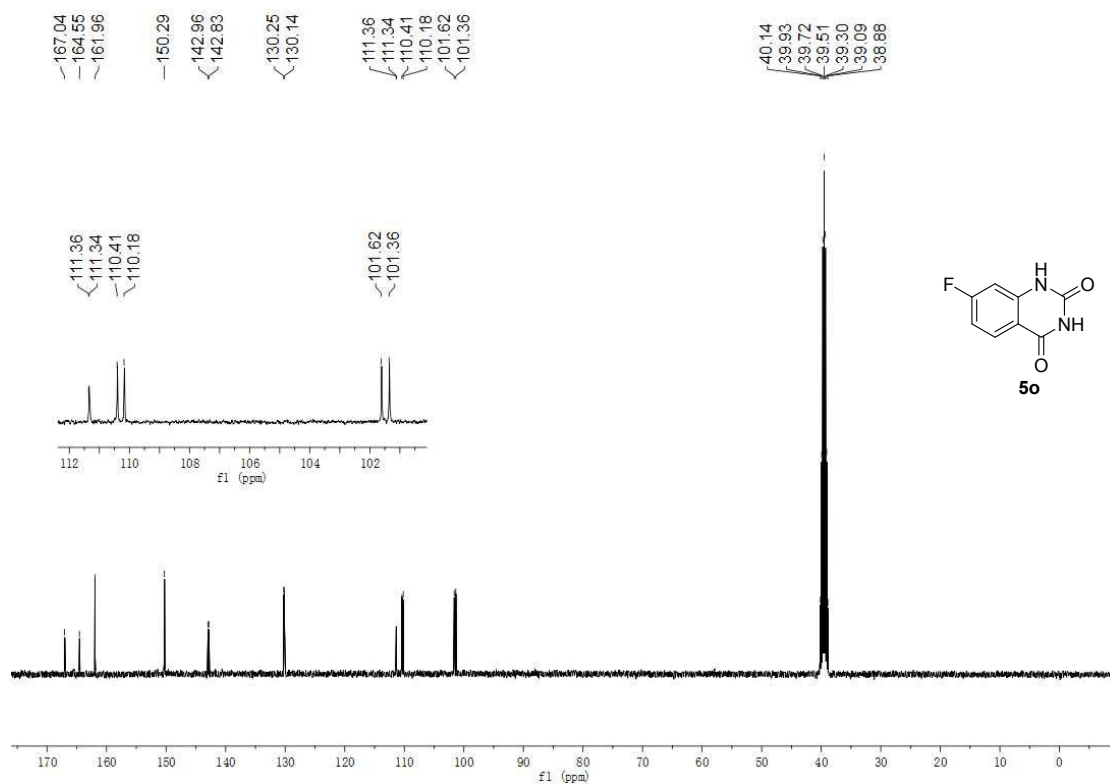

Figure S30. <sup>13</sup>C NMR spectra of 7-fluoroquinazoline-2,4(1H,3H)-dione (5o)

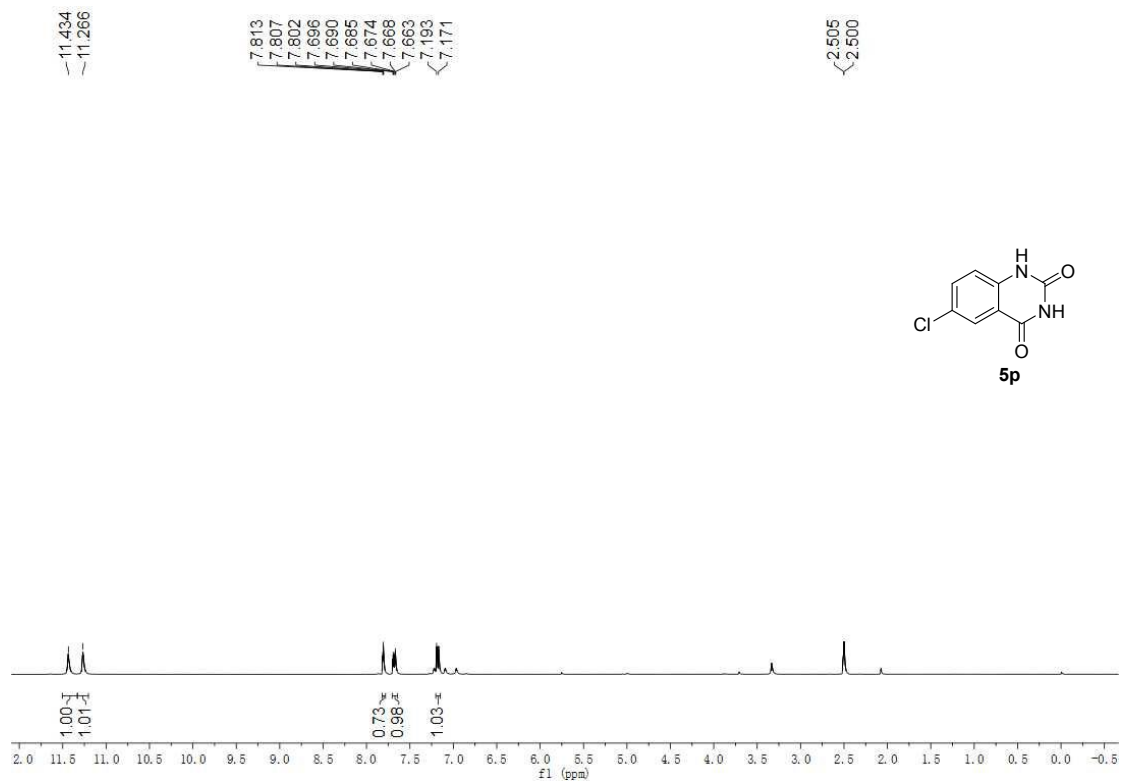

Figure S31. <sup>1</sup>H NMR spectra of 6-chloroquinazoline-2,4(1H,3H)-dione (5p)

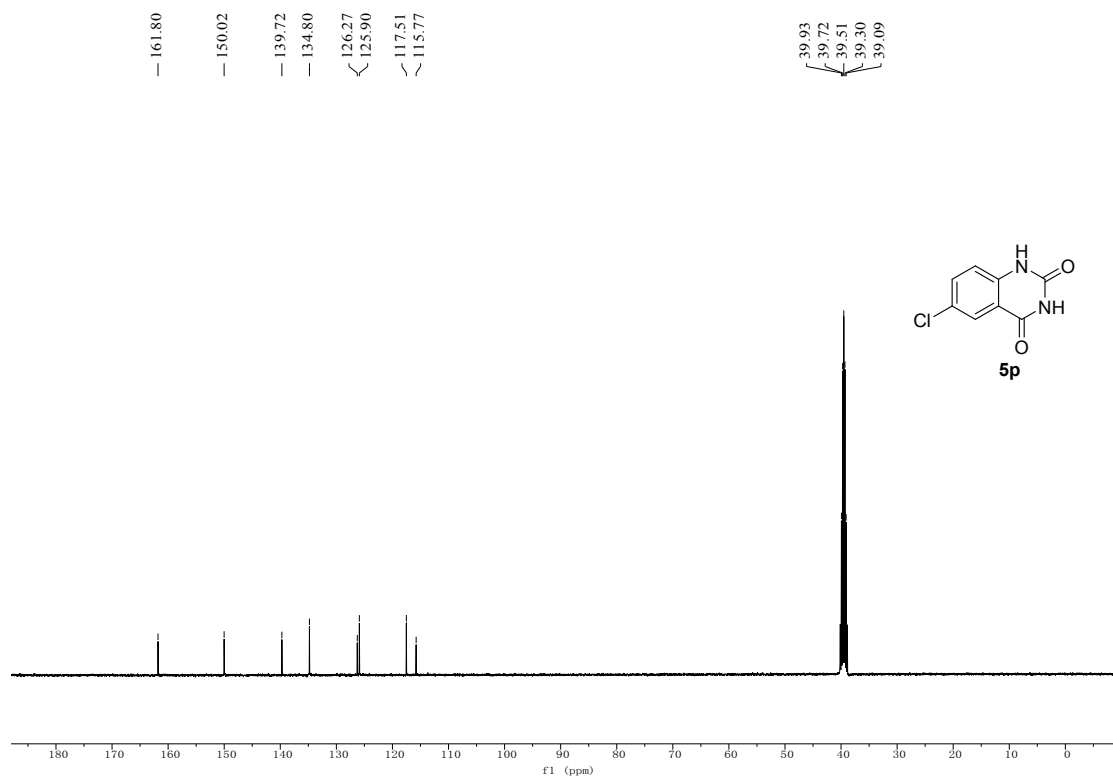

Figure S32. <sup>13</sup>C NMR spectra of 6-chloroquinazoline-2,4(1H,3H)-dione (5p)

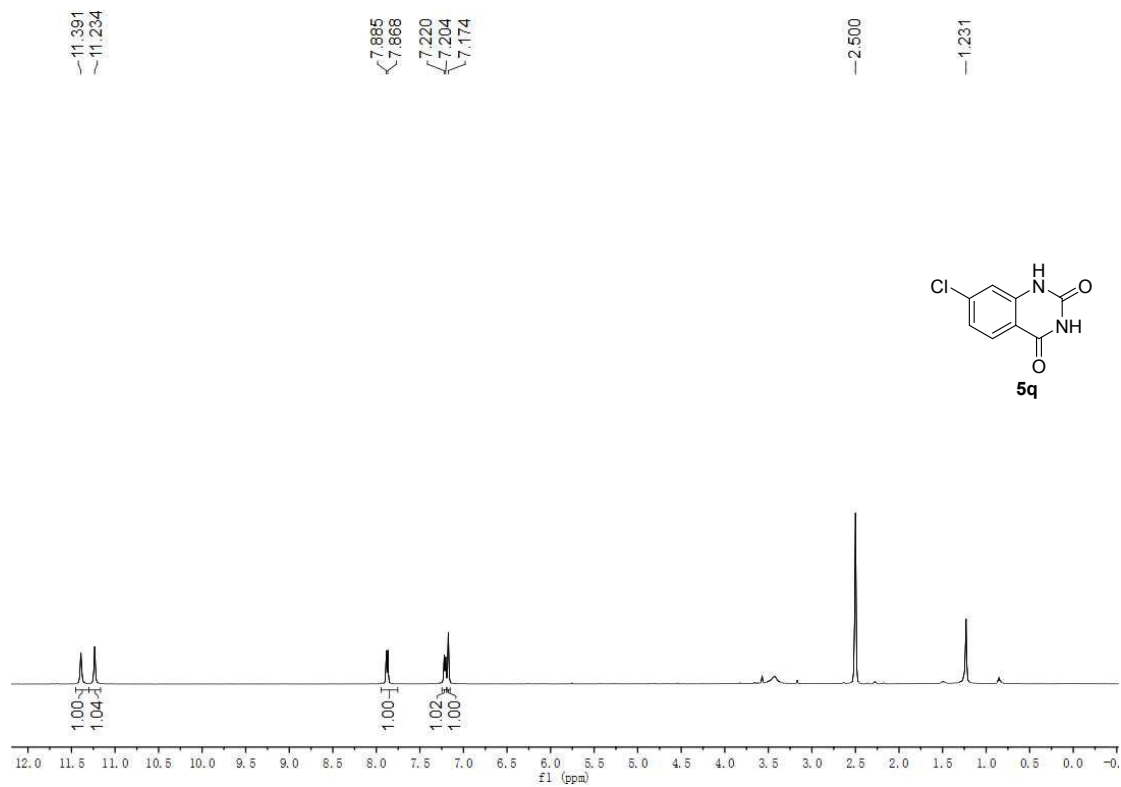

Figure S33. <sup>1</sup>H NMR spectra of 7-chloroquinazoline-2,4(1H,3H)-dione (5q)

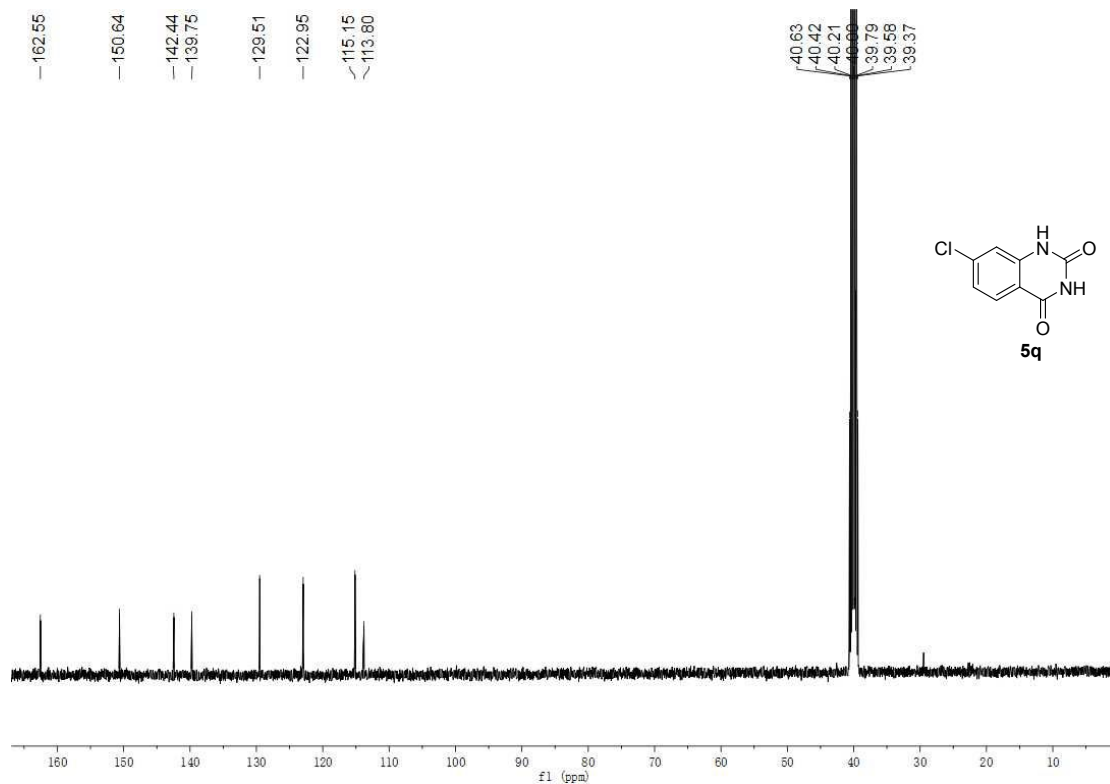

Figure S34. <sup>13</sup>C NMR spectra of 7-chloroquinazoline-2,4(1H,3H)-dione (5q)

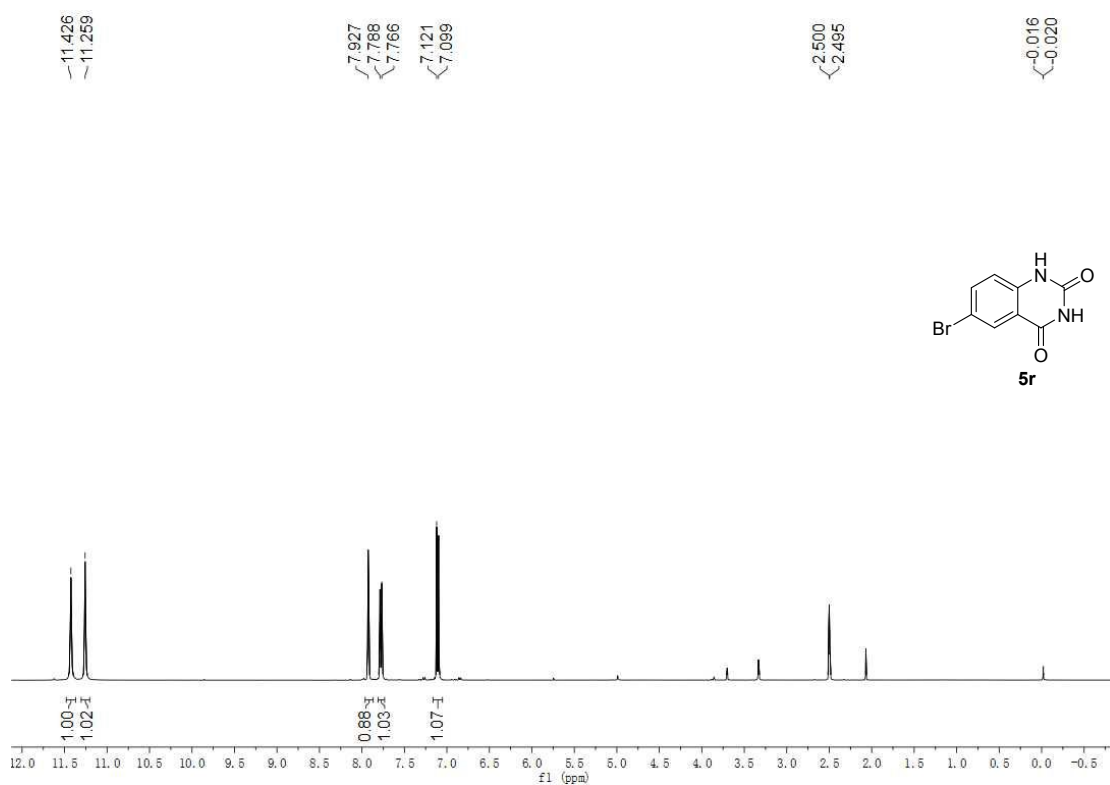

Figure S35.  $^1\text{H}$  NMR spectra of 6-bromoquinazoline-2,4(1*H*,3*H*)-dione (5r)

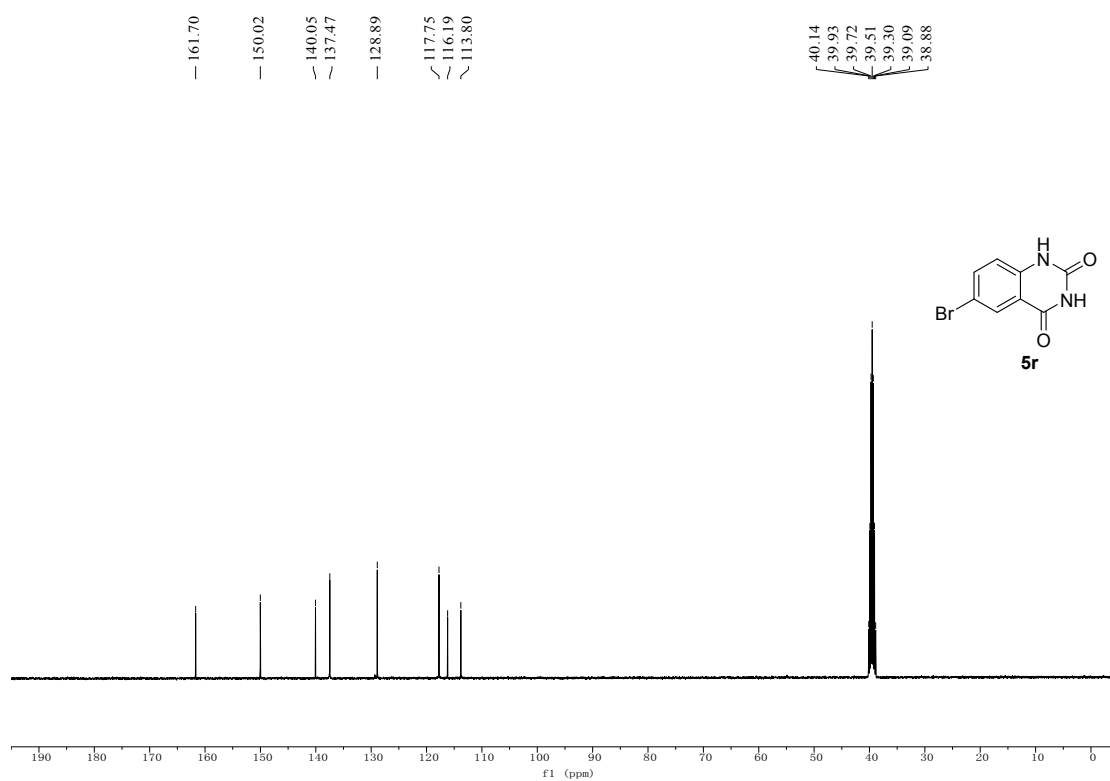

Figure S36.  $^{13}\text{C}$  NMR spectra of 6-bromoquinazoline-2,4(1*H*,3*H*)-dione (5r)

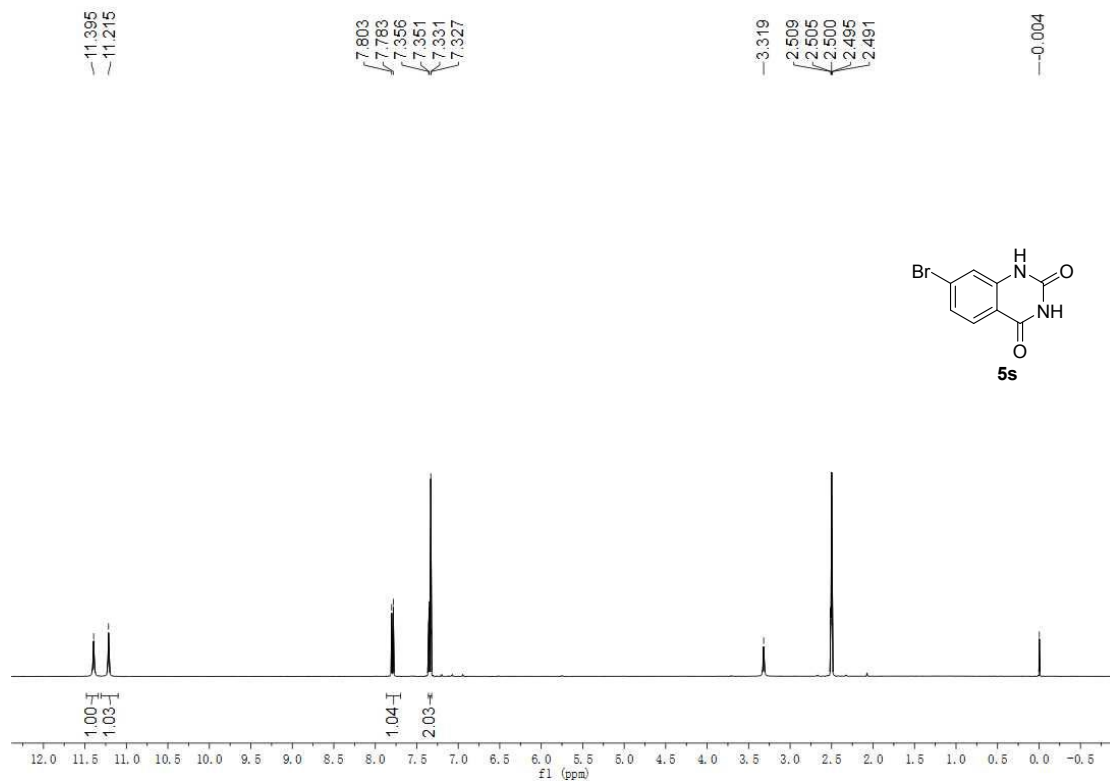

Figure S37. <sup>1</sup>H NMR spectra of 7-bromoquinazoline-2,4(1H,3H)-dione (5s)

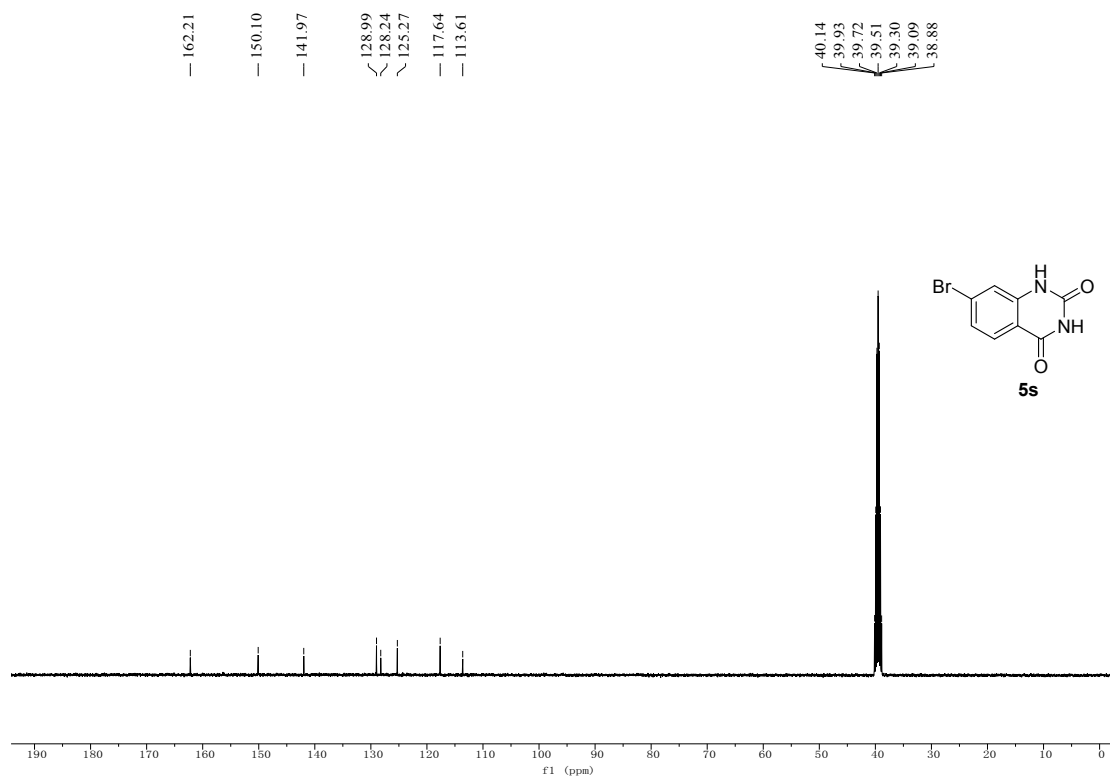

Figure S38. <sup>13</sup>C NMR spectra of 7-bromoquinazoline-2,4(1H,3H)-dione (5s)

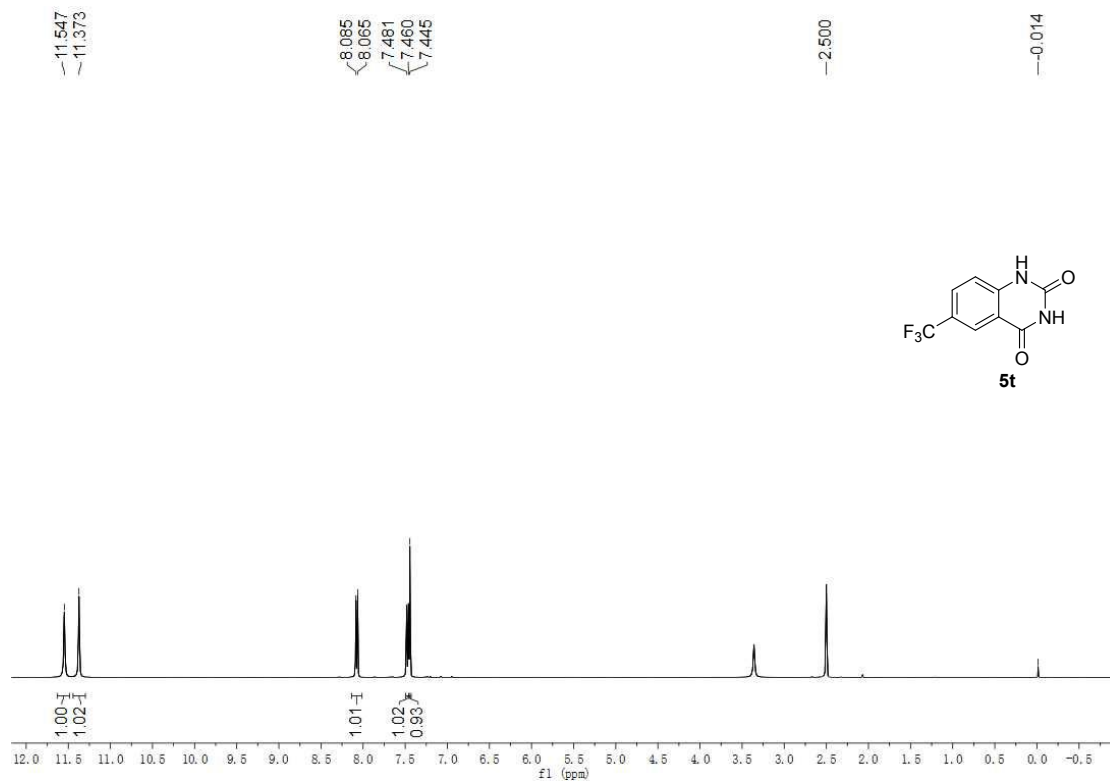

Figure S39.  $^1\text{H}$  NMR spectra of 6-(trifluoromethyl)quinazoline-2,4(1H,3H)-dione (5t)

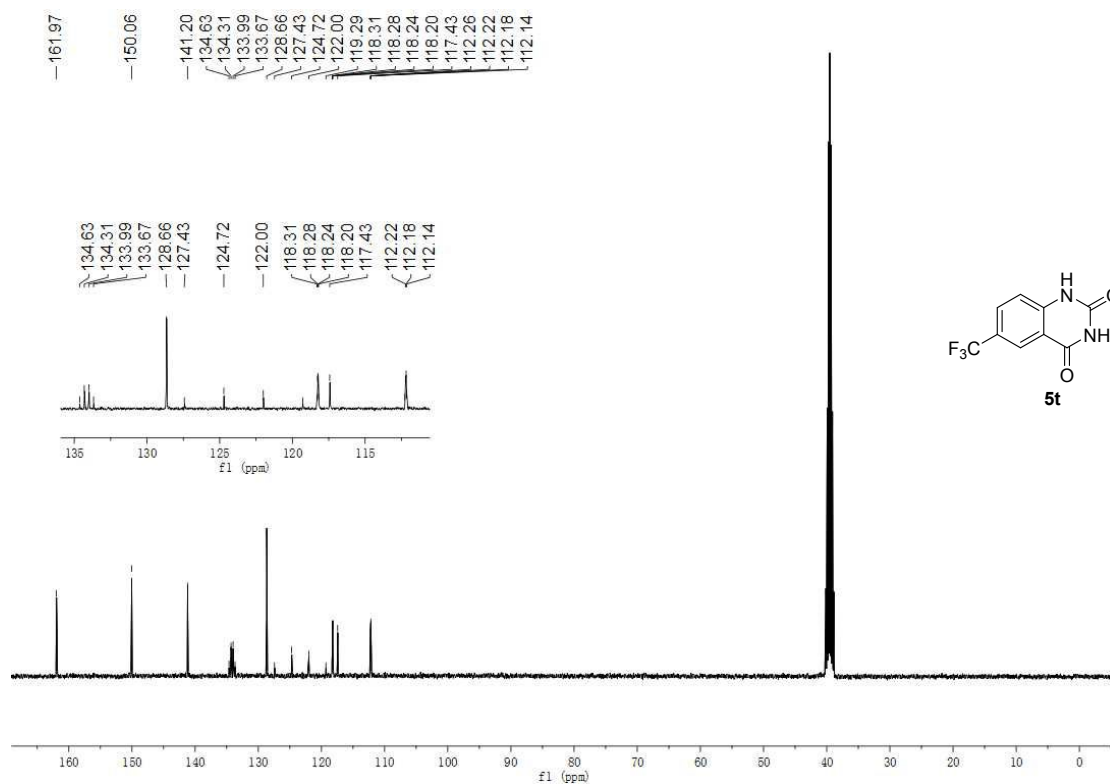

Figure S40.  $^{13}\text{C}$  NMR spectra of 6-(trifluoromethyl)quinazoline-2,4(1H,3H)-dione (5t)

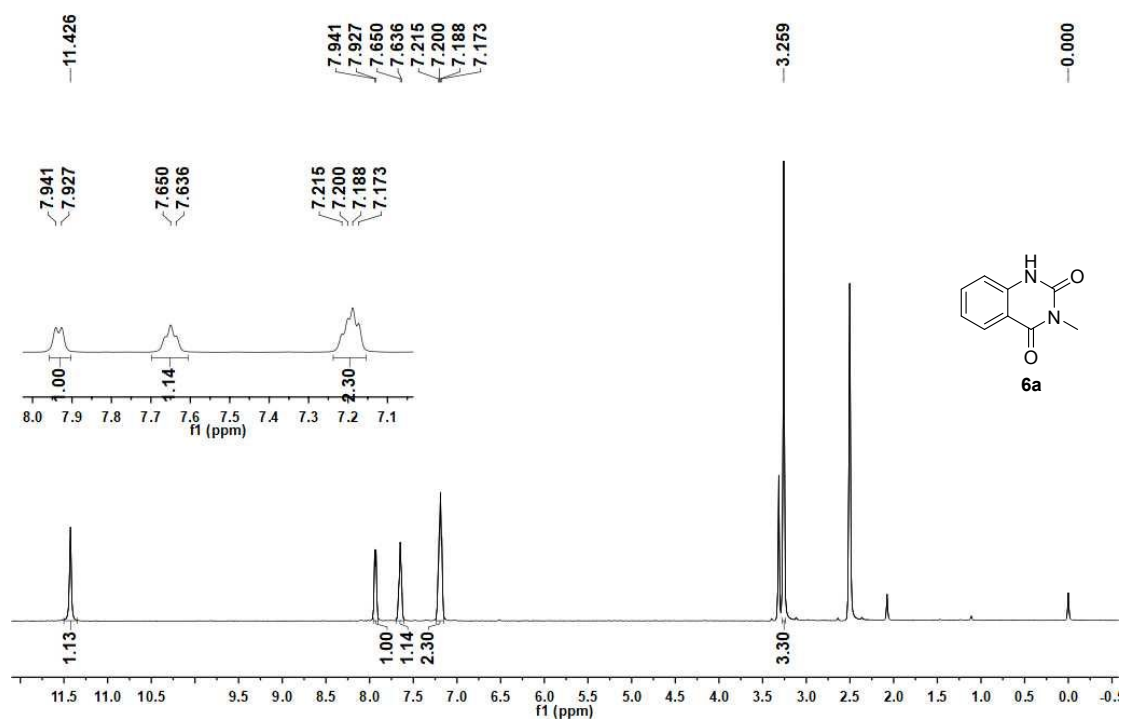

Figure S41.  $^1\text{H}$  NMR spectra of 3-methylquinazoline-2,4(1H,3H)-dione (6a)

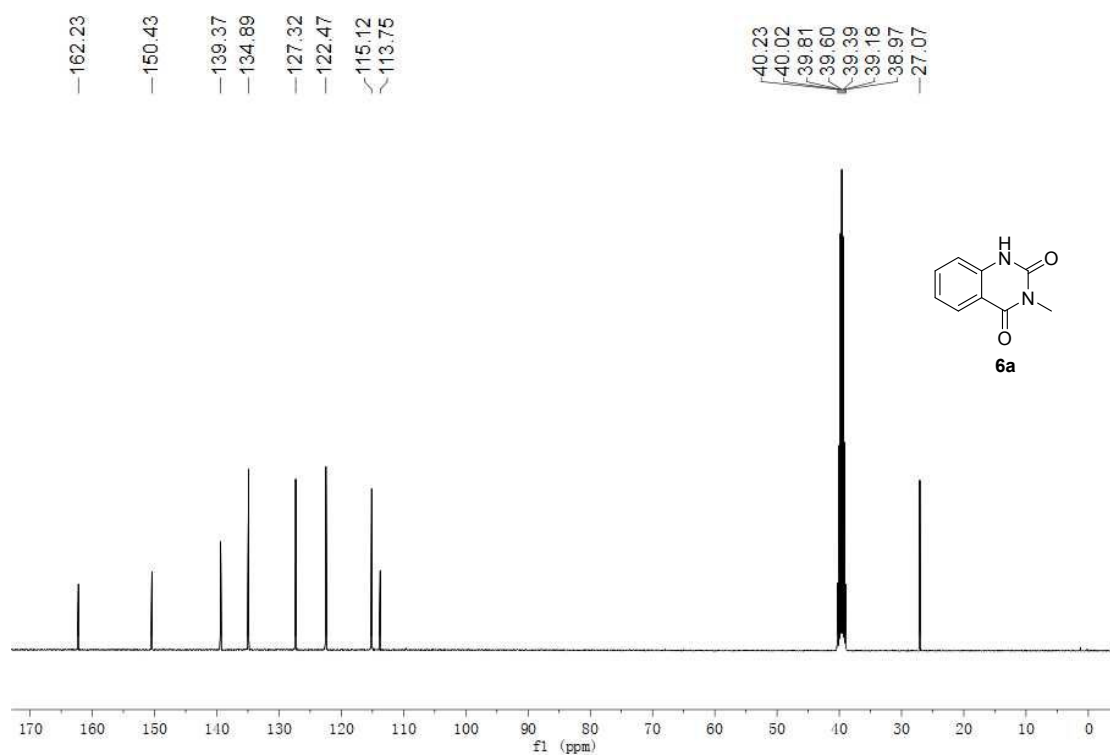

Figure S42.  $^{13}\text{C}$  NMR spectra of 3-methylquinazoline-2,4(1H,3H)-dione (6a)

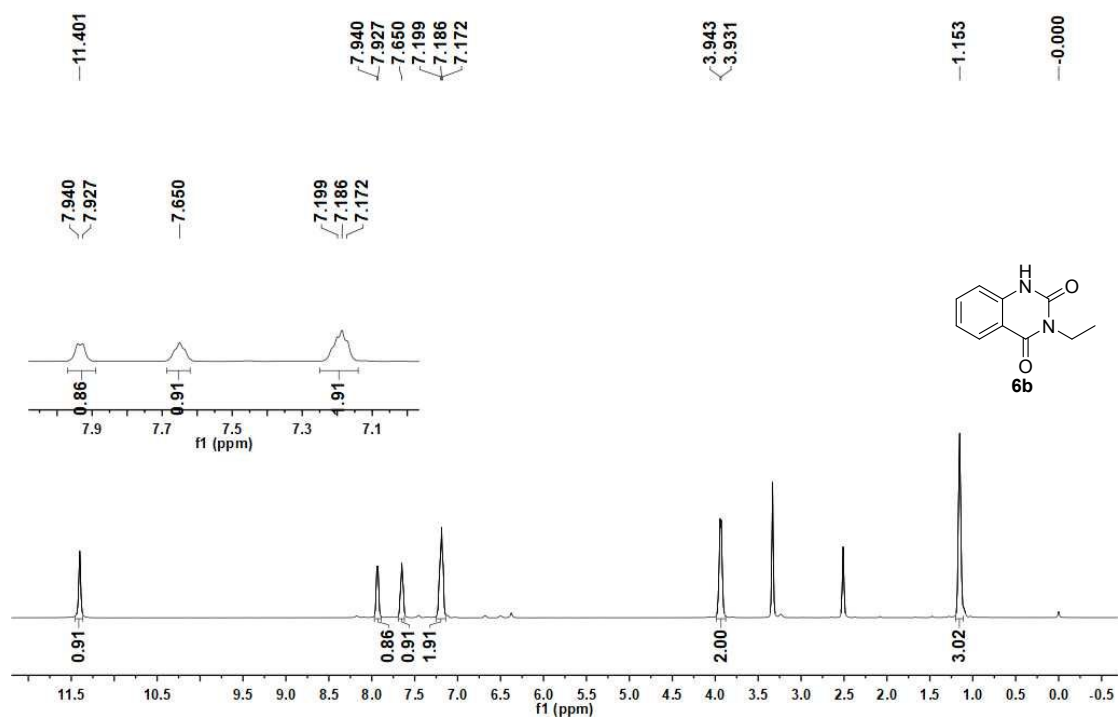

**Figure S43. <sup>1</sup>H NMR spectra of 3-ethylquinazoline-2,4(1*H*,3*H*)-dione (6b)**

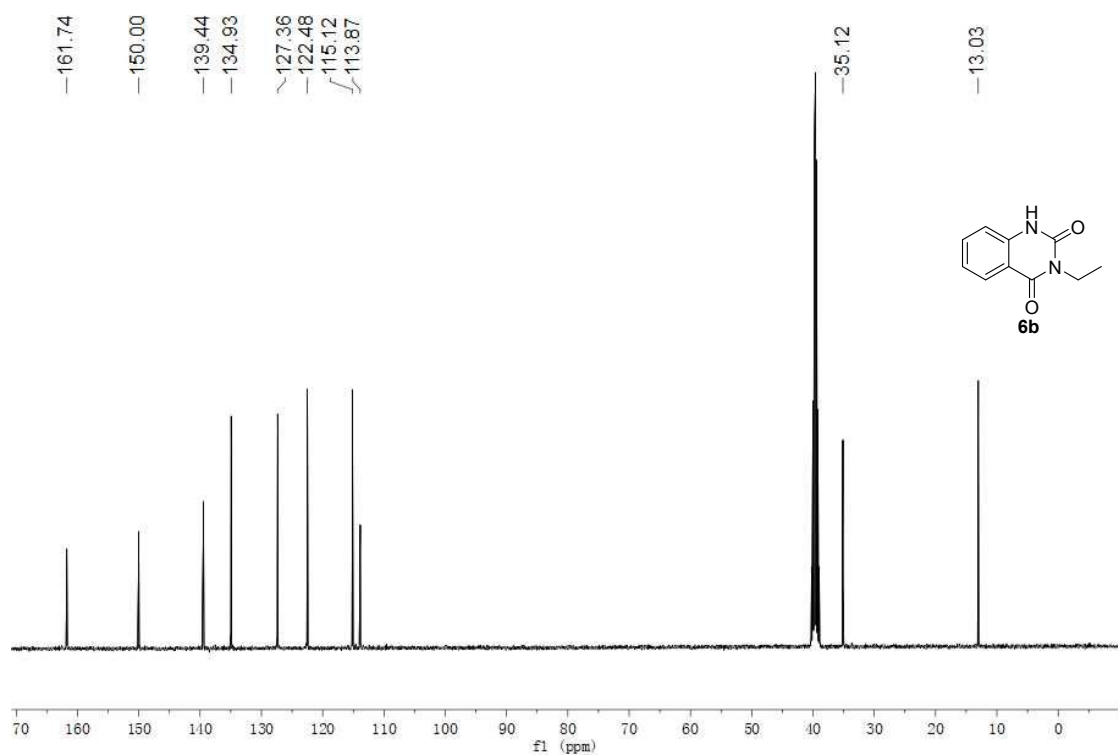

**Figure S44. <sup>13</sup>C NMR spectra of 3-ethylquinazoline-2,4(1*H*,3*H*)-dione (6b)**



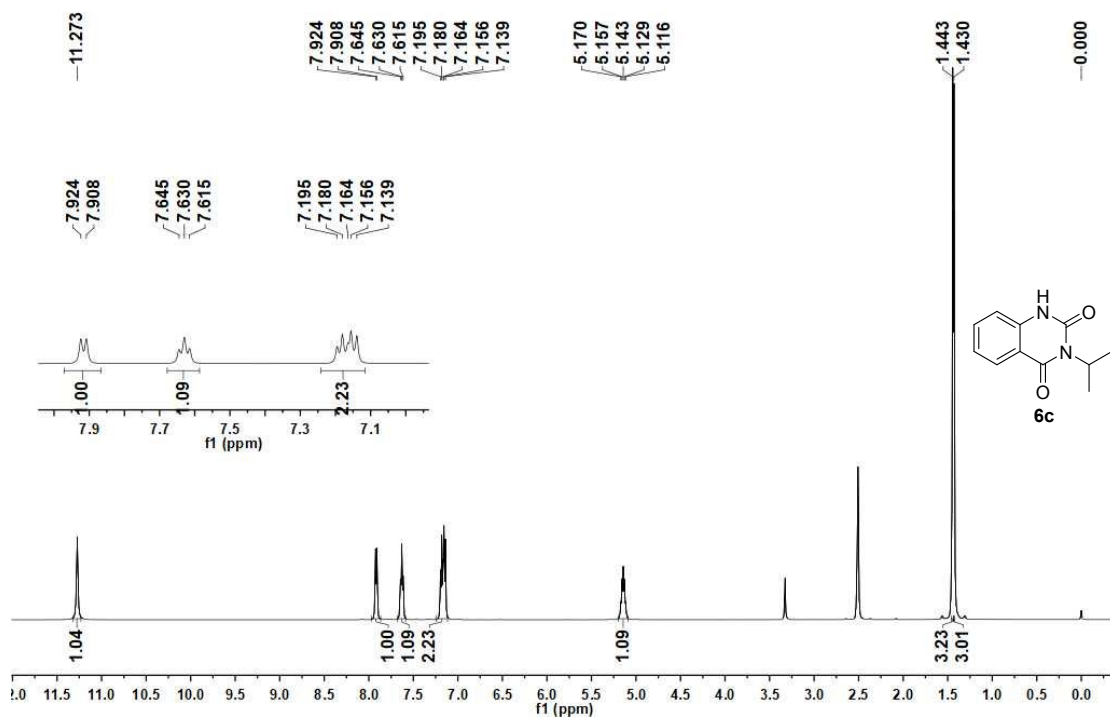

Figure S45.  $^1\text{H}$  NMR spectra of 3-isopropylquinazoline-2,4(1H,3H)-dione (6c)

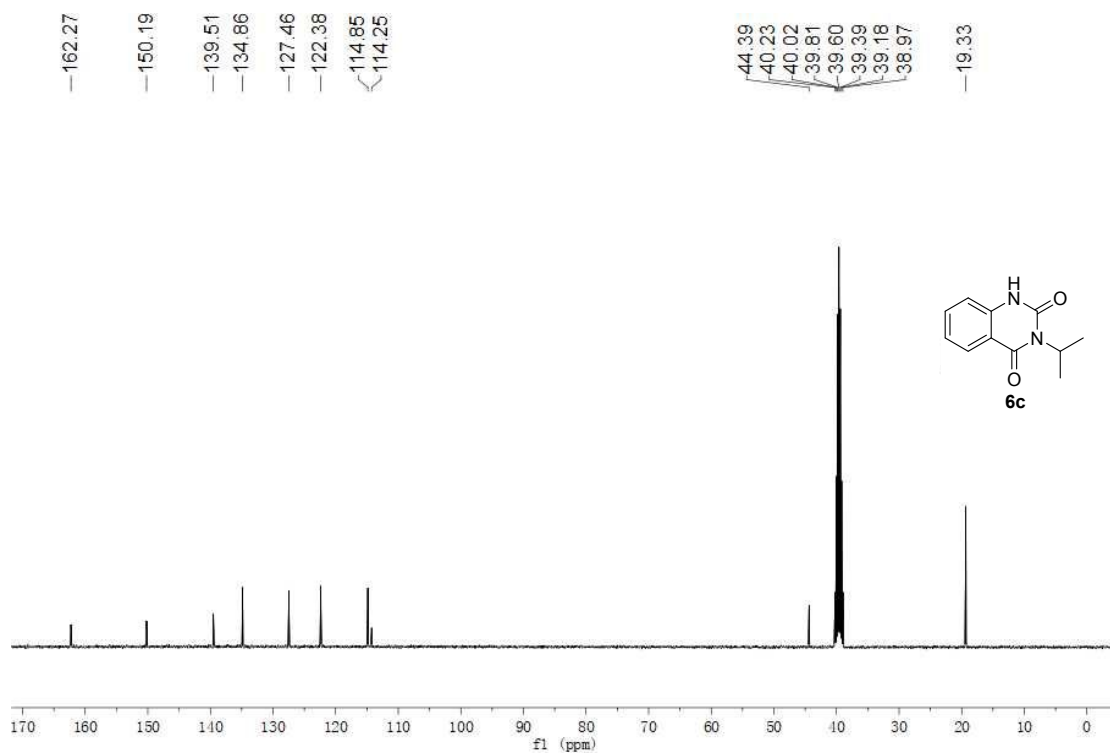

Figure S46.  $^{13}\text{C}$  NMR spectra of 3-isopropylquinazoline-2,4(1H,3H)-dione (6c)

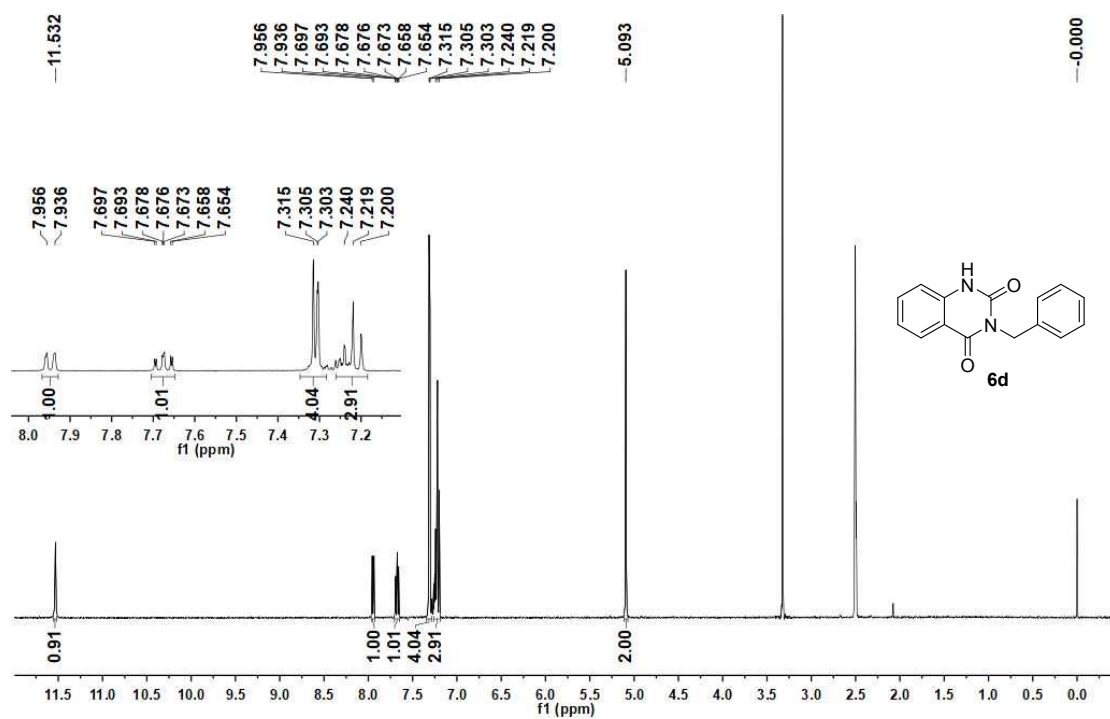

Figure S47.  $^1\text{H}$  NMR spectra of 3-benzylquinazoline-2,4(1H,3H)-dione (6d)

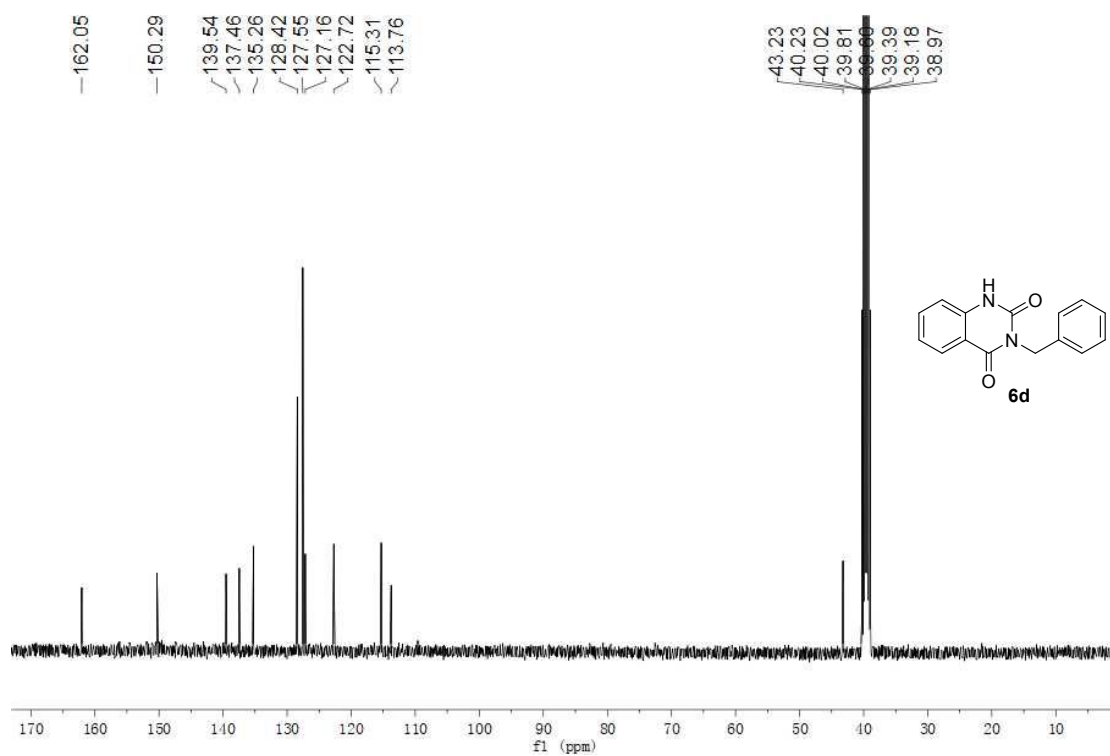

Figure S48.  $^{13}\text{C}$  NMR spectra of 3-benzylquinazoline-2,4(1H,3H)-dione (6d)

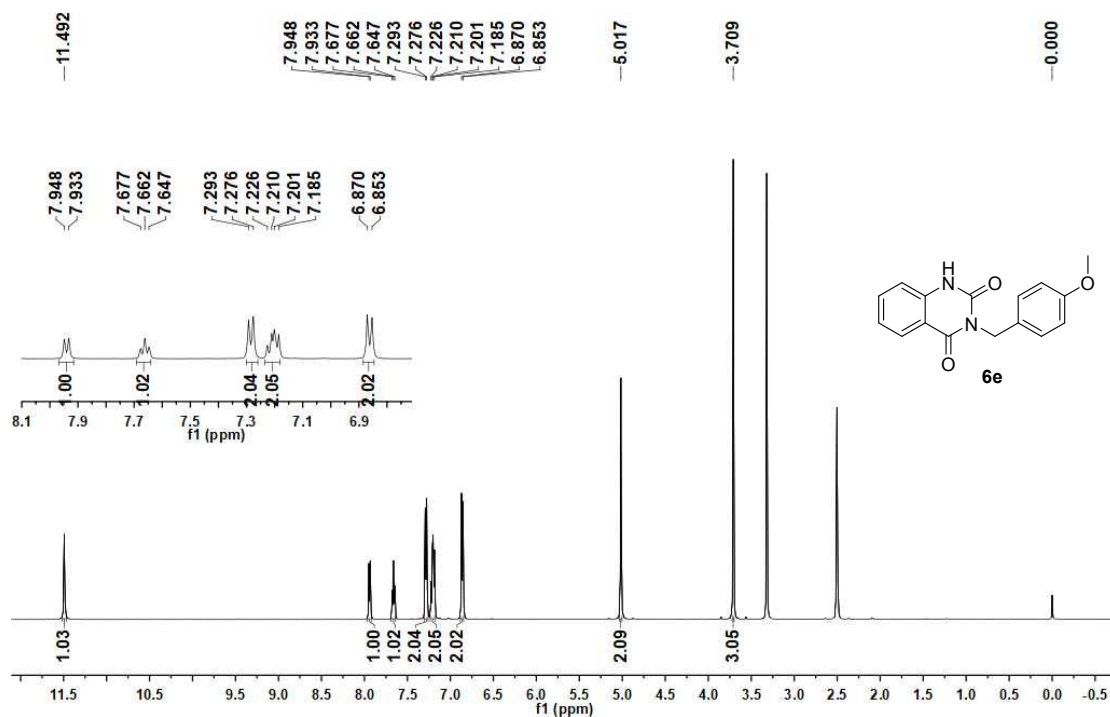

Figure S49. <sup>1</sup>H and spectra of 3-(4-methoxybenzyl)quinazoline-2,4(1*H*,3*H*)-dione (6e)

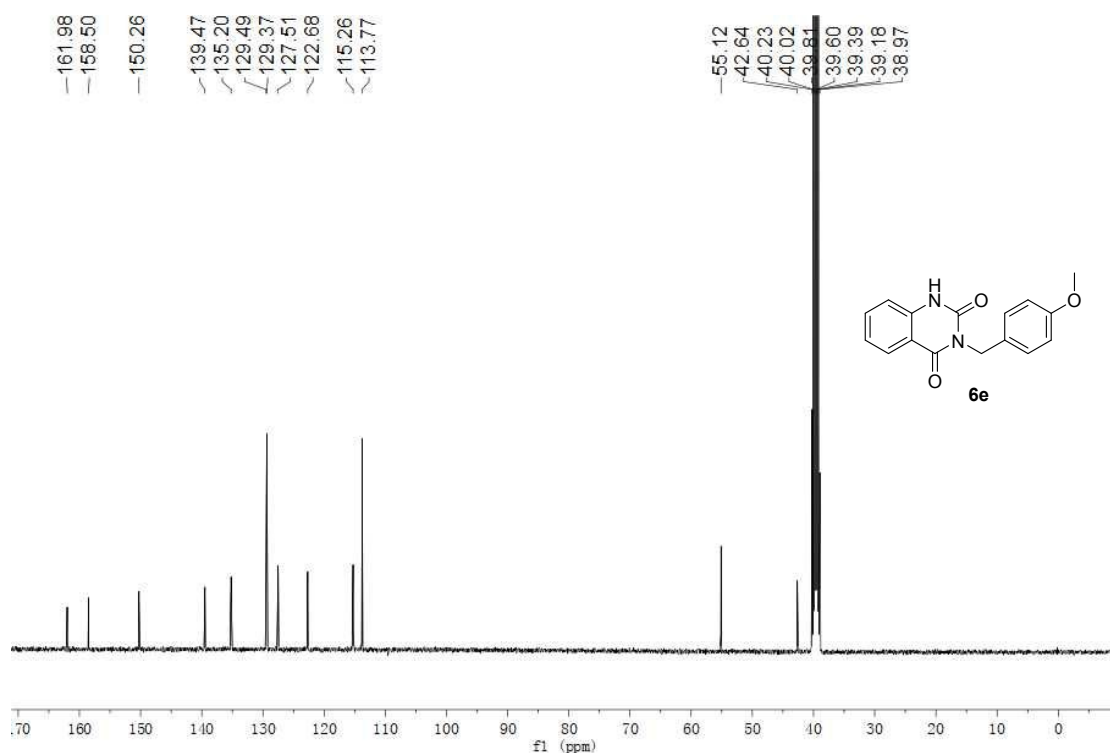

Figure S50. <sup>13</sup>C NMR spectra of 3-(4-methoxybenzyl)quinazoline-2,4(1*H*,3*H*)-dione (6e)

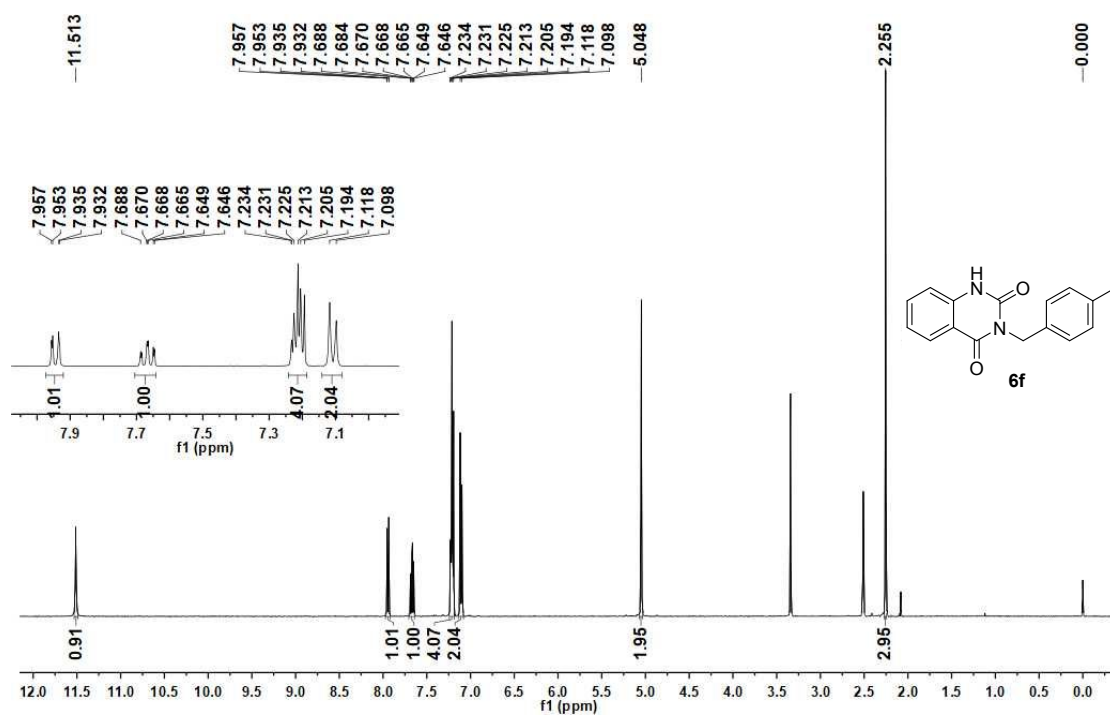

Figure S51. <sup>1</sup>H NMR spectra of 3-(4-methylbenzyl)quinazoline-2,4(1H,3H)-dione (6f)

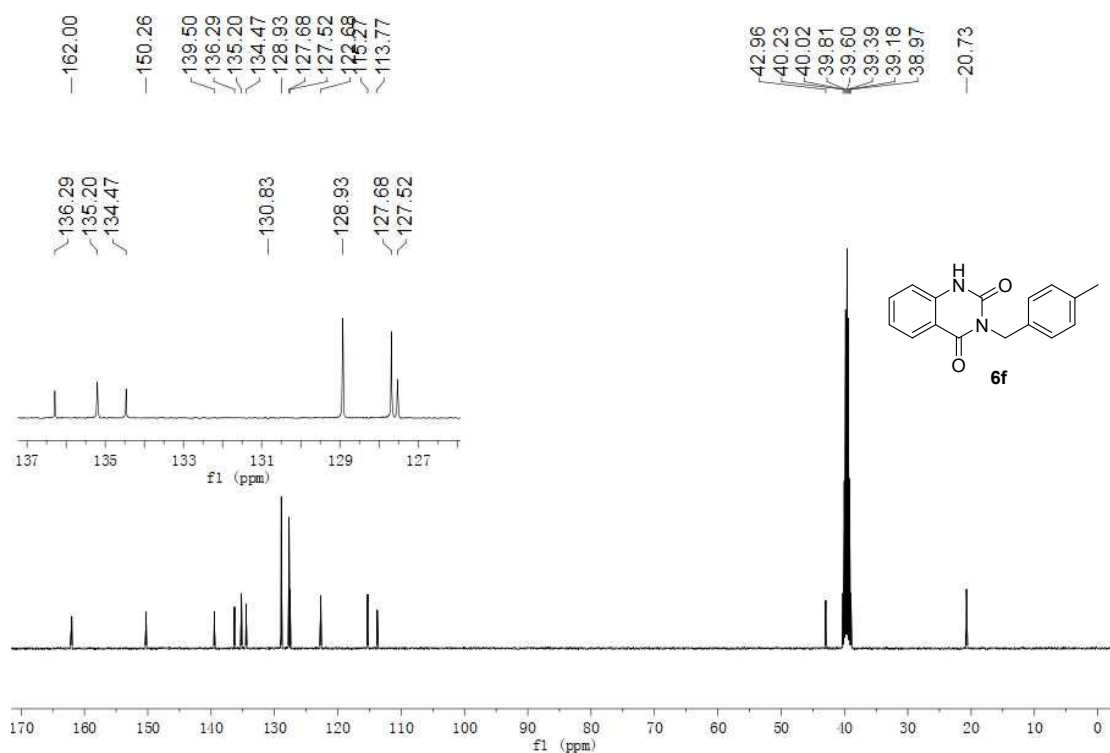

Figure S52. <sup>13</sup>C NMR spectra of 3-(4-methylbenzyl)quinazoline-2,4(1H,3H)-dione (6f)

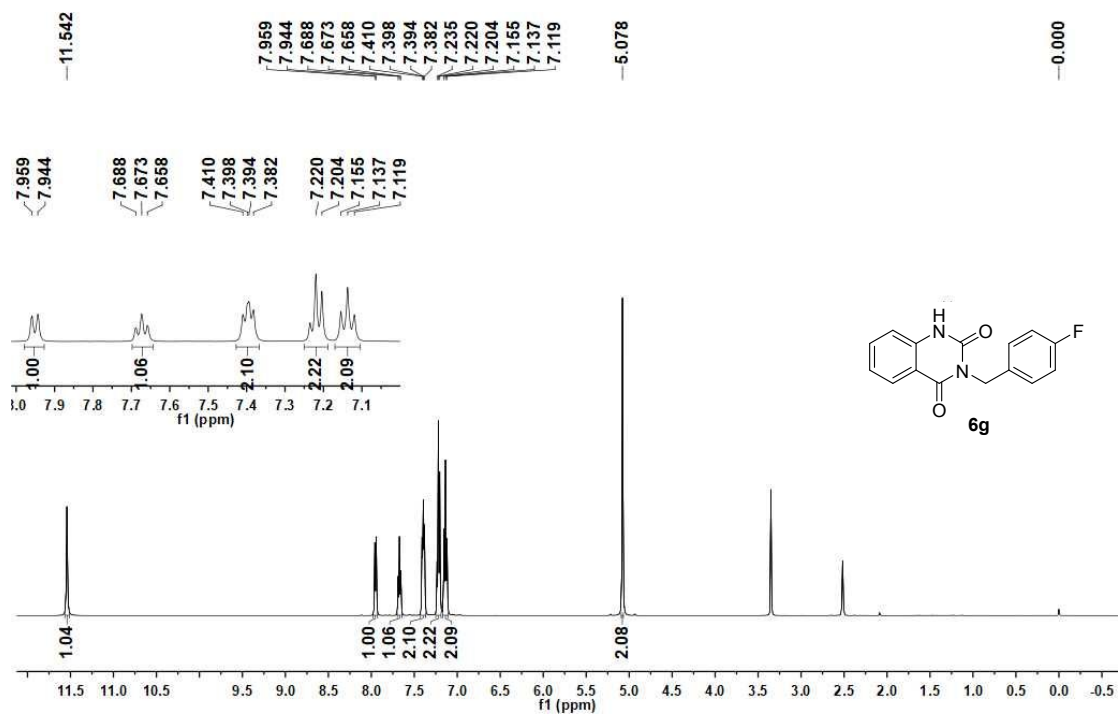

Figure S53. <sup>1</sup>H NMR spectra of 3-(4-fluorobenzyl)quinazoline-2,4(1*H*,3*H*)-dione (6g)

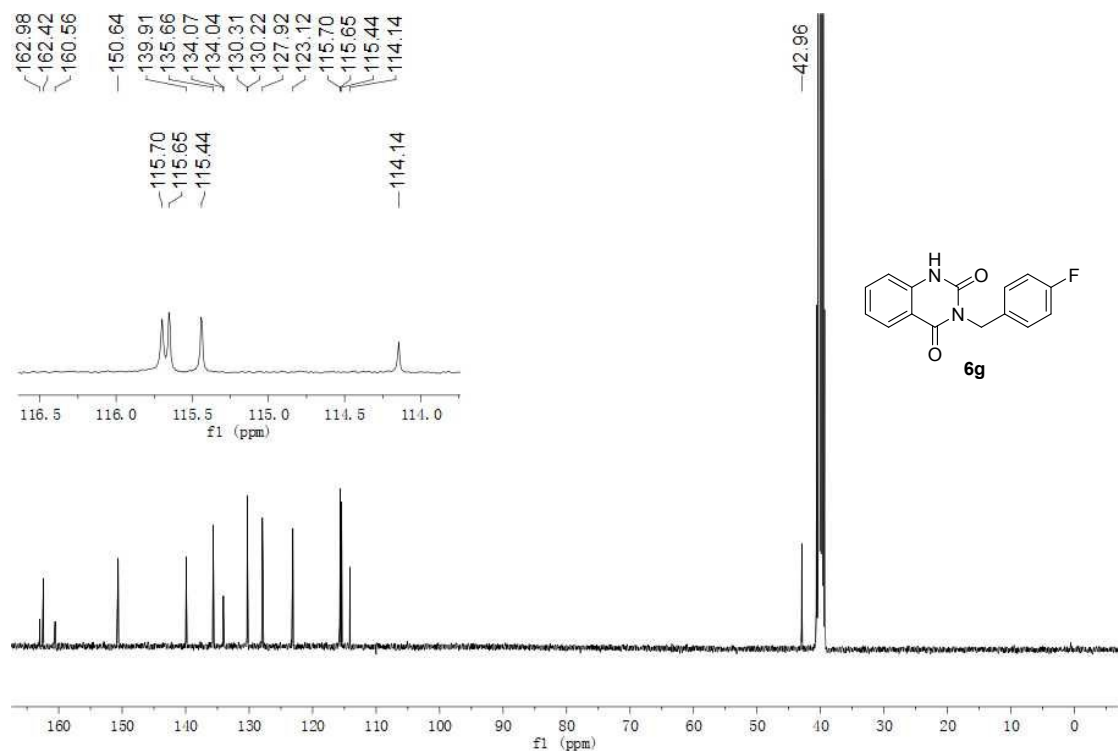

Figure S54. <sup>13</sup>C NMR spectra of 3-(4-fluorobenzyl)quinazoline-2,4(1*H*,3*H*)-dione (6g)

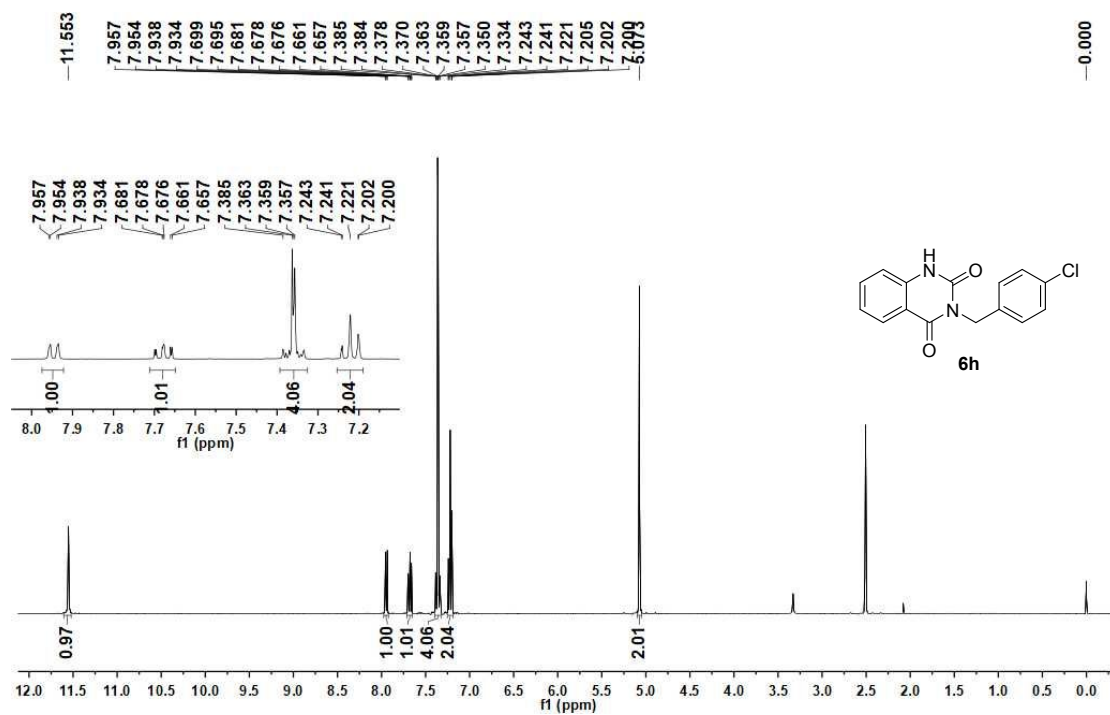

Figure S55. <sup>1</sup>H NMR spectra of 3-(4-chlorobenzyl)quinazoline-2,4(1H,3H)-dione (6h)

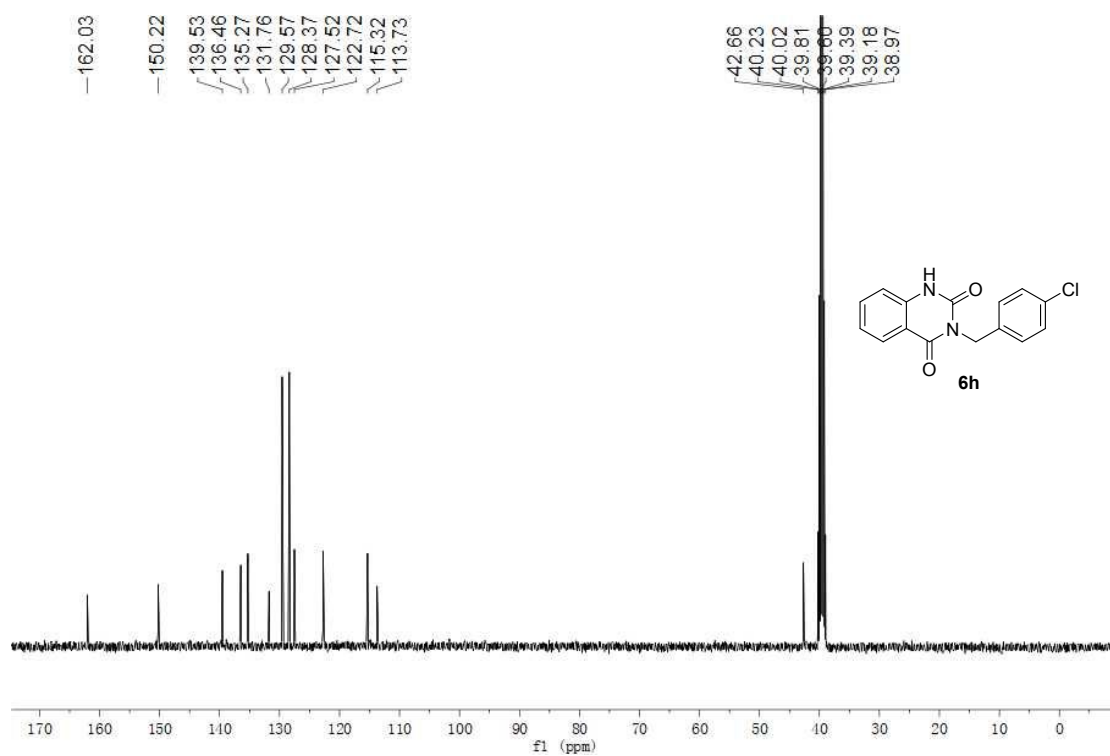

Figure S56. <sup>13</sup>C NMR spectra of 3-(4-chlorobenzyl)quinazoline-2,4(1H,3H)-dione (6h)

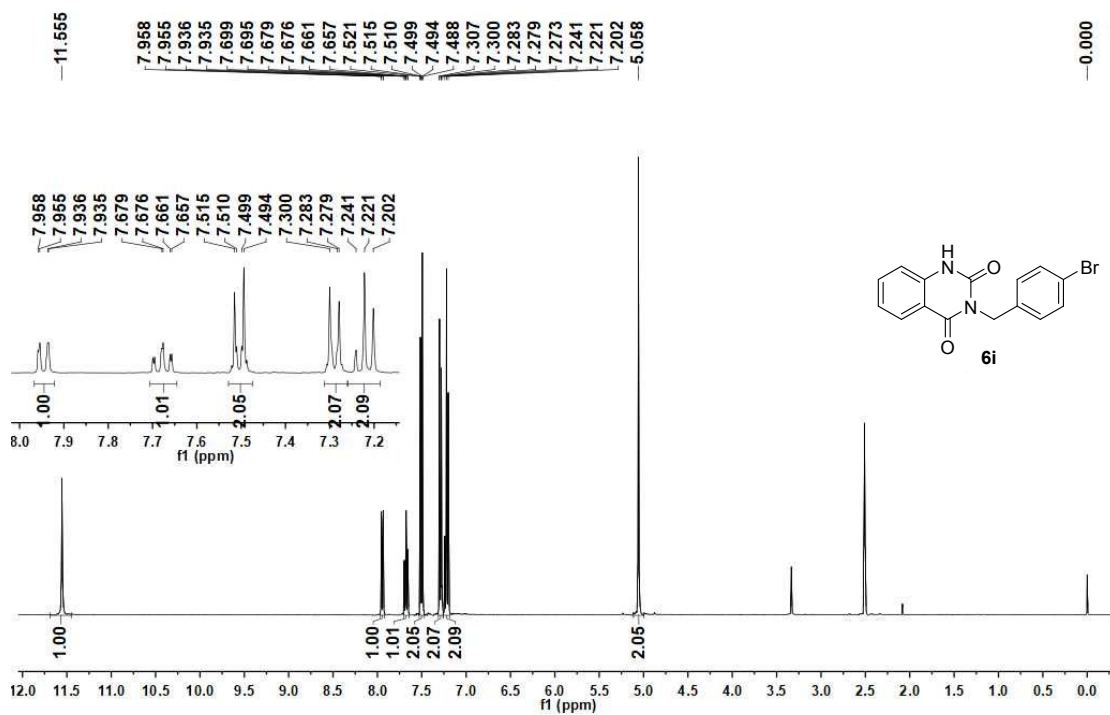

Figure S57. <sup>1</sup>H NMR spectra of 3-(4-bromobenzyl)quinazoline-2,4(1H,3H)-dione (6i)

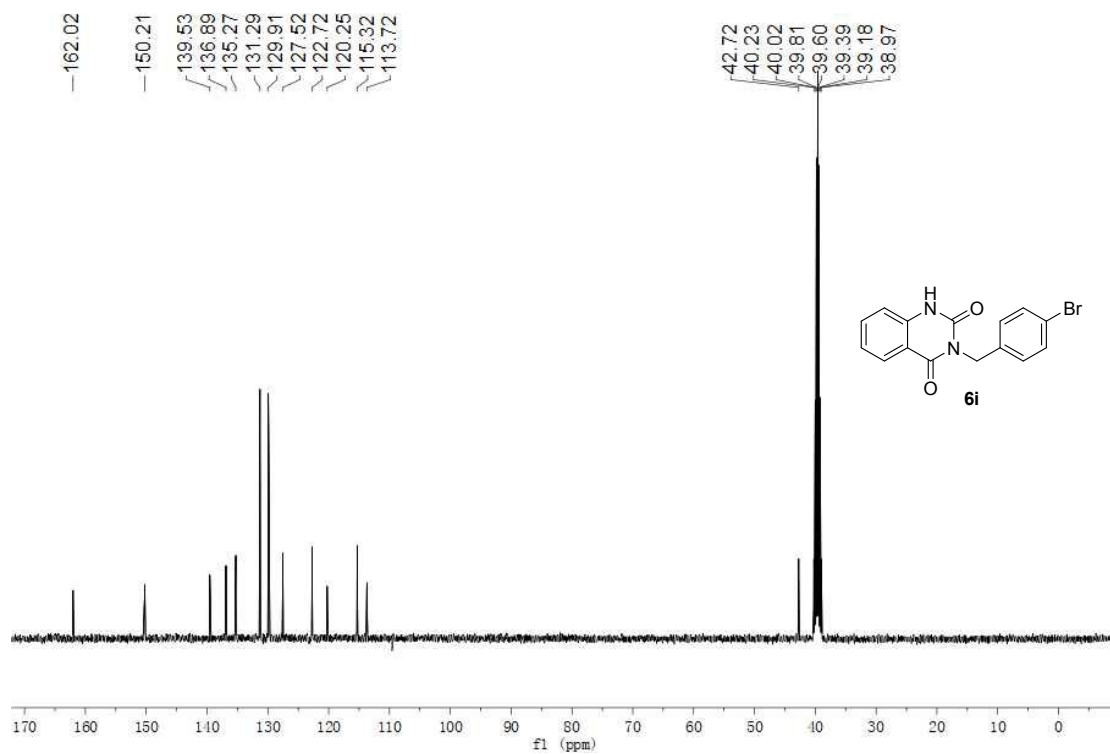

Figure S58. <sup>13</sup>C NMR spectra of 3-(4-bromobenzyl)quinazoline-2,4(1H,3H)-dione (6i)

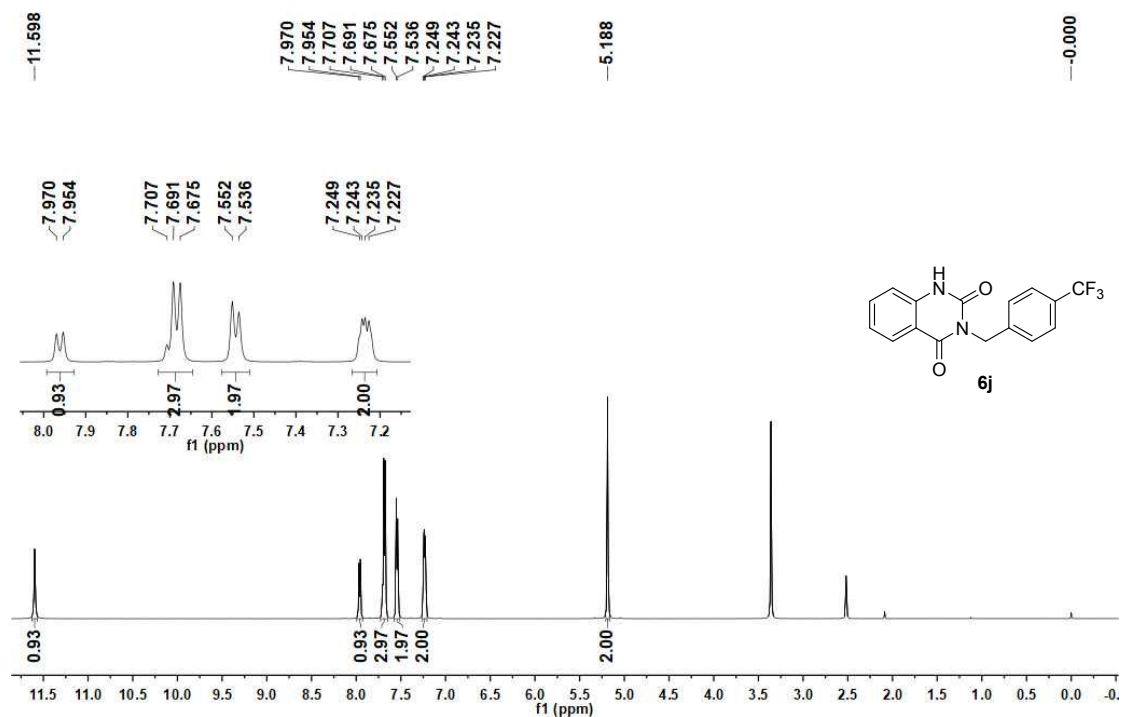

Figure S59. <sup>1</sup>H NMR spectra of 3-(4-(trifluoromethyl)benzyl)quinazoline-2,4(1H,3H)-dione (6j)

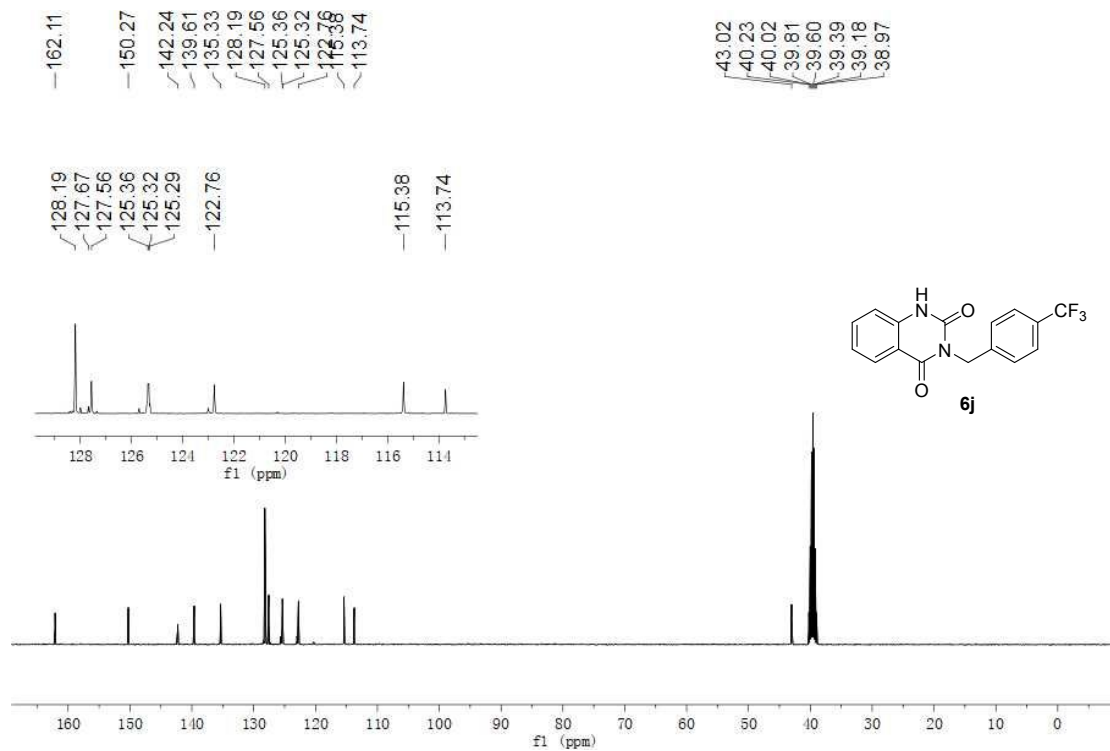

Figure S60. <sup>13</sup>C NMR spectra of 3-(4-(trifluoromethyl)benzyl)quinazoline-2,4(1H,3H)-dione (6j)



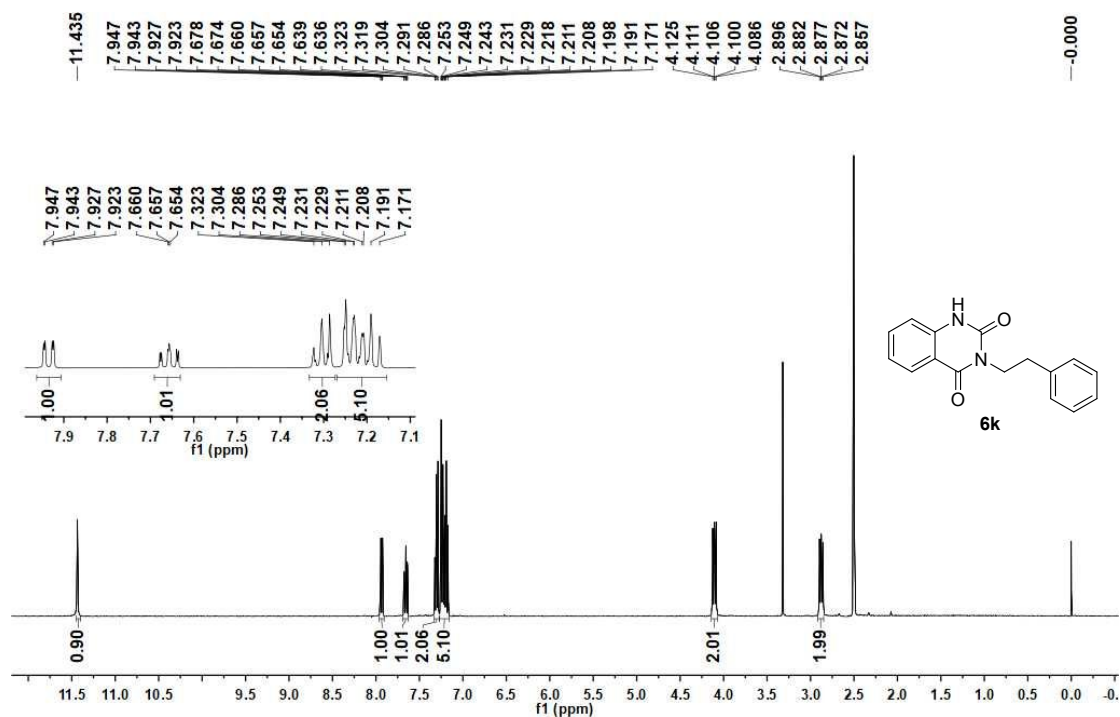

Figure S61. <sup>1</sup>H NMR spectra of 3-phenethylquinazoline-2,4(1H,3H)-dione (6k)

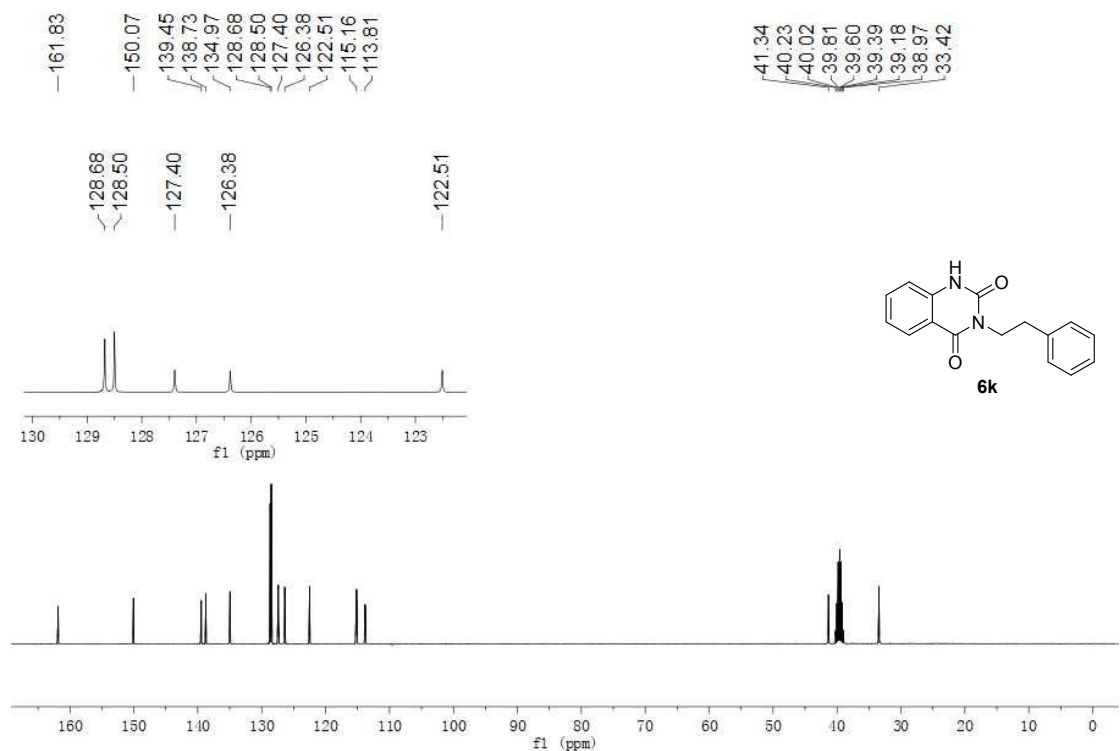

Figure S62. <sup>13</sup>C NMR spectra of 3-phenethylquinazoline-2,4(1H,3H)-dione (6k)

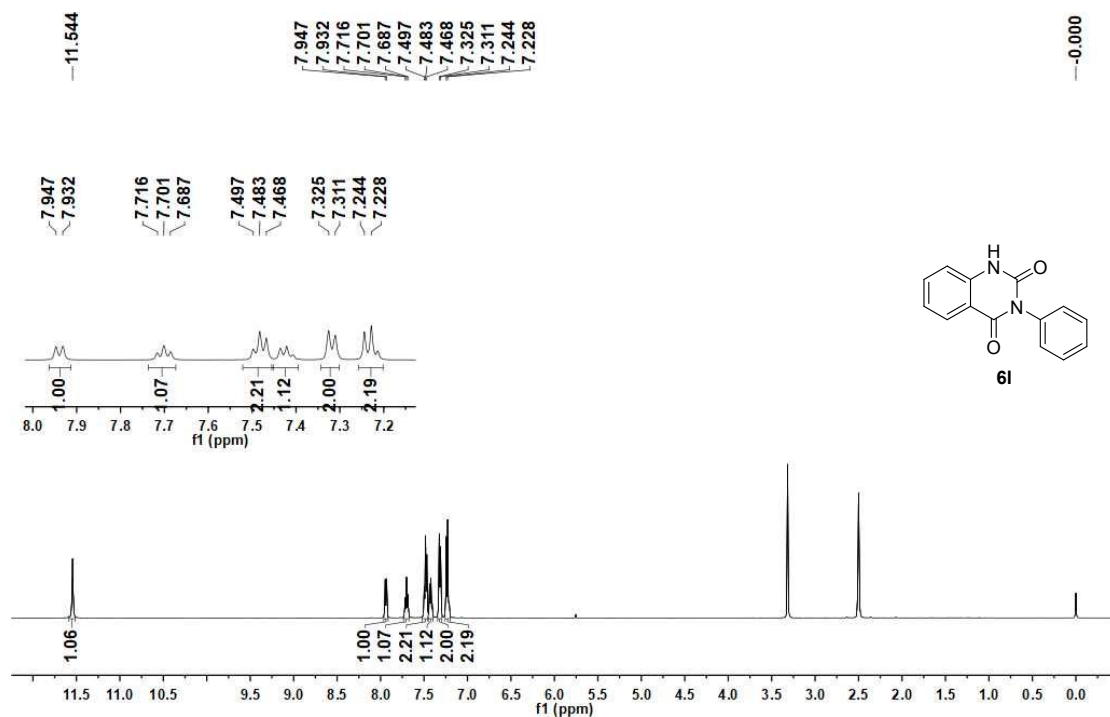

Figure S63. <sup>1</sup>H NMR spectra of 3-phenylquinazoline-2,4(1H,3H)-dione (6l)

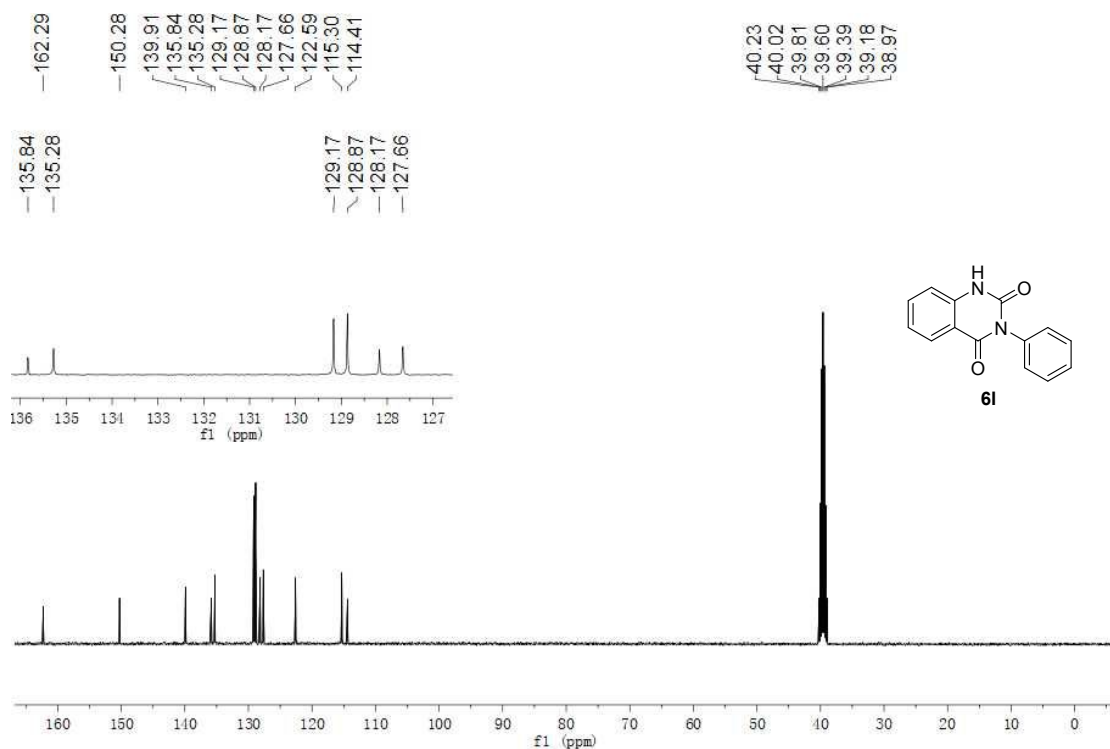

Figure S64. <sup>13</sup>C NMR spectra of 3-phenylquinazoline-2,4(1H,3H)-dione (6l)

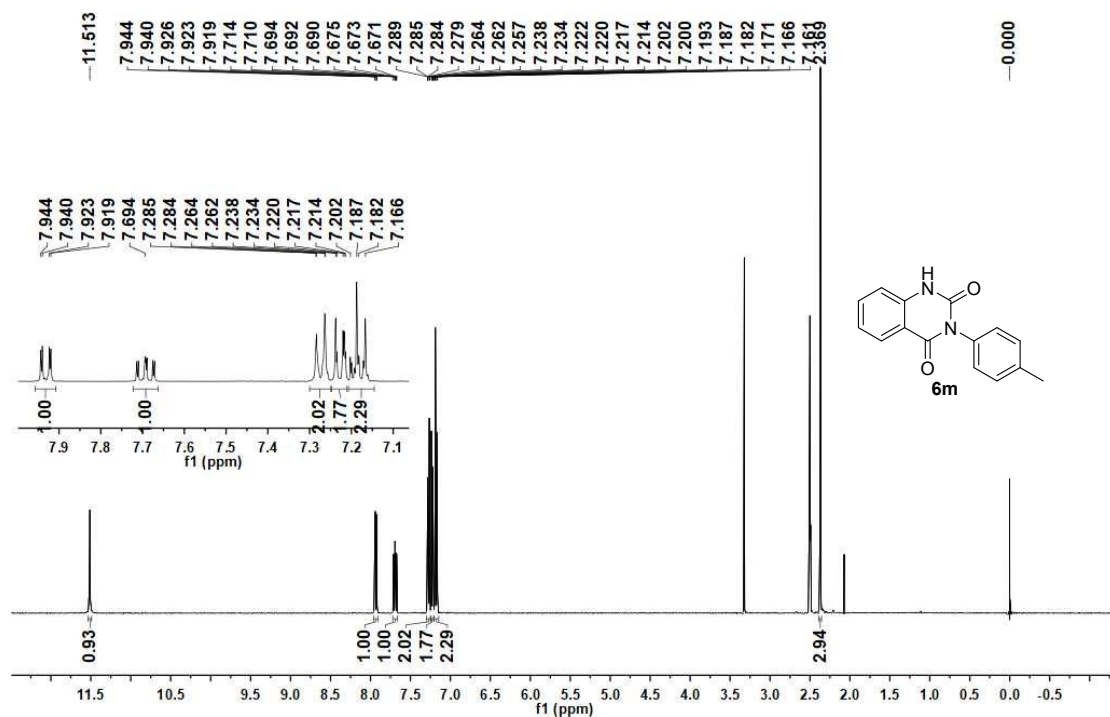

Figure S65. <sup>1</sup>H NMR spectra of 3-(4-methylphenyl)quinazoline-2,4(1H,3H)-dione (6m)

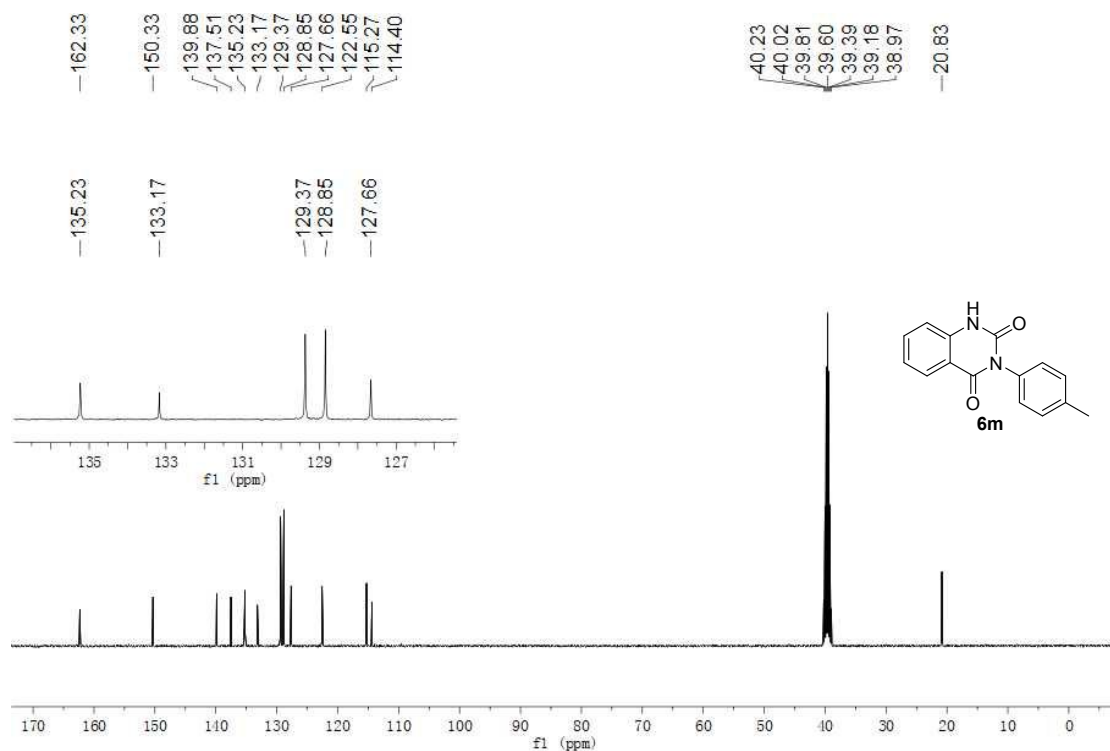

Figure S66. <sup>13</sup>C NMR spectra of 3-(4-methylphenyl)quinazoline-2,4(1H,3H)-dione (6m)

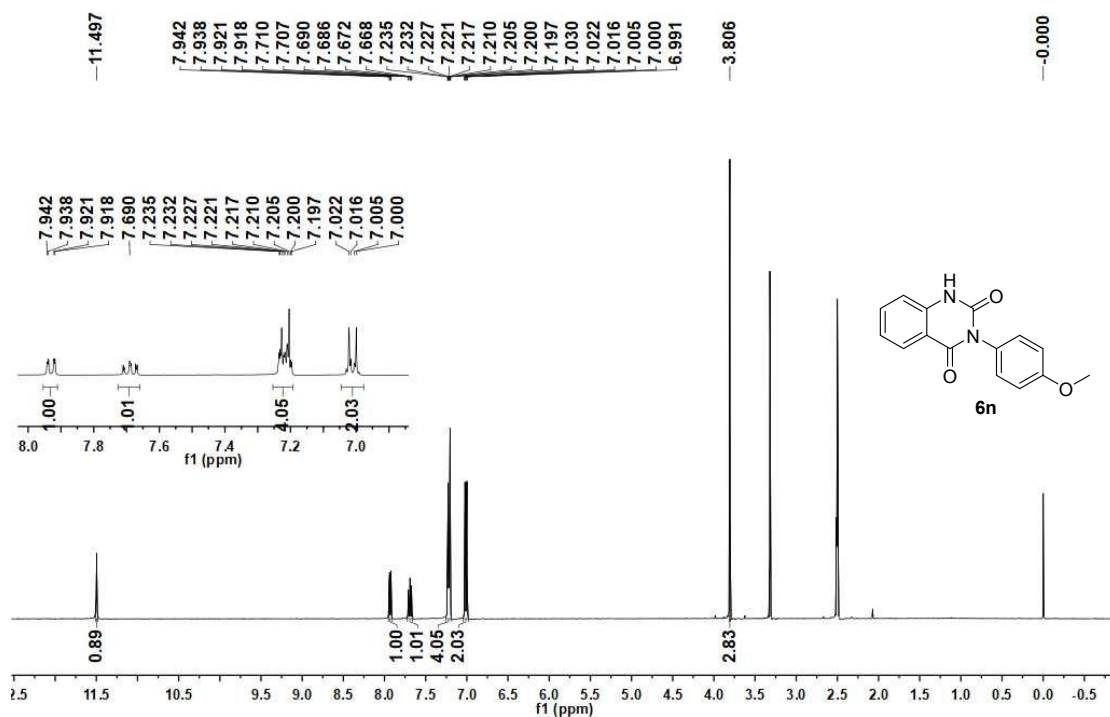

Figure S67. <sup>1</sup>H NMR spectra of 3-(4-methoxyphenyl)quinazoline-2,4(1H,3H)-dione (6n)

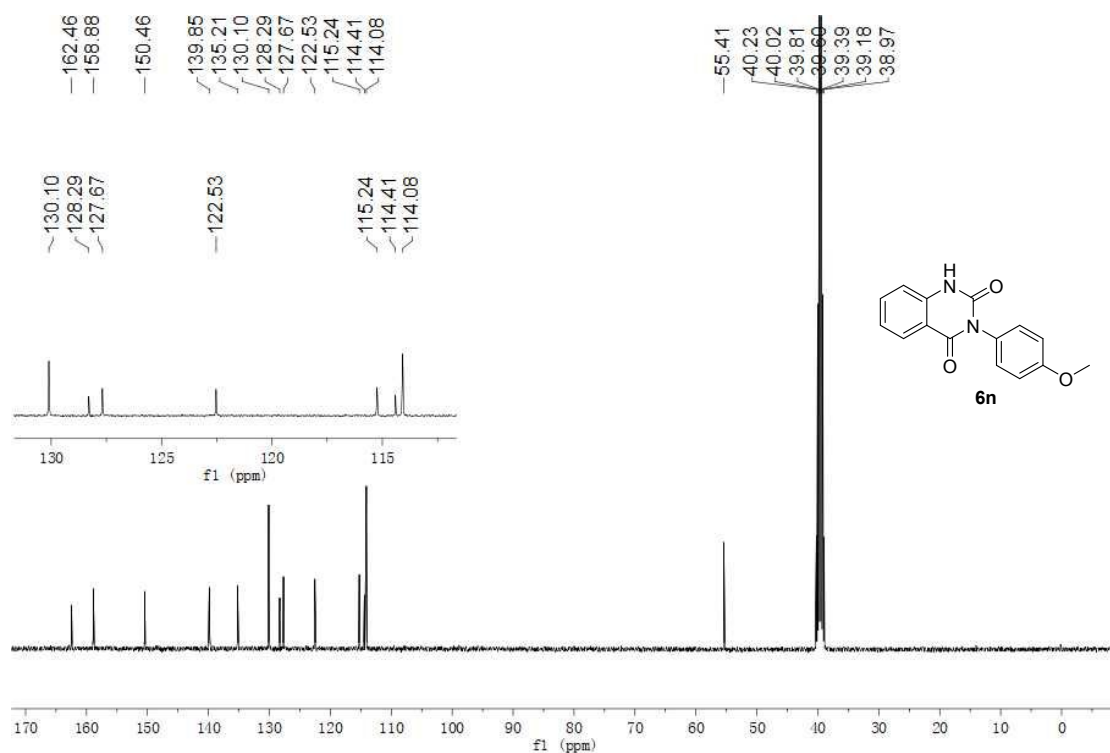

Figure S68. <sup>13</sup>C NMR spectra of 3-(4-methoxyphenyl)quinazoline-2,4(1H,3H)-dione (6n)

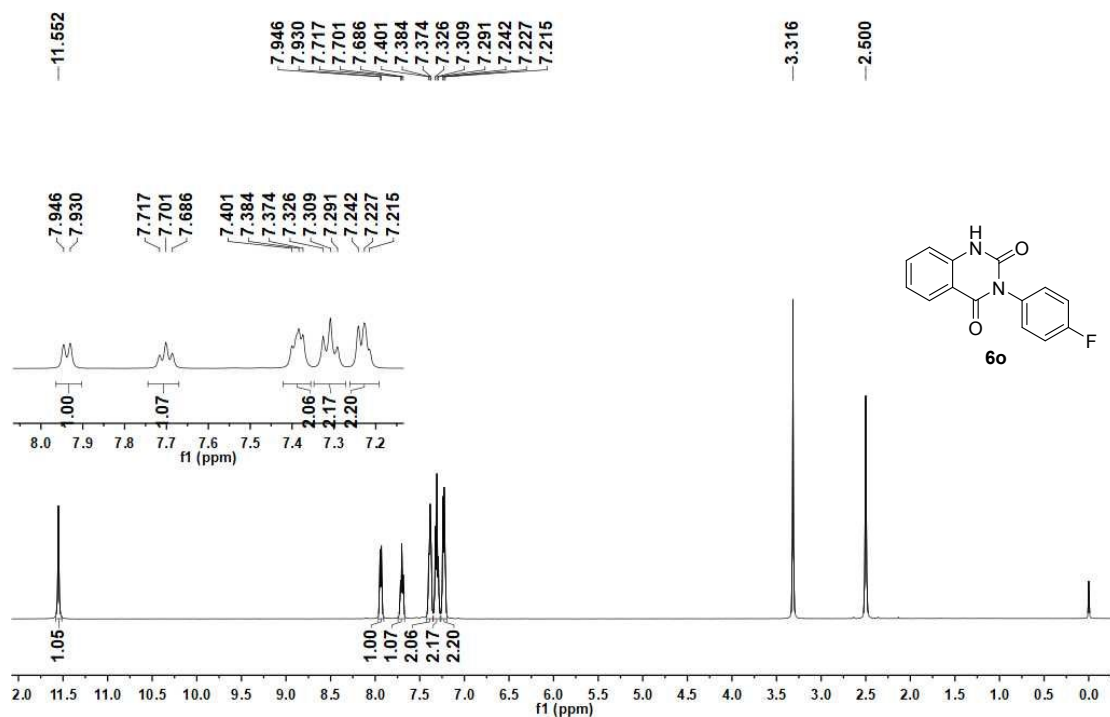

Figure S69. <sup>1</sup>H NMR spectra of 3-(4-fluorophenyl)quinazoline-2,4(1H,3H)-dione (6o)

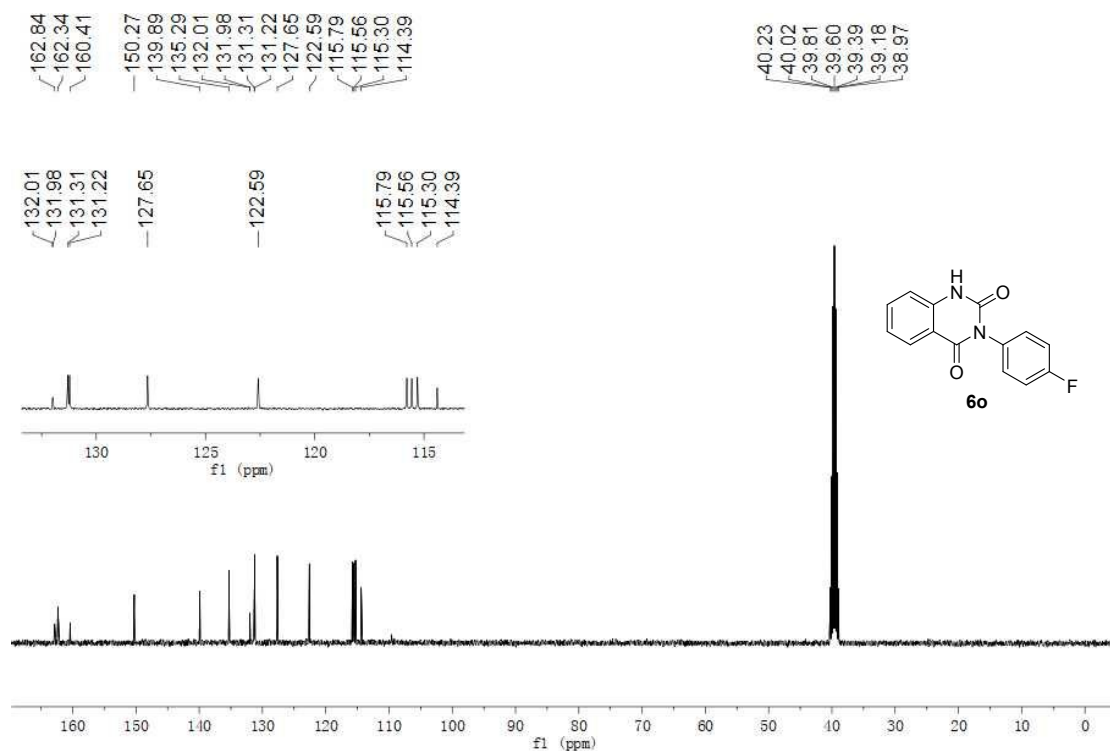

Figure S70. <sup>13</sup>C NMR spectra of 3-(4-fluorophenyl)quinazoline-2,4(1H,3H)-dione (6o)

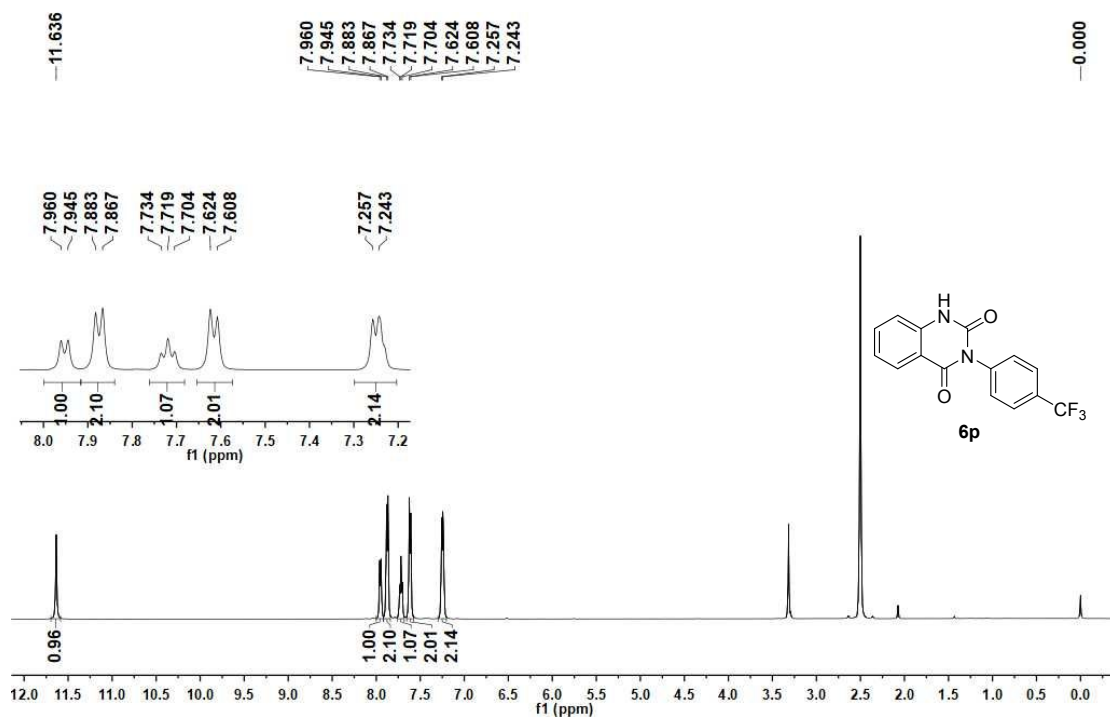

**Figure S71. <sup>1</sup>H NMR spectra of 3-(4-(trifluoromethyl)phenyl)quinazoline-2,4(1H,3H)-dione (6p)**

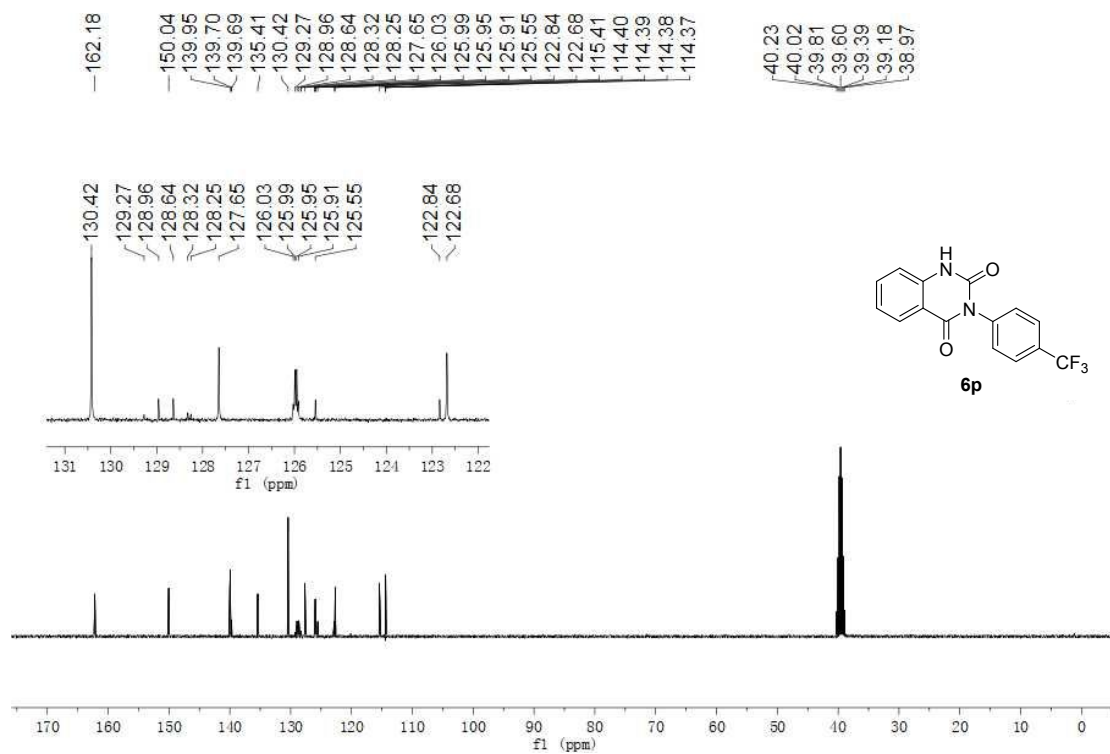

**Figure S72. <sup>13</sup>C NMR spectra of 3-(4-(trifluoromethyl)phenyl)quinazoline-2,4(1H,3H)-dione (6p)**

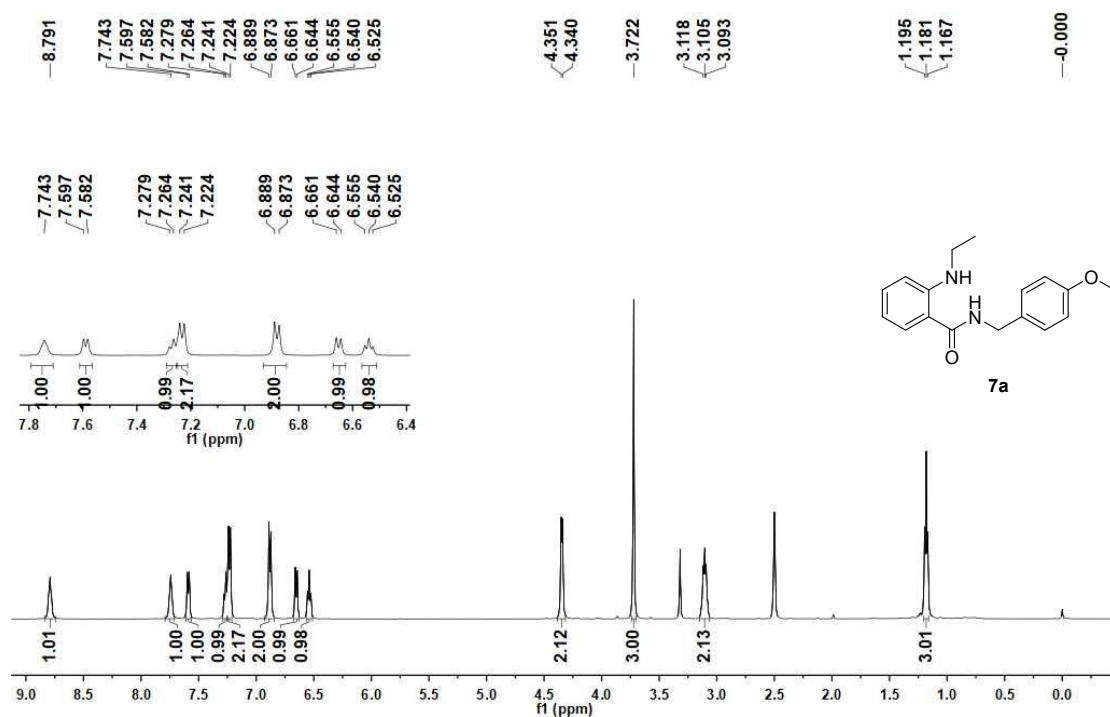

**Figure S73. <sup>1</sup>H NMR spectra of 2-(ethylamino)-N-(4-methoxybenzyl)benzamide (7a)**

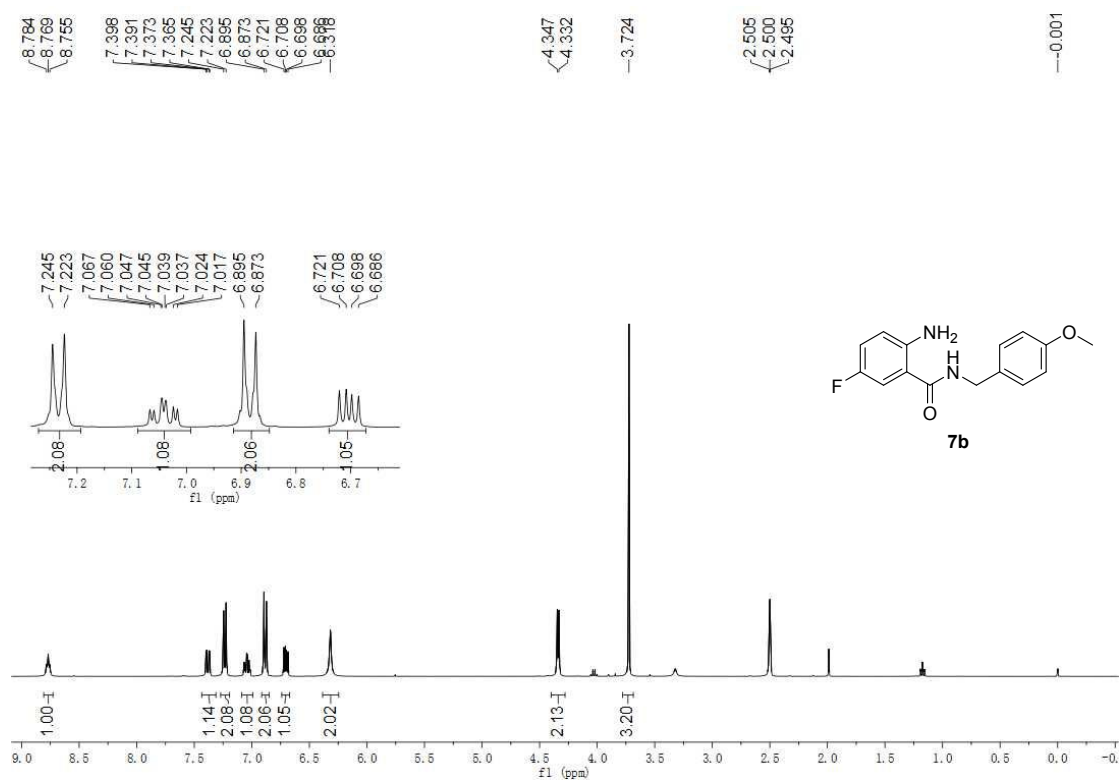

**Figure S74. <sup>1</sup>H NMR spectra of 2-amino-5-fluoro-N-(4-methoxybenzyl)benzamide (7b)**



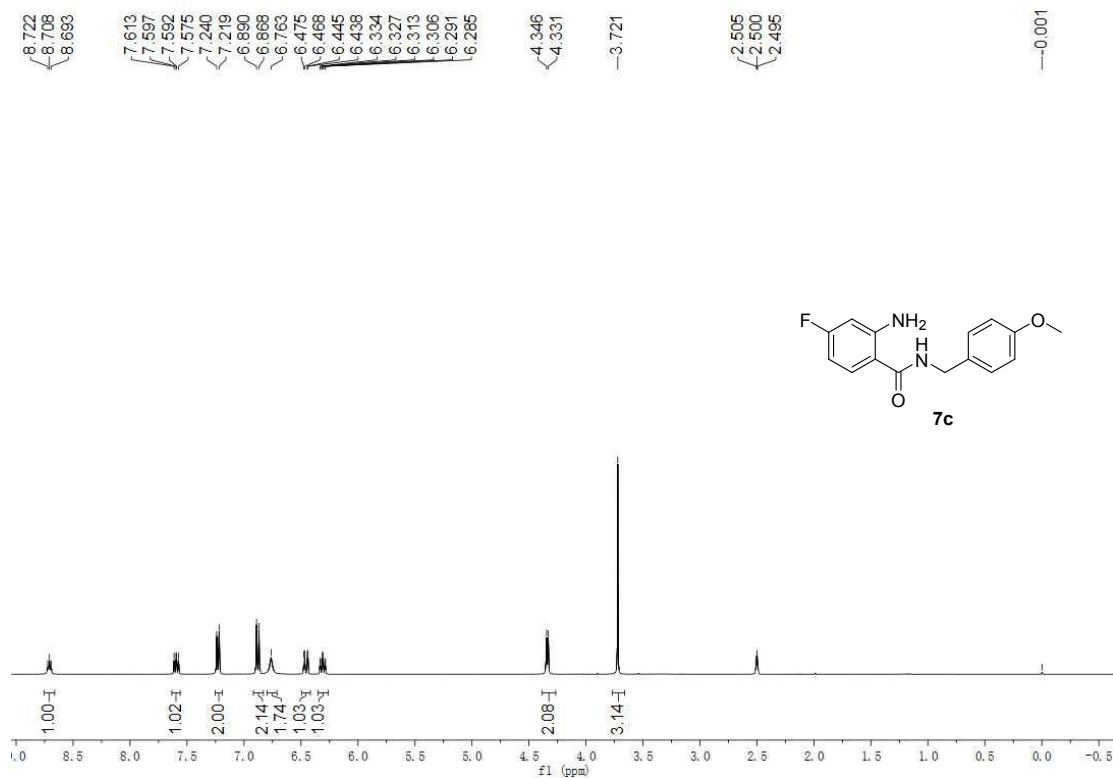

Figure S75. <sup>1</sup>H NMR spectra of 2-amino-4-fluoro-N-(4-methoxybenzyl)benzamide (7c)

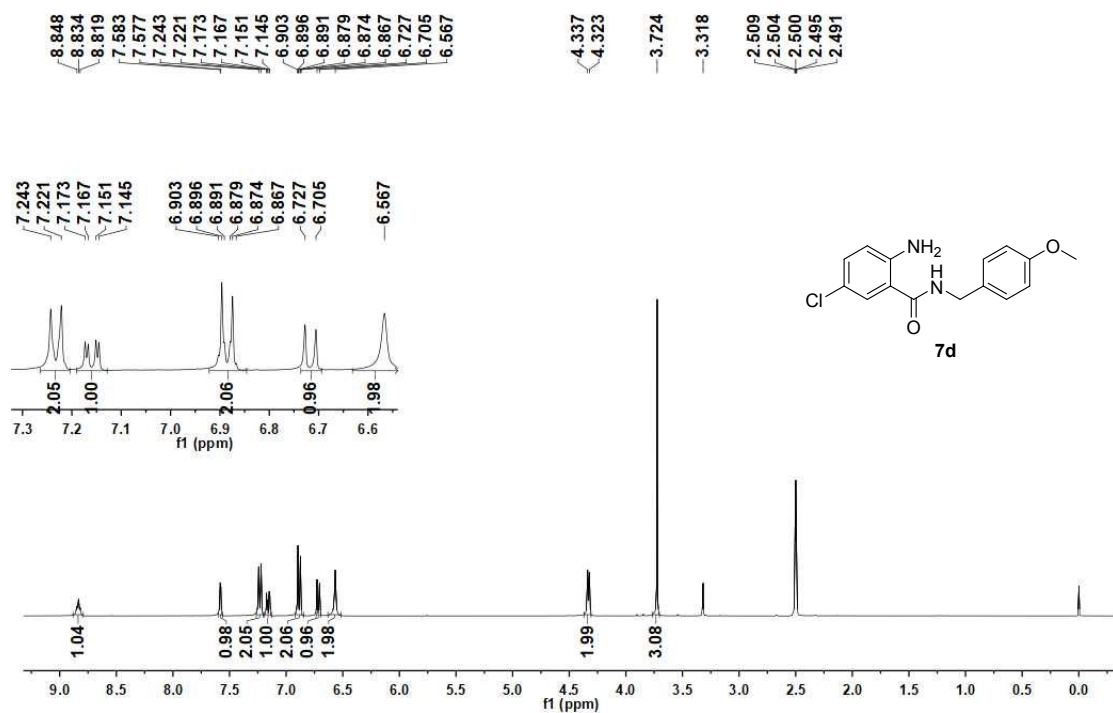

Figure S76. <sup>1</sup>H NMR spectra of 2-amino-5-chloro-N-(4-methoxybenzyl)benzamide (7d)



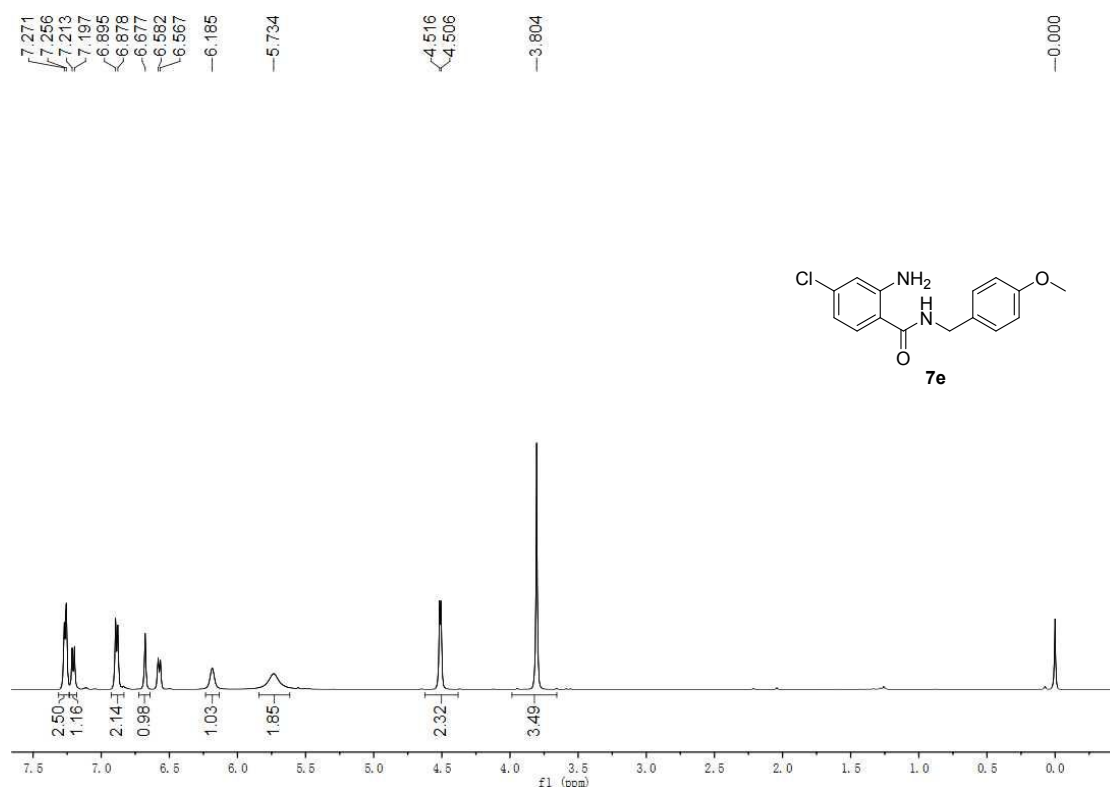

Figure S77. <sup>1</sup>H NMR spectra of 2-amino-4-chloro-N-(4-methoxybenzyl)benzamide (7e)

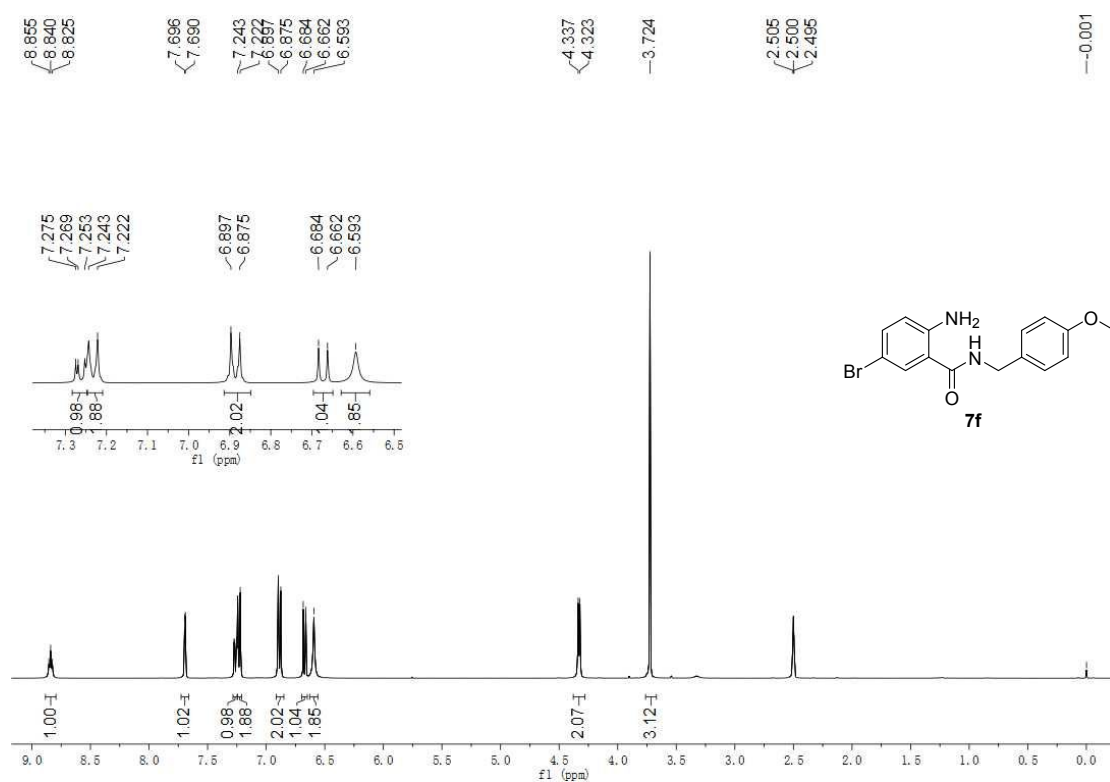

Figure S78. <sup>1</sup>H NMR spectra of 2-amino-5-bromo-N-(4-methoxybenzyl)benzamide (7f)

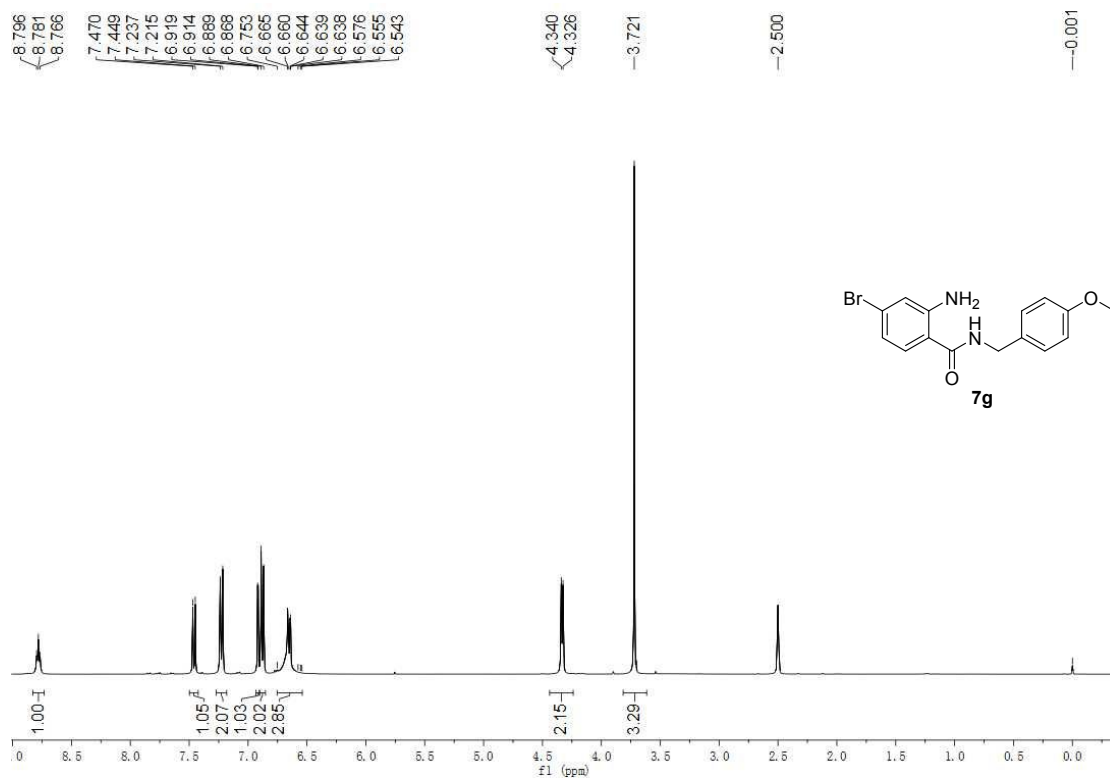

Figure S79. <sup>1</sup>H NMR spectra of 2-amino-4-bromo-*N*-(4-methoxybenzyl)benzamide (7g)

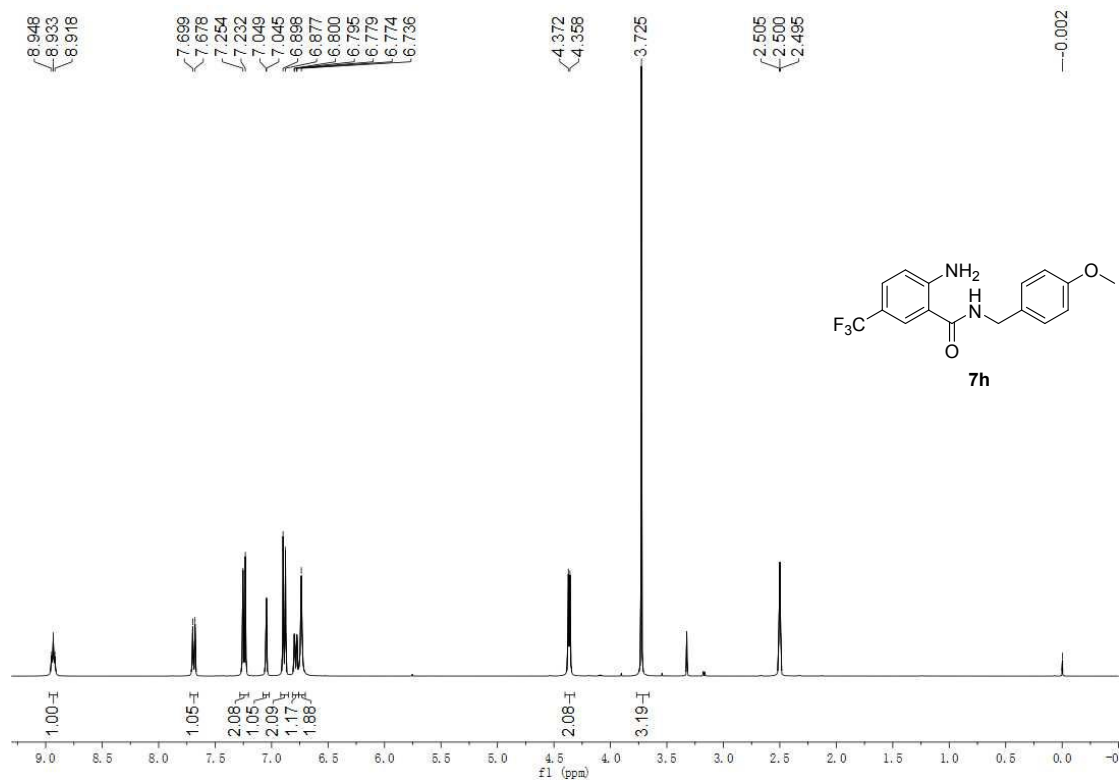

Figure S80. <sup>1</sup>H NMR spectra of 2-amino-*N*-(4-methoxybenzyl)-5-(trifluoromethyl)benzamide (7h)

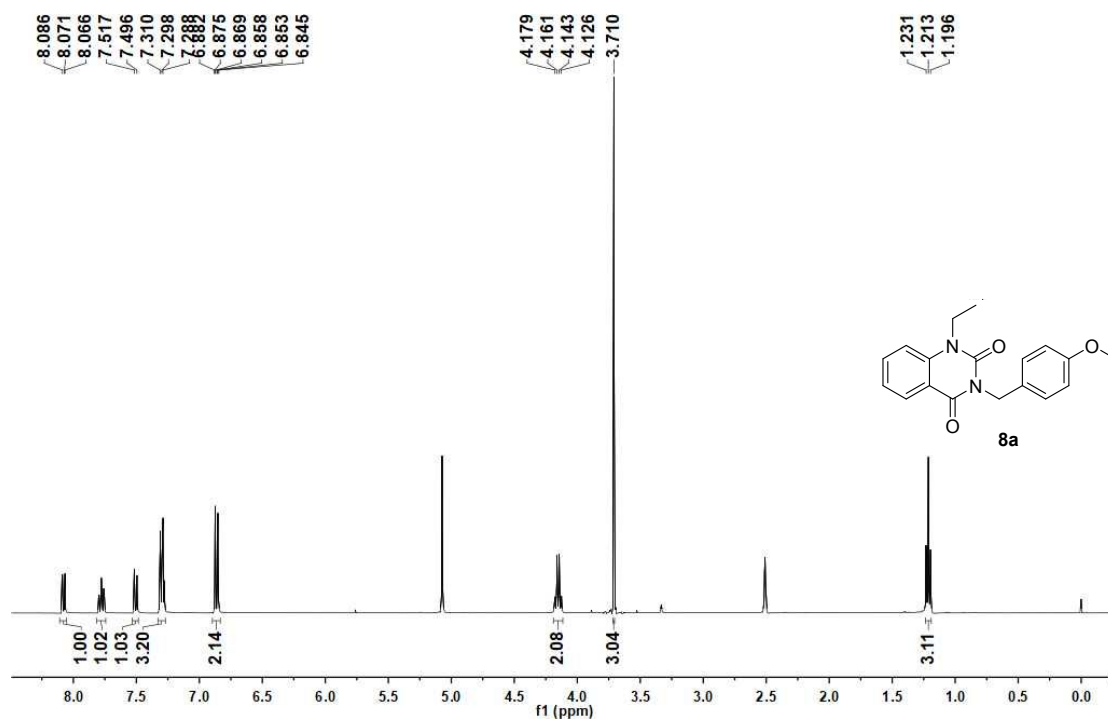

Figure S81.  $^1\text{H}$  NMR spectra of 1-ethyl-3-(4-methoxybenzyl)quinazoline-2,4(1H,3H)-dione (8a)

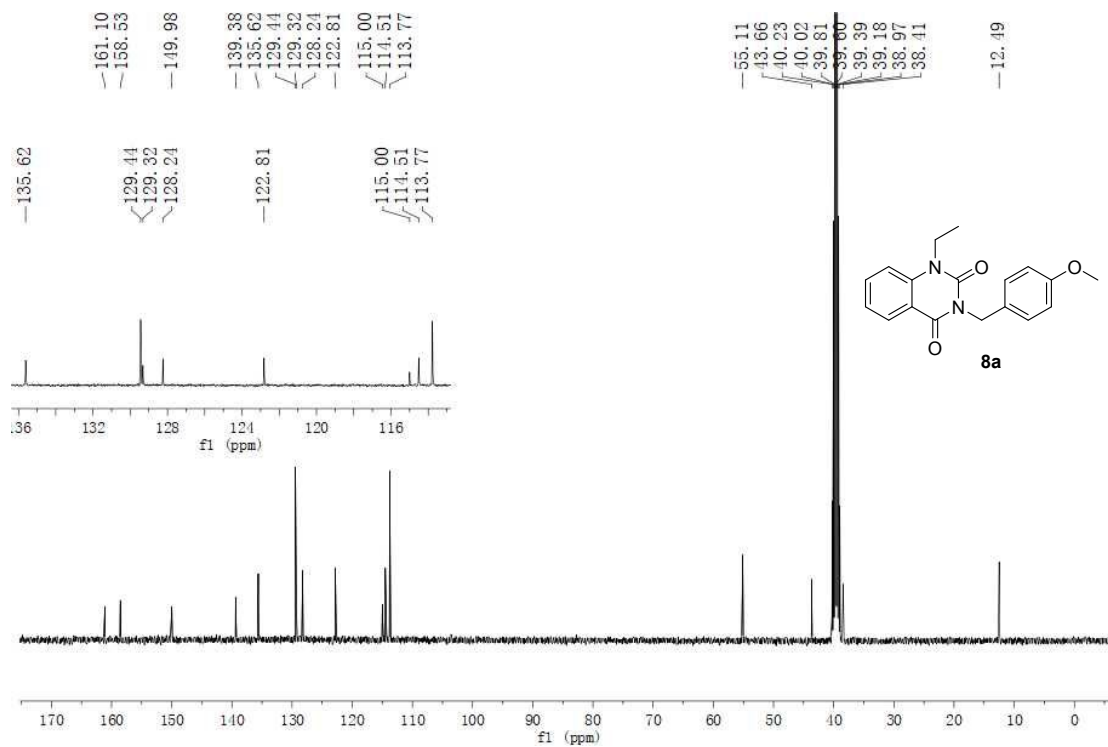

Figure S82.  $^{13}\text{C}$  NMR spectra of 1-ethyl-3-(4-methoxybenzyl)quinazoline-2,4(1H,3H)-dione (8a)

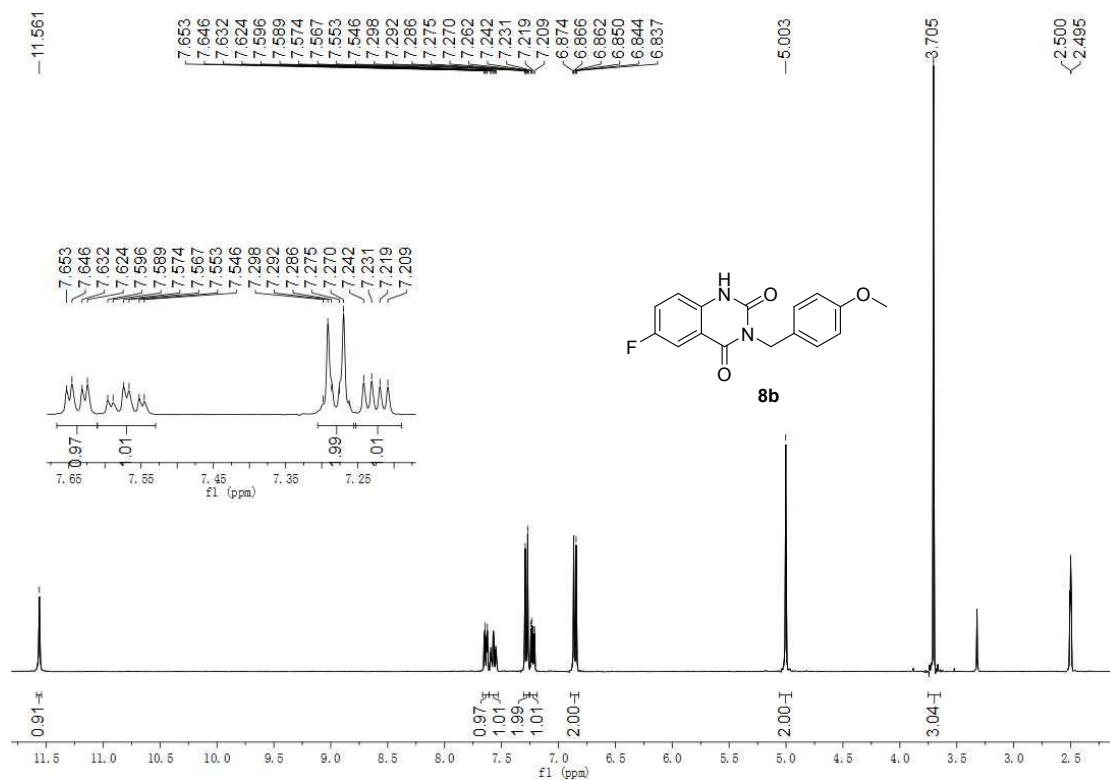

**Figure S83. <sup>1</sup>H NMR spectra of 6-fluoro-3-(4-methoxybenzyl)quinazoline-2,4(1*H*,3*H*)-dione (8b)**

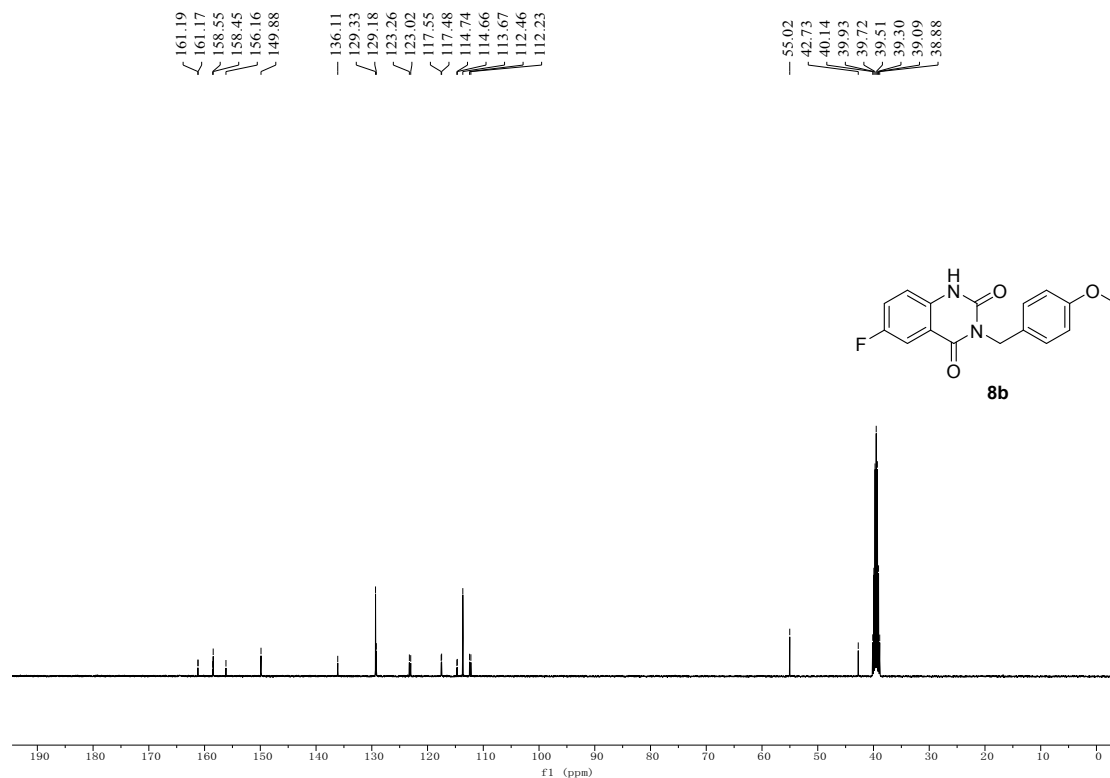

**Figure S84. <sup>13</sup>C NMR spectra of 6-fluoro-3-(4-methoxybenzyl)quinazoline-2,4(1*H*,3*H*)-dione (8b)**

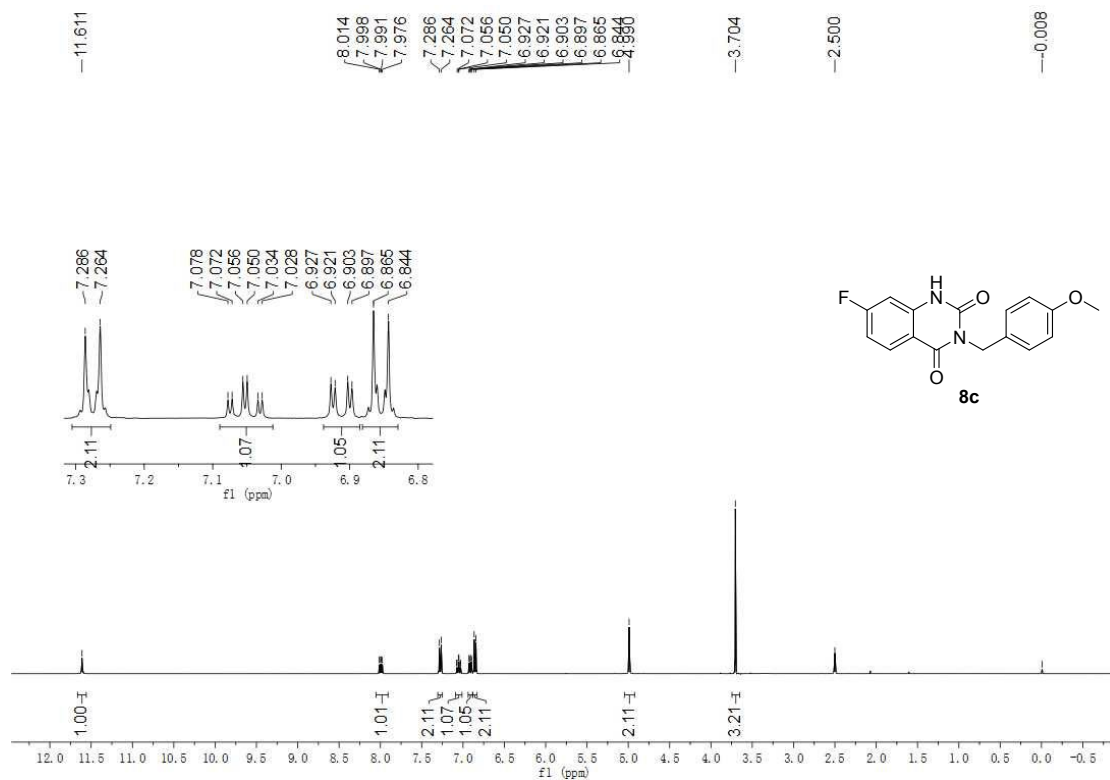

**Figure S85. <sup>1</sup>H NMR spectra of 7-fluoro-3-(4-methoxybenzyl)quinazoline-2,4(1H,3H)-dione (8c)**

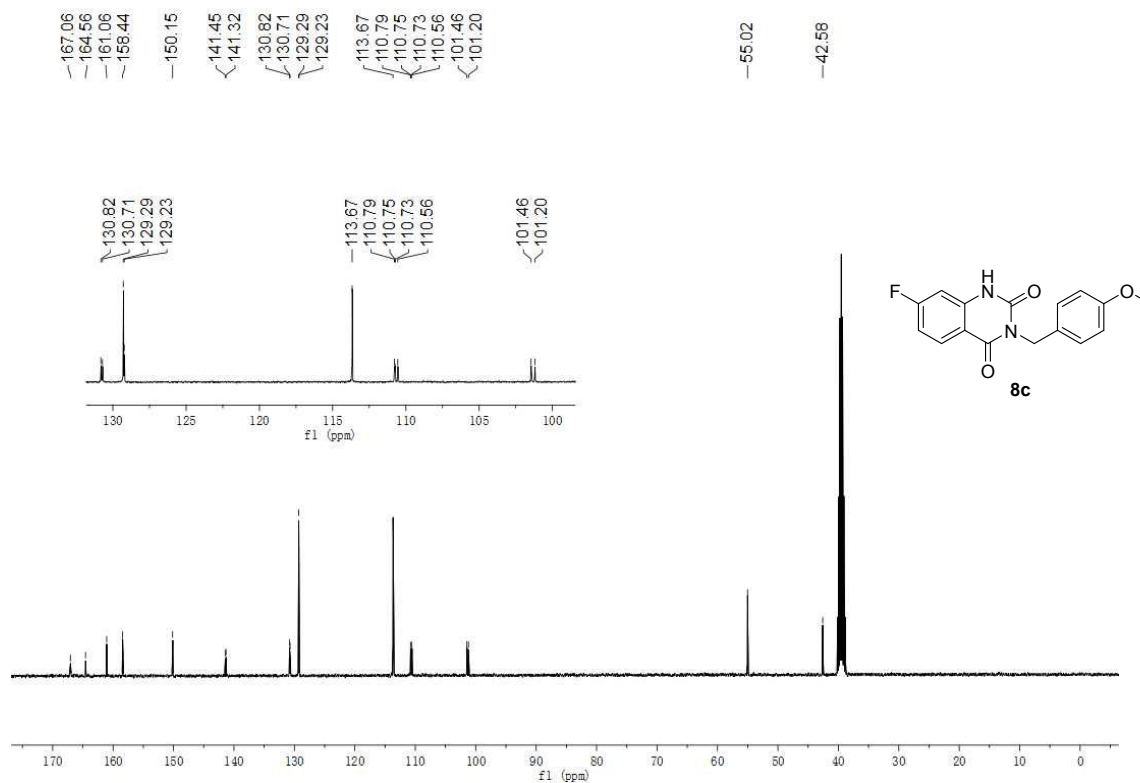

**Figure S86. <sup>13</sup>C NMR spectra of 7-fluoro-3-(4-methoxybenzyl)quinazoline-2,4(1H,3H)-dione (8c)**

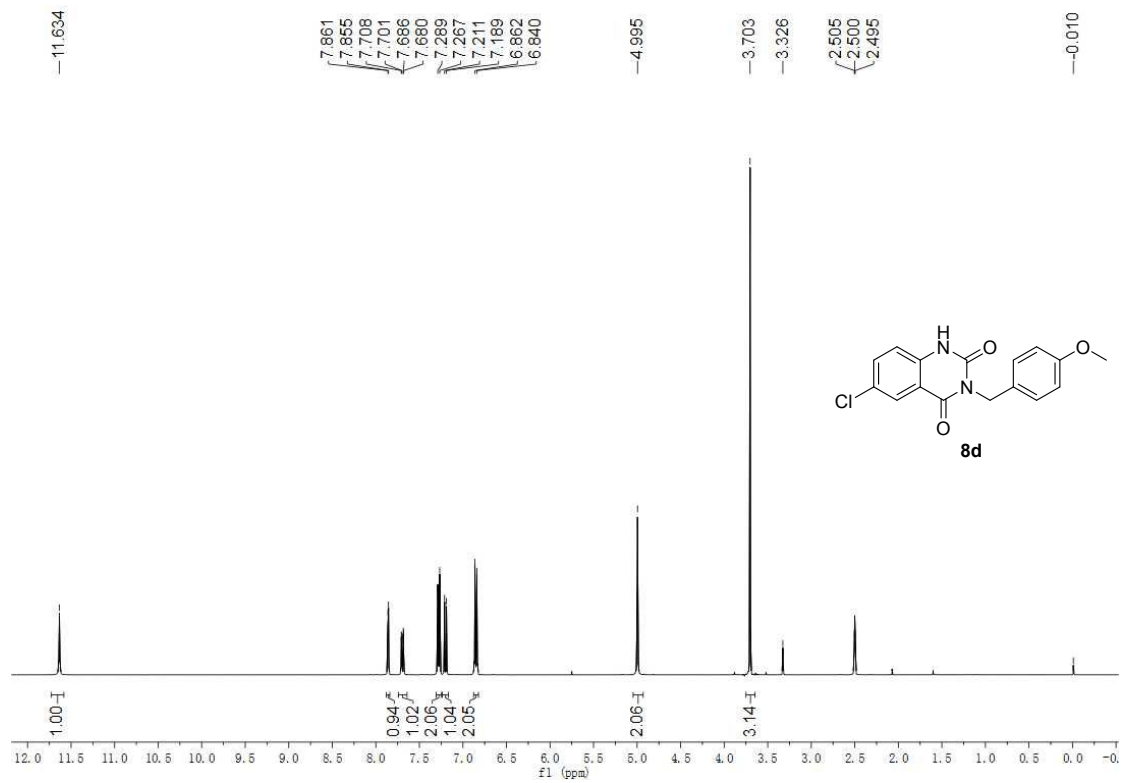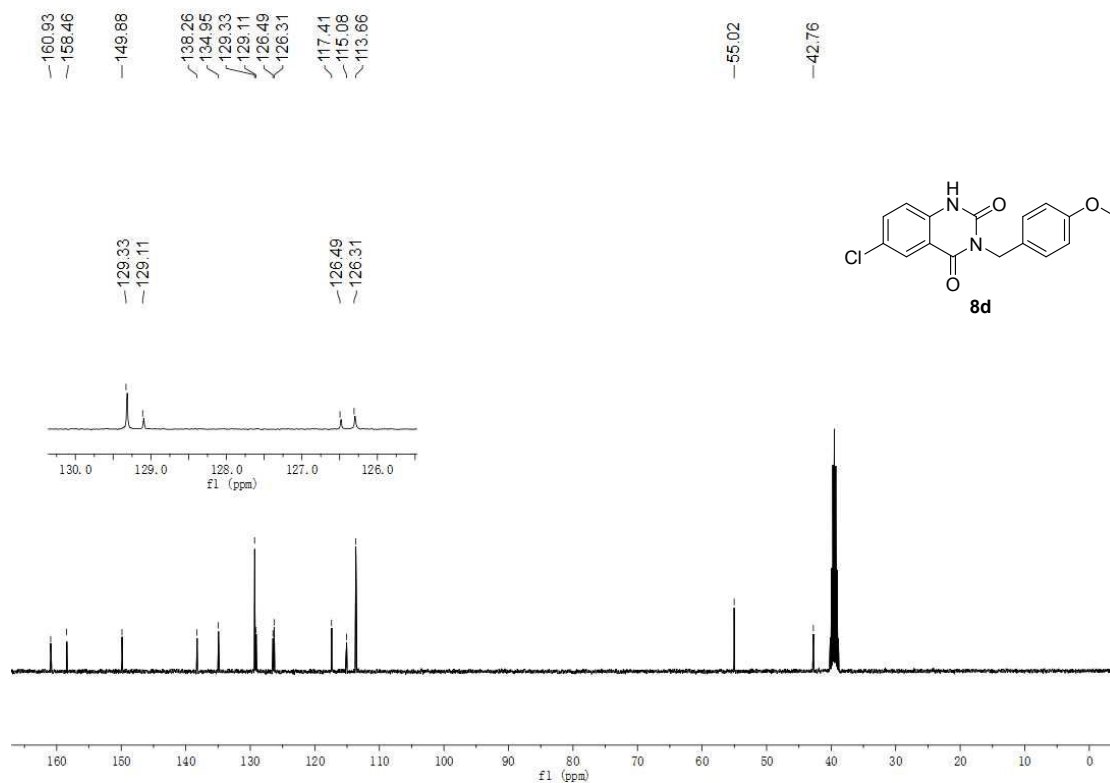

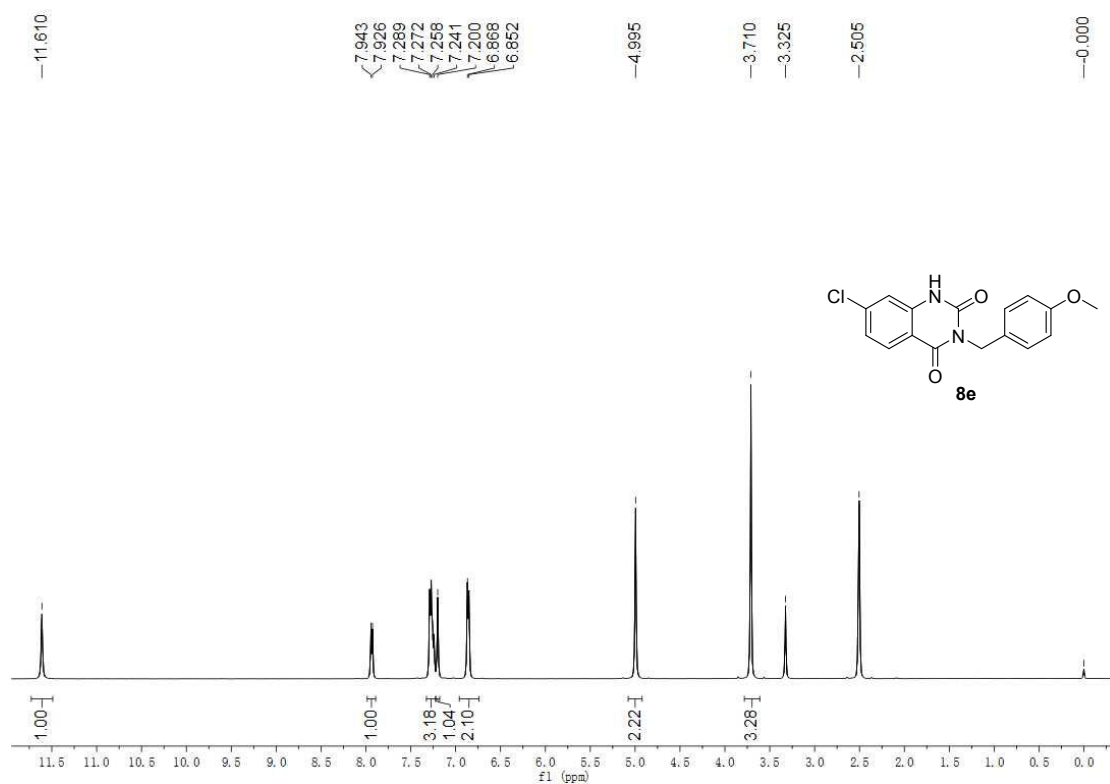

Figure S89. <sup>1</sup>H NMR spectra of 7-chloro-3-(4-methoxybenzyl)quinazoline-2,4(1H,3H)-dione (8e)

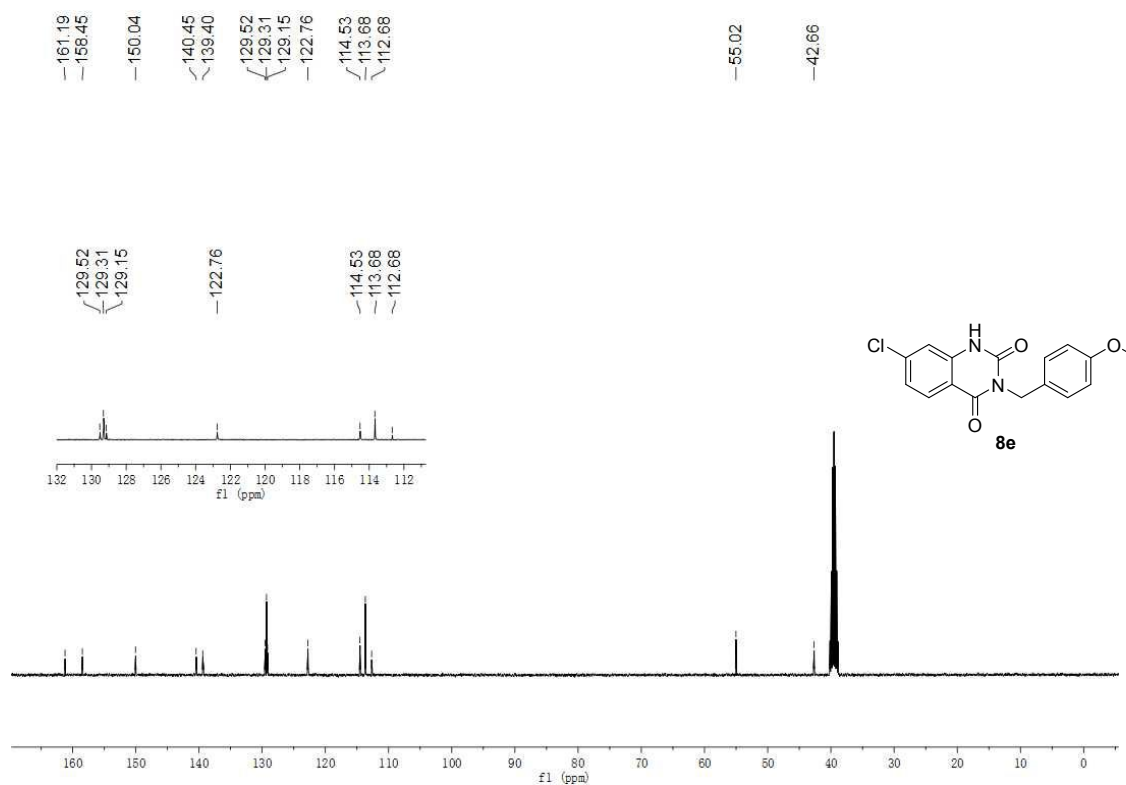

Figure S90. <sup>13</sup>C NMR spectra of 7-chloro-3-(4-methoxybenzyl)quinazoline-2,4(1H,3H)-dione (8e)

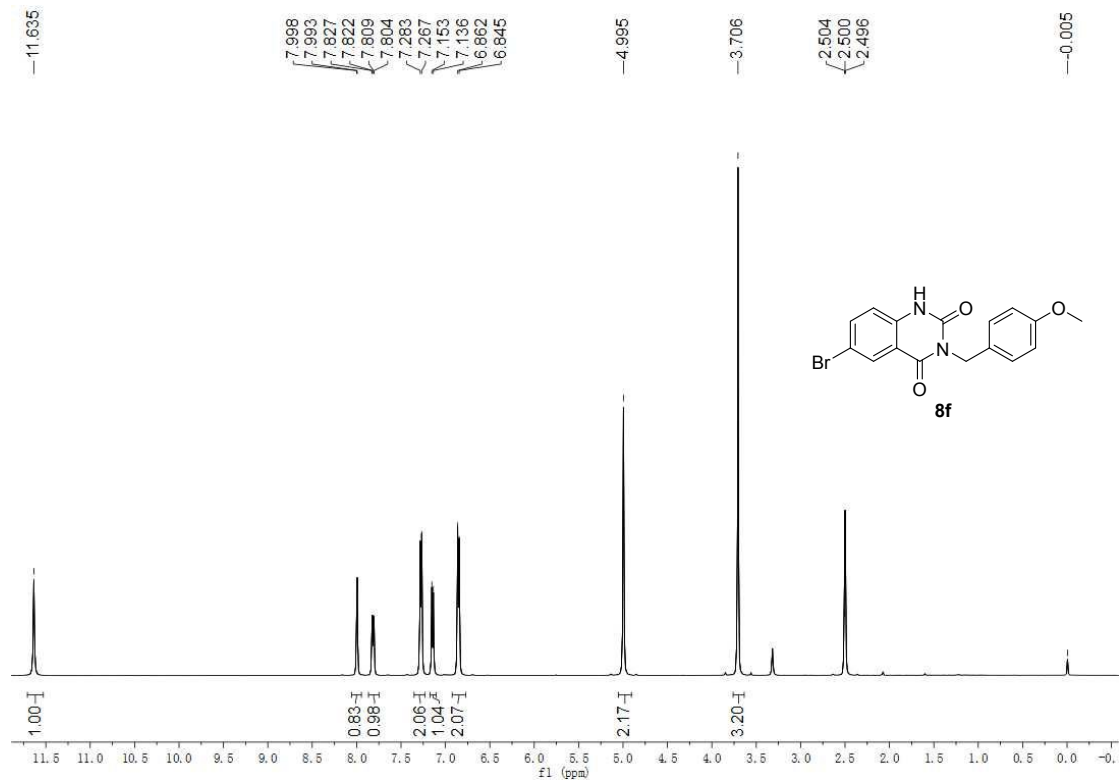

Figure S91. <sup>1</sup>H NMR spectra of 6-bromo-3-(4-methoxybenzyl)quinazoline-2,4(1H,3H)-dione (8f)

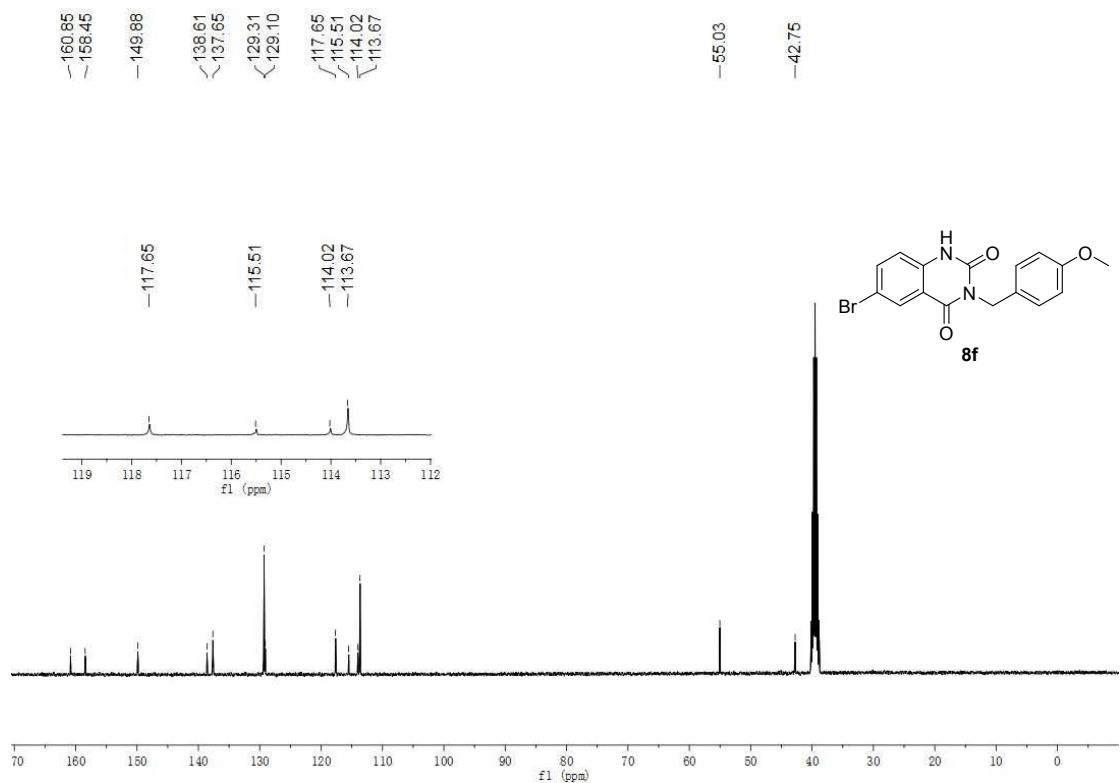

Figure S92. <sup>13</sup>C NMR spectra of 6-bromo-3-(4-methoxybenzyl)quinazoline-2,4(1H,3H)-dione (8f)



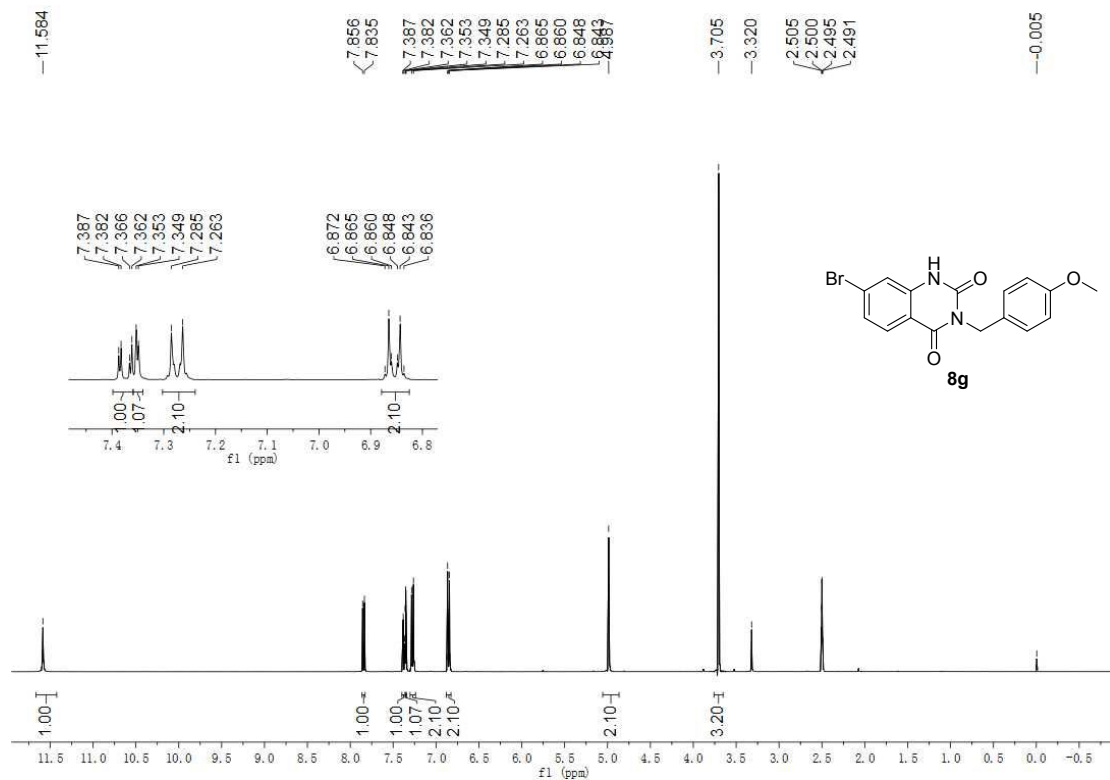

Figure S93. <sup>1</sup>H NMR spectra of 7-bromo-3-(4-methoxybenzyl)quinazoline-2,4(1H,3H)-dione (8g)

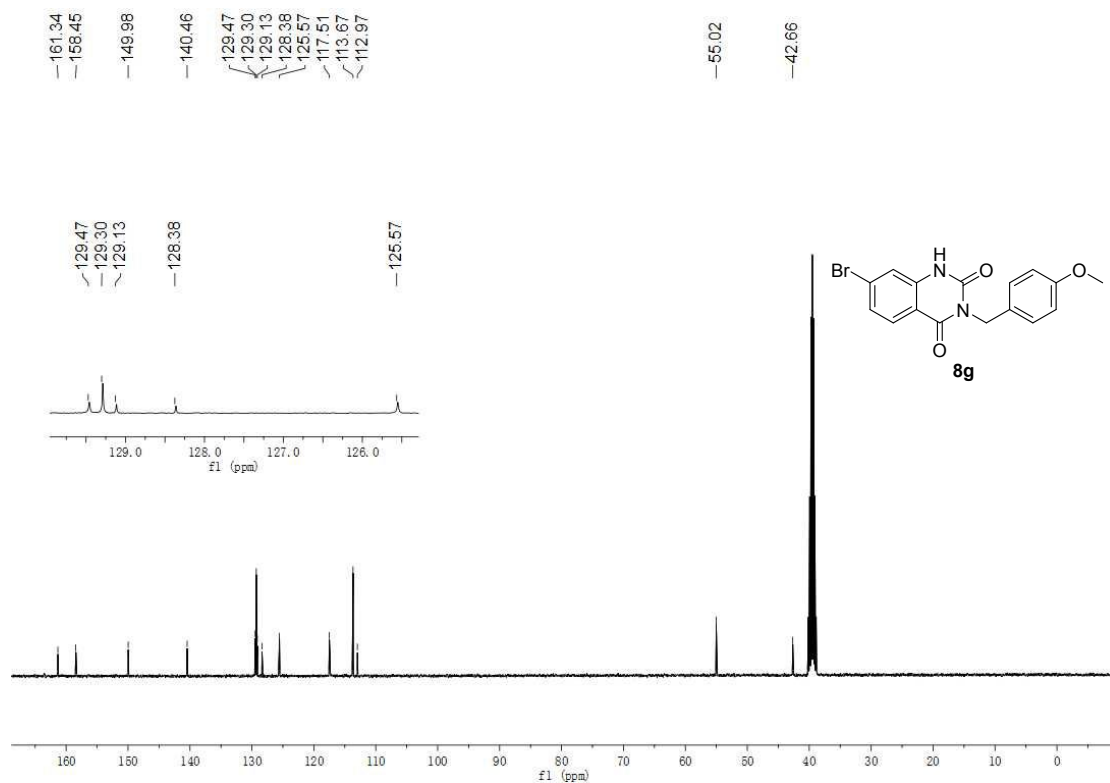

Figure S94. <sup>13</sup>C NMR spectra of 7-bromo-3-(4-methoxybenzyl)quinazoline-2,4(1H,3H)-dione (8g)

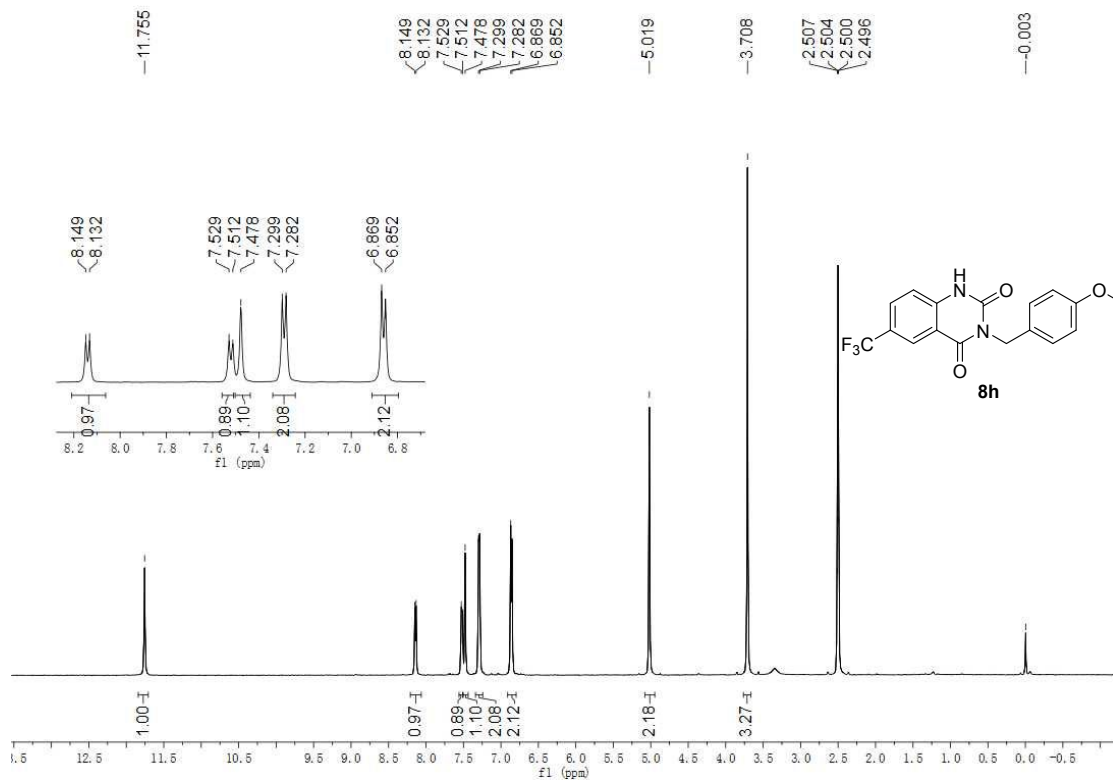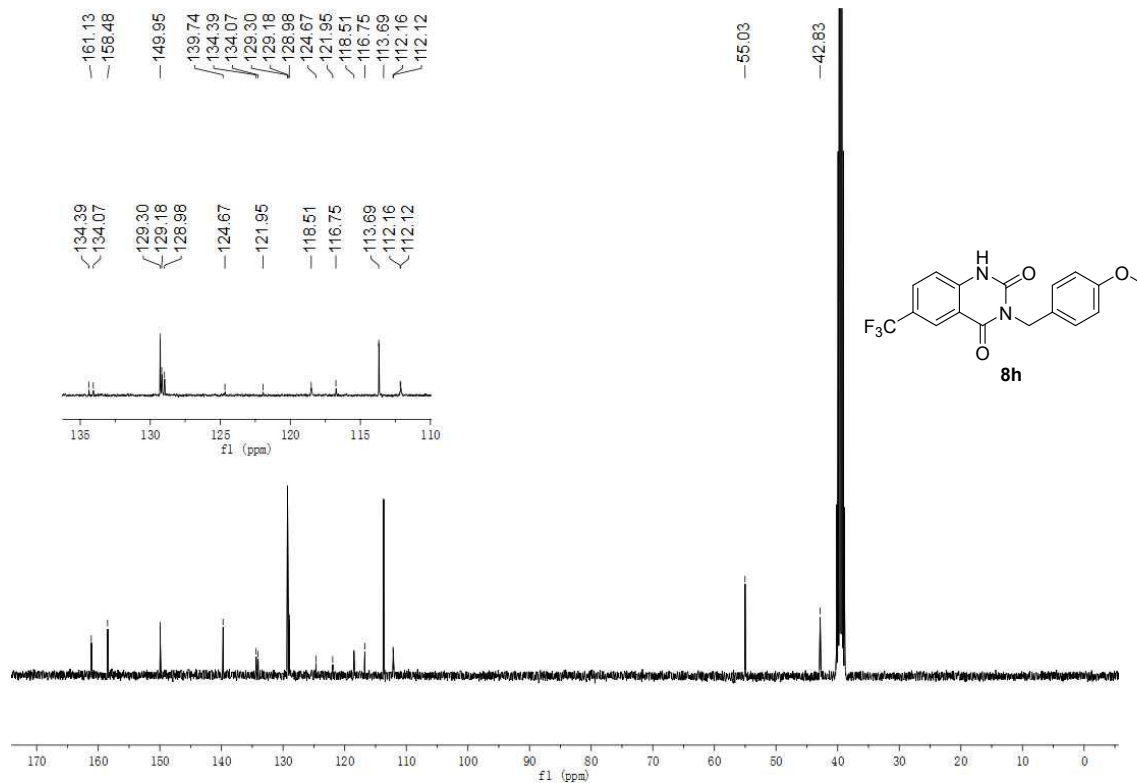

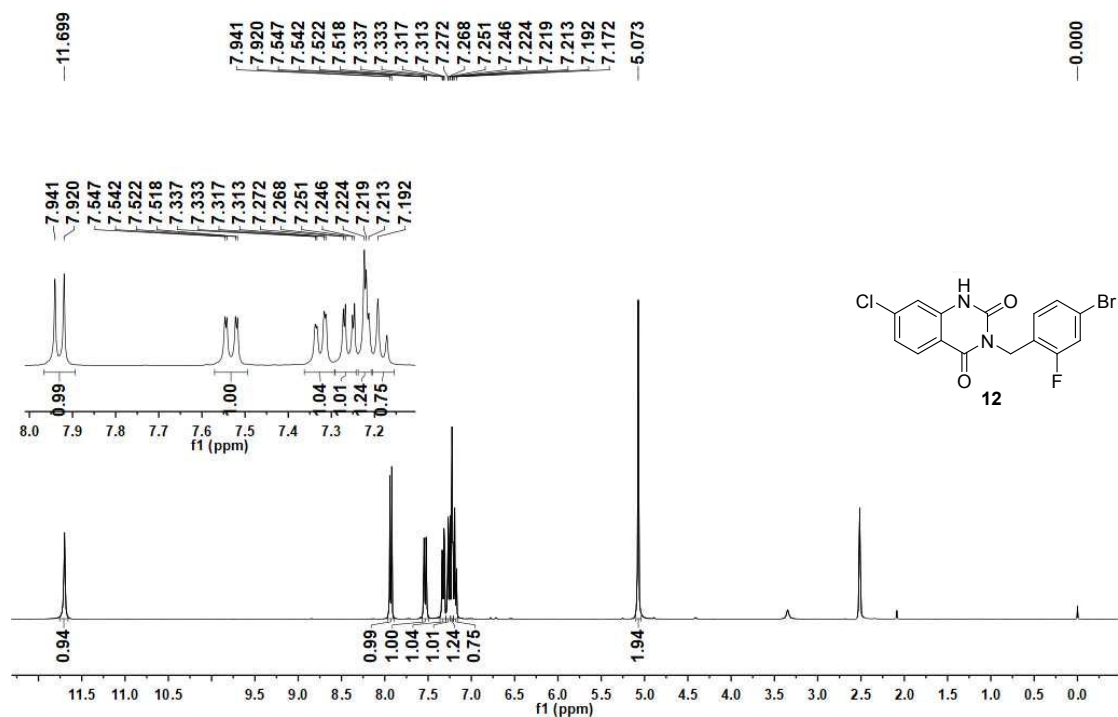

Figure S97. <sup>1</sup>H NMR spectra of 3-(4-bromo-2-fluorobenzyl)-7-chloroquinazoline-2,4(1H,3H)-dione (12)

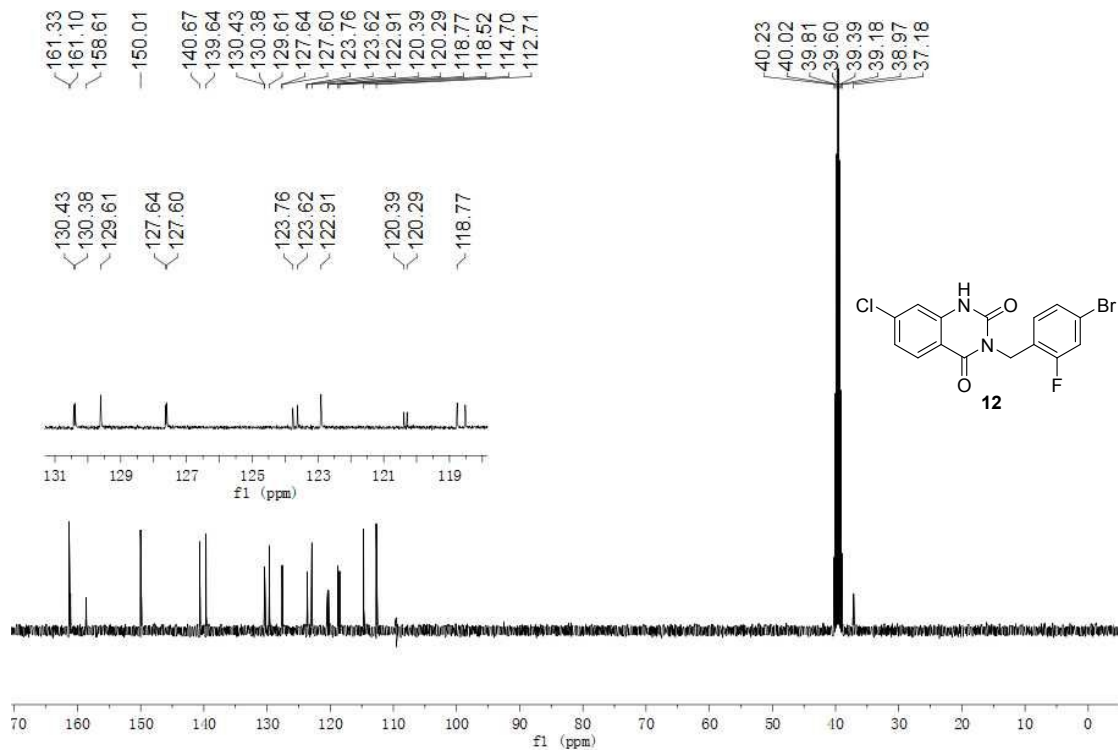

Figure S98. <sup>13</sup>C NMR spectra of 3-(4-bromo-2-fluorobenzyl)-7-chloroquinazoline-2,4(1H,3H)-dione (12)

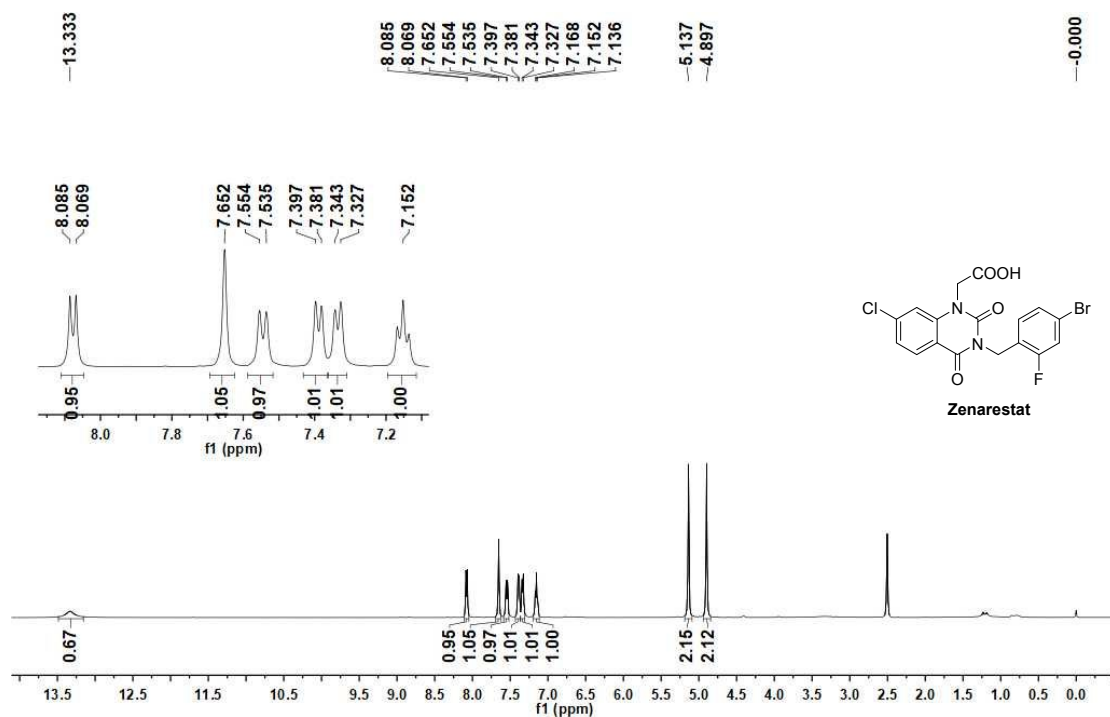

Figure S99. <sup>1</sup>H NMR spectra of Zenarestat

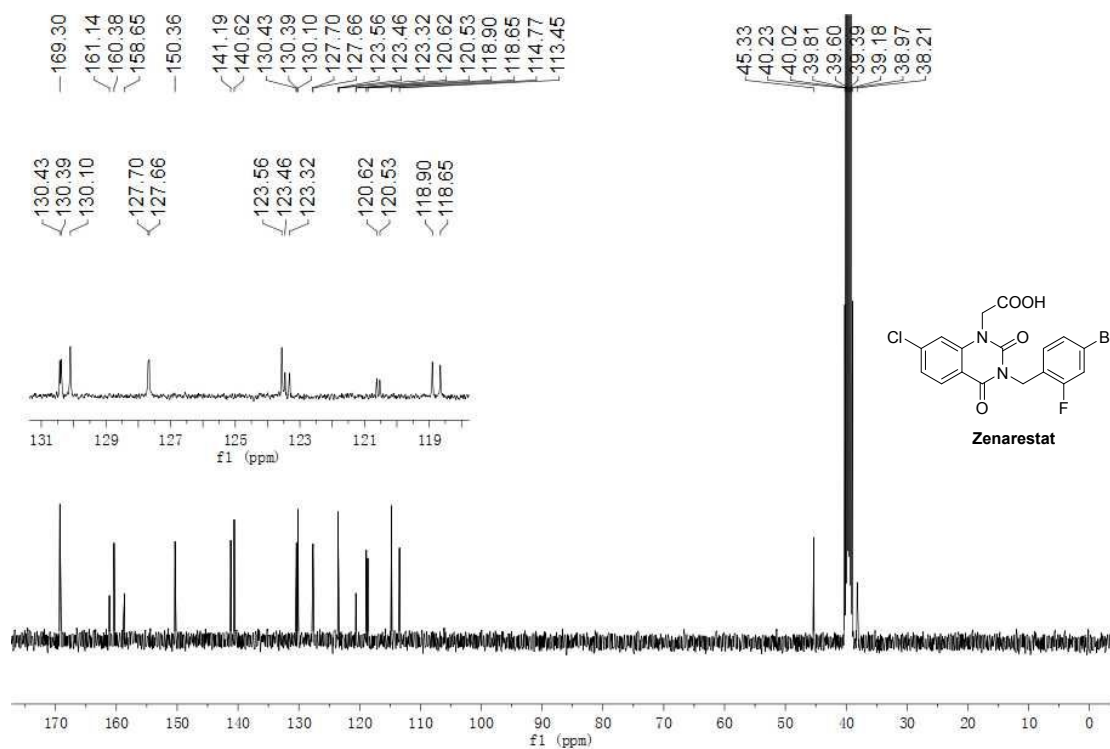

Figure S100. <sup>13</sup>C NMR spectra of Zenarestat
